# Supplementary material for: Intermolecular diastereoselective annulation of azaarenes into fused N-heterocycles by Ru(II) reductive catalysis
Source: PubMed Central journal article supplement (PMC9061824; doi:10.1038/s41467-022-29985-z), 2022-05-02
Supplement: 41467_2022_29985_MOESM3_ESM.pdf [file 41467_2022_29985_MOESM3_ESM.pdf]

# Supplementary Information

## Supplementary Data

Cartesian coordinates and absolute energies for all species

int-2

G +ZPE = -673.153856 a.u

|   |             |             |             |
|---|-------------|-------------|-------------|
| N | -1.27767300 | -0.38010100 | -1.36049500 |
| C | -0.04047000 | 0.14856100  | -1.73654600 |
| C | -2.49417800 | 0.21459100  | -1.89810300 |
| C | 1.13805100  | -0.33430000 | -1.33354000 |
| H | -0.10564500 | 1.00088900  | -2.40115100 |
| C | -1.31468800 | -1.57314100 | -0.62241400 |
| C | -3.35308200 | 0.96810200  | -0.89024500 |
| H | -2.18702400 | 0.90770600  | -2.68498200 |
| H | -3.10026900 | -0.55088200 | -2.39409700 |
| C | 1.23947300  | -1.49716300 | -0.38672800 |
| H | 2.04531200  | 0.13997600  | -1.68687700 |
| C | -0.11122400 | -2.16020100 | -0.16452100 |
| C | -2.53504100 | -2.21138100 | -0.33779200 |
| C | -4.72474800 | 1.10987300  | -1.12370800 |
| C | -2.79681200 | 1.56872900  | 0.24176400  |
| H | 1.95499200  | -2.23944300 | -0.76319100 |
| H | 1.65283700  | -1.16966400 | 0.57964300  |
| C | -0.17612100 | -3.36938100 | 0.52650000  |
| C | -2.56753600 | -3.41275700 | 0.36385600  |
| H | -3.46813300 | -1.76748800 | -0.65510000 |
| C | -5.52408200 | 1.84339500  | -0.24883700 |
| H | -5.17151700 | 0.64104800  | -1.99516900 |
| C | -3.59511200 | 2.29975000  | 1.12071800  |
| H | -1.73665800 | 1.45908000  | 0.43898500  |
| C | -1.38597900 | -4.00606900 | 0.79779400  |
| H | 0.75264000  | -3.81808300 | 0.86625100  |
| H | -3.52438300 | -3.88002800 | 0.56849200  |
| C | -4.96066000 | 2.44143200  | 0.87790800  |
| H | -6.58626100 | 1.94196500  | -0.44348900 |
| H | -3.14932400 | 2.75813100  | 1.99659500  |
| H | -1.40312600 | -4.94291100 | 1.34220500  |
| H | -5.58111400 | 3.00843800  | 1.56261300  |

B1'

G +ZPE = -404.505178 a.u

|   |             |             |             |
|---|-------------|-------------|-------------|
| C | 3.02902400  | -1.37459600 | 0.90282300  |
| C | 0.72155100  | 2.19306900  | 0.47748400  |
| C | 2.78403400  | 0.96602700  | 0.54804400  |
| N | 3.49308600  | -0.29012900 | 0.40370000  |
| H | 3.54719300  | -2.30792200 | 0.72253900  |
| H | 2.12892300  | -1.35484000 | 1.50242500  |
| C | 1.40629800  | 3.34989500  | 0.84350200  |
| H | -0.34551600 | 2.22263400  | 0.29607800  |
| C | 3.48595900  | 2.11937400  | 0.89810700  |
| C | 4.78265000  | -0.31268600 | -0.37463000 |
| C | 2.78480800  | 3.31079300  | 1.05094800  |
| H | 0.86874100  | 4.28311700  | 0.95878900  |
| H | 4.55265600  | 2.09330900  | 1.07343800  |
| C | 6.00740600  | -0.42437600 | 0.52733100  |
| H | 4.79580700  | 0.59547300  | -0.97133200 |
| H | 4.71223900  | -1.16385800 | -1.05071500 |
| H | 3.31959900  | 4.20804900  | 1.33617900  |
| H | 6.89484800  | -0.45200600 | -0.10753700 |
| H | 6.09935700  | 0.42562300  | 1.20408400  |
| H | 5.98353500  | -1.34169600 | 1.11824800  |
| C | 1.40766400  | 0.99208300  | 0.32459300  |
| H | 0.88519500  | 0.09948800  | 0.00406900  |

**int-3a**

**G +ZPE = -1077.649035 a.u**

|   |             |             |             |
|---|-------------|-------------|-------------|
| N | -0.22118100 | 1.52966300  | 11.87934900 |
| C | 0.52991300  | 1.95017900  | 13.04118600 |
| C | -1.15941100 | 0.36944300  | 11.98385900 |
| C | 1.13146000  | 3.21795600  | 13.01561600 |
| C | 0.66124200  | 1.10536300  | 14.14398600 |
| H | -0.56692500 | -0.50778000 | 12.24298400 |
| H | -1.54745800 | 0.21001000  | 10.97824900 |
| C | -2.28664900 | 0.57809400  | 12.97281900 |
| C | 1.85466700  | 3.62402800  | 14.13499100 |
| C | 1.39461300  | 1.53203000  | 15.24563900 |
| H | 0.21119800  | 0.12433700  | 14.15761400 |
| C | -2.65189700 | -0.47282900 | 13.81843900 |
| C | -3.01307700 | 1.77158200  | 13.01267200 |
| H | 2.32464300  | 4.60065500  | 14.12937700 |
| C | 1.98611400  | 2.79285500  | 15.24483800 |
| H | 1.50061300  | 0.87573300  | 16.10015000 |
| H | -2.09560500 | -1.40378700 | 13.79498300 |
| C | -3.72964400 | -0.33491500 | 14.69108800 |

|   |             |             |             |
|---|-------------|-------------|-------------|
| C | -4.08310300 | 1.91253100  | 13.89299700 |
| H | -2.75181300 | 2.59529200  | 12.35878100 |
| H | 2.55560900  | 3.12640300  | 16.10388000 |
| H | -4.00358100 | -1.15799400 | 15.34063600 |
| C | -4.44520700 | 0.85984100  | 14.73278600 |
| H | -4.63624200 | 2.84415100  | 13.91914800 |
| H | -5.27937500 | 0.97108500  | 15.41567800 |
| C | 0.90759200  | 3.22830400  | 10.53411300 |
| C | 0.97095400  | 4.09115900  | 11.79954700 |
| H | 0.05624600  | 4.68809300  | 11.87359400 |
| H | 1.80245700  | 4.79286400  | 11.72318000 |
| C | 0.70022500  | 4.02741000  | 9.22907500  |
| H | 0.65663100  | 3.31956400  | 8.38747400  |
| H | 1.60579100  | 4.61858800  | 9.08414500  |
| N | -0.42723800 | 4.95699300  | 9.27299700  |
| C | -0.24521300 | 6.11225200  | 8.36379400  |
| H | 0.77644600  | 6.46993100  | 8.51243400  |
| H | -0.32702600 | 5.80351200  | 7.30893800  |
| C | -1.21558800 | 7.25625400  | 8.63911200  |
| H | -2.25235200 | 6.96586300  | 8.45741300  |
| H | -1.13067600 | 7.59704300  | 9.67408400  |
| H | -0.98376300 | 8.09653100  | 7.97955100  |
| C | -1.72434700 | 4.33344800  | 9.15208900  |
| C | -2.69976900 | 4.60778900  | 10.11572700 |
| C | -2.05049300 | 3.49167200  | 8.07896200  |
| C | -3.97520700 | 4.05213700  | 10.01329300 |
| H | -2.44945900 | 5.26659500  | 10.93880600 |
| C | -3.32135600 | 2.92860300  | 7.98340400  |
| H | -1.31521200 | 3.28072900  | 7.31062800  |
| C | -4.28773600 | 3.20751000  | 8.95004800  |
| H | -4.72189600 | 4.27808400  | 10.76589300 |
| H | -3.55944700 | 2.27891000  | 7.14876000  |
| H | -5.27696300 | 2.77154200  | 8.87239500  |
| H | 1.87848800  | 2.71732000  | 10.40935000 |
| C | -0.05563300 | 2.11171800  | 10.73206000 |
| H | -0.62332400 | 1.71375400  | 9.89924900  |

**int-3b**

**G +ZPE = -1077.650149 a.u**

|   |             |             |             |
|---|-------------|-------------|-------------|
| N | -3.09934800 | 0.99066400  | 12.45182500 |
| C | -2.57999300 | -0.27107900 | 11.97734500 |
| C | -4.04539800 | 1.01675900  | 13.61128600 |
| C | -1.48336200 | -0.24622200 | 11.10283600 |

|   |             |             |             |
|---|-------------|-------------|-------------|
| C | -3.17527700 | -1.47336200 | 12.36202500 |
| H | -4.91836400 | 0.42680800  | 13.33480100 |
| H | -4.37280200 | 2.05178700  | 13.70456500 |
| C | -3.43910800 | 0.52160200  | 14.90739100 |
| C | -0.99252200 | -1.46094100 | 10.62940100 |
| C | -2.66887900 | -2.67189000 | 11.87189000 |
| H | -4.02508400 | -1.49342000 | 13.02688800 |
| C | -4.17210700 | -0.35891700 | 15.70754300 |
| C | -2.19615200 | 0.97860600  | 15.35598400 |
| H | -0.14580900 | -1.45637100 | 9.95286500  |
| C | -1.57597500 | -2.66727100 | 11.00873000 |
| H | -3.13279300 | -3.60474300 | 12.16628600 |
| H | -5.13982100 | -0.71586600 | 15.37137700 |
| C | -3.67139800 | -0.77836000 | 16.93854200 |
| C | -1.69158900 | 0.55089400  | 16.58143100 |
| H | -1.61353800 | 1.66794400  | 14.75593800 |
| H | -1.18077000 | -3.60081400 | 10.62694700 |
| H | -4.25053900 | -1.46033700 | 17.54994800 |
| C | -2.42799100 | -0.32733600 | 17.37591700 |
| H | -0.72494900 | 0.90769600  | 16.91713900 |
| H | -2.03403000 | -0.65751600 | 18.32999700 |
| C | -1.90981100 | 2.18104200  | 10.66743700 |
| C | -0.85613700 | 1.06994700  | 10.72751300 |
| H | -0.09466200 | 1.34305200  | 11.46689400 |
| H | -0.34800400 | 0.98264600  | 9.76780700  |
| C | -1.33174200 | 3.61309100  | 10.42126800 |
| H | -2.10687200 | 4.34282600  | 10.67897400 |
| H | -1.17045500 | 3.72317000  | 9.35201500  |
| N | -0.11127200 | 3.92672000  | 11.13676800 |
| C | -0.28154100 | 4.44670800  | 12.49482100 |
| H | -1.11851000 | 3.91144600  | 12.95182000 |
| H | 0.59201500  | 4.17842500  | 13.09119500 |
| C | -0.54770000 | 5.95506300  | 12.57317900 |
| H | 0.28544400  | 6.52765500  | 12.16093100 |
| H | -1.45110800 | 6.22640100  | 12.02115700 |
| H | -0.68722900 | 6.25610300  | 13.61483600 |
| C | 1.12488300  | 4.00464100  | 10.48775800 |
| C | 1.32505000  | 3.47705300  | 9.19263700  |
| C | 2.24272700  | 4.59801100  | 11.11580300 |
| C | 2.56723200  | 3.54676700  | 8.56977400  |
| H | 0.51873600  | 2.99338200  | 8.65949100  |
| C | 3.48083600  | 4.65132400  | 10.48298200 |
| H | 2.15346200  | 5.03243900  | 12.10091200 |
| C | 3.66177400  | 4.13131000  | 9.20339400  |

|   |             |            |             |
|---|-------------|------------|-------------|
| H | 2.67453800  | 3.12706500 | 7.57533500  |
| H | 4.31098900  | 5.11736300 | 11.00292000 |
| H | 4.62711700  | 4.17953400 | 8.71430400  |
| H | -2.58911200 | 1.99599500 | 9.81759500  |
| C | -2.80402500 | 2.10223900 | 11.85253200 |
| H | -3.29172100 | 2.99420800 | 12.22941700 |

#### TS4

**G +ZPE = -1077.636644 a.u**

|   |             |             |             |
|---|-------------|-------------|-------------|
| N | 0.25605600  | 1.33298800  | 12.39511800 |
| C | -0.21776400 | 2.36581400  | 13.25101700 |
| C | 0.11263900  | -0.08545100 | 12.76686600 |
| C | 0.08665300  | 3.70957800  | 12.95279200 |
| C | -0.98913800 | 2.05992600  | 14.38003200 |
| H | 0.44140400  | -0.20338200 | 13.80089500 |
| H | 0.82589300  | -0.63708600 | 12.15200500 |
| C | -1.27649300 | -0.68098700 | 12.59331400 |
| C | -0.39993000 | 4.70664800  | 13.79782600 |
| C | -1.45320600 | 3.07420400  | 15.21089100 |
| H | -1.24438900 | 1.03624400  | 14.61030000 |
| C | -1.77849100 | -1.54502600 | 13.57089000 |
| C | -2.04160800 | -0.44207500 | 11.44841900 |
| H | -0.16564400 | 5.74041500  | 13.56724800 |
| C | -1.16313600 | 4.40471400  | 14.92225600 |
| H | -2.04784200 | 2.81738500  | 16.07948800 |
| H | -1.19494100 | -1.74156500 | 14.46456200 |
| C | -3.02128600 | -2.15614400 | 13.41079700 |
| C | -3.28648100 | -1.04677900 | 11.28835300 |
| H | -1.66793300 | 0.21369400  | 10.67069700 |
| H | -1.52639500 | 5.19882000  | 15.56344600 |
| H | -3.39643100 | -2.82173500 | 14.17975400 |
| C | -3.78037000 | -1.90602200 | 12.26945300 |
| H | -3.86860300 | -0.84961400 | 10.39539900 |
| H | -4.74913600 | -2.37580200 | 12.14471300 |
| C | 1.07657700  | 2.93764300  | 10.79692800 |
| C | 0.97079200  | 4.07374000  | 11.77688300 |
| H | 0.59262800  | 4.97986800  | 11.29421600 |
| H | 1.97457400  | 4.33723900  | 12.14045000 |
| C | -0.85410000 | 3.16174500  | 9.47823000  |
| H | -1.44505300 | 2.76444900  | 10.28596600 |
| H | -0.45503100 | 2.48501600  | 8.73828500  |
| N | -1.04134600 | 4.42179000  | 9.12228300  |
| C | -0.43474100 | 4.91987100  | 7.85297200  |

|   |             |            |             |
|---|-------------|------------|-------------|
| H | -0.54534800 | 4.11571100 | 7.12415900  |
| H | -1.05442600 | 5.74971400 | 7.51813400  |
| C | 1.03032400  | 5.33902400 | 7.95432600  |
| H | 1.18667200  | 6.13832600 | 8.67987100  |
| H | 1.67294300  | 4.49862900 | 8.21900400  |
| H | 1.35029900  | 5.70506400 | 6.97615000  |
| C | -1.88951100 | 5.30298100 | 9.88287700  |
| C | -1.57654200 | 6.66149800 | 9.98999500  |
| C | -3.05038100 | 4.80657500 | 10.48419300 |
| C | -2.41037100 | 7.50825200 | 10.71419000 |
| H | -0.68363900 | 7.06119600 | 9.52890000  |
| C | -3.87267500 | 5.66112300 | 11.21244200 |
| H | -3.33394300 | 3.76916000 | 10.36278200 |
| C | -3.55638800 | 7.01255400 | 11.33337300 |
| H | -2.15591800 | 8.55798500 | 10.79717500 |
| H | -4.77175900 | 5.26748200 | 11.67102500 |
| H | -4.20195400 | 7.67541600 | 11.89662500 |
| H | 1.71859500  | 3.05554700 | 9.93482500  |
| C | 0.86252900  | 1.65321900 | 11.22710000 |
| H | 1.14080400  | 0.80931700 | 10.60775000 |

**TS4'**

**G +ZPE = -1077.635934 a.u**

|   |             |             |             |
|---|-------------|-------------|-------------|
| N | -2.96709400 | 0.91174600  | 11.47861200 |
| C | -4.08973600 | 1.58968400  | 10.93814400 |
| C | -2.97764100 | -0.54820000 | 11.66527600 |
| C | -4.11665400 | 3.00027400  | 10.92771000 |
| C | -5.17311600 | 0.87221800  | 10.41098900 |
| H | -3.91901400 | -0.82841800 | 12.14183900 |
| H | -2.19003900 | -0.77183400 | 12.38709500 |
| C | -2.76577600 | -1.38056600 | 10.40958500 |
| C | -5.23102800 | 3.64299700  | 10.38696300 |
| C | -6.27401600 | 1.53956700  | 9.88529600  |
| H | -5.15984700 | -0.20742800 | 10.39500700 |
| C | -3.54841800 | -2.51875300 | 10.19518700 |
| C | -1.75897900 | -1.07330200 | 9.48995500  |
| H | -5.25034100 | 4.72794600  | 10.38231700 |
| C | -6.30879600 | 2.93113400  | 9.86846500  |
| H | -7.10004600 | 0.96449500  | 9.48385700  |
| H | -4.33114700 | -2.77347700 | 10.90260400 |
| C | -3.33473300 | -3.33085600 | 9.08204600  |
| C | -1.54640000 | -1.87946100 | 8.37395100  |
| H | -1.12773500 | -0.20645100 | 9.64620600  |

|   |             |             |             |
|---|-------------|-------------|-------------|
| H | -7.16223600 | 3.45629400  | 9.45669200  |
| H | -3.95254700 | -4.20851100 | 8.92987800  |
| C | -2.33484000 | -3.01096900 | 8.16601000  |
| H | -0.76233900 | -1.62632700 | 7.66942400  |
| H | -2.16990800 | -3.63778500 | 7.29725900  |
| C | -1.78120600 | 2.98366500  | 11.81412200 |
| C | -2.99428600 | 3.82161400  | 11.53303100 |
| H | -2.75007800 | 4.66313400  | 10.87219000 |
| H | -3.34123700 | 4.29050600  | 12.46489300 |
| C | -0.48881000 | 3.15639900  | 9.68910800  |
| H | -0.93590900 | 2.24806500  | 9.32082300  |
| H | 0.42391500  | 3.10051900  | 10.25938300 |
| N | -0.84008800 | 4.28454400  | 9.11619500  |
| C | -1.92783500 | 4.23678000  | 8.09401000  |
| H | -2.65960400 | 3.51247800  | 8.45184600  |
| H | -2.41531500 | 5.20886900  | 8.08470900  |
| C | -1.41738400 | 3.84351100  | 6.70936900  |
| H | -0.67758900 | 4.54914300  | 6.32869200  |
| H | -0.96864300 | 2.84828900  | 6.72498200  |
| H | -2.26104200 | 3.82459400  | 6.01628800  |
| C | -0.19725300 | 5.53560300  | 9.42312200  |
| C | -0.25492000 | 6.59319100  | 8.50904600  |
| C | 0.49477200  | 5.69961400  | 10.62850200 |
| C | 0.38364800  | 7.79536700  | 8.79927600  |
| H | -0.77542200 | 6.49172700  | 7.56791800  |
| C | 1.12949900  | 6.90565300  | 10.90565100 |
| H | 0.53094200  | 4.90937400  | 11.36469300 |
| C | 1.07903800  | 7.95855700  | 9.99451900  |
| H | 0.33644600  | 8.60367600  | 8.07972900  |
| H | 1.65571100  | 7.02075500  | 11.84544700 |
| H | 1.57252300  | 8.89688100  | 10.21628100 |
| H | -0.94039600 | 3.43808800  | 12.31996000 |
| C | -1.87647300 | 1.62414600  | 11.87235300 |
| H | -1.04916000 | 1.02885700  | 12.23835900 |

**TS5**

**G +ZPE = -1077.635188 a.u**

|   |            |             |             |
|---|------------|-------------|-------------|
| N | 0.89982000 | 0.71898600  | -1.11909900 |
| C | 1.65225100 | 1.63556800  | -0.29004400 |
| C | 1.61276400 | -0.35810100 | -1.87381900 |
| C | 0.95355000 | 2.38926300  | 0.66652800  |
| C | 3.03156600 | 1.76733800  | -0.45147900 |
| H | 2.29265700 | 0.12876500  | -2.57244200 |

|   |             |             |             |
|---|-------------|-------------|-------------|
| H | 0.84794300  | -0.85957700 | -2.46622600 |
| C | 2.34798600  | -1.34217300 | -0.98982600 |
| C | 1.67804700  | 3.26530800  | 1.47047900  |
| C | 3.73088700  | 2.65576600  | 0.35853500  |
| H | 3.56747900  | 1.19879700  | -1.19615300 |
| C | 3.64156200  | -1.73946000 | -1.33835500 |
| C | 1.73440400  | -1.91273900 | 0.12871300  |
| H | 1.15152000  | 3.85252200  | 2.21378900  |
| C | 3.05696900  | 3.39977300  | 1.32325900  |
| H | 4.80076200  | 2.76162500  | 0.23117100  |
| H | 4.12508400  | -1.30550500 | -2.20716400 |
| C | 4.31445000  | -2.69497000 | -0.57906900 |
| C | 2.41147300  | -2.85991200 | 0.89277900  |
| H | 0.72684000  | -1.62771600 | 0.40797900  |
| H | 3.60167400  | 4.08993500  | 1.95601800  |
| H | 5.31686000  | -2.99607600 | -0.86002400 |
| C | 3.70202900  | -3.25398900 | 0.54066500  |
| H | 1.92744900  | -3.29290700 | 1.76042000  |
| H | 4.22648300  | -3.99248600 | 1.13578600  |
| C | -1.13506100 | 1.94904800  | -0.59342800 |
| C | -0.53920700 | 2.21777100  | 0.79785400  |
| H | -0.75288100 | 1.39367500  | 1.48095400  |
| H | -0.99020300 | 3.11767000  | 1.21723500  |
| C | -2.66796000 | 1.86994300  | -0.74353400 |
| H | -2.86170900 | 2.01728400  | -1.81229700 |
| H | -3.06991700 | 2.75684800  | -0.23913300 |
| N | -3.41949900 | 0.66924200  | -0.32116300 |
| C | -4.56257800 | 0.39697400  | -1.20808300 |
| H | -4.95554600 | 1.36984900  | -1.51289300 |
| H | -4.25509200 | -0.11259800 | -2.13604700 |
| C | -5.68651400 | -0.37922300 | -0.52624300 |
| H | -5.37216700 | -1.38035700 | -0.22502500 |
| H | -6.03321400 | 0.15243700  | 0.36355600  |
| H | -6.52883400 | -0.48628500 | -1.21462700 |
| C | -2.79636700 | -0.44905200 | 0.29985400  |
| C | -2.47602500 | -0.39442400 | 1.66587000  |
| C | -2.58013500 | -1.65834700 | -0.38223300 |
| C | -1.92666100 | -1.49445600 | 2.31842100  |
| H | -2.70041800 | 0.51036400  | 2.21846100  |
| C | -2.05366700 | -2.76721200 | 0.27940300  |
| H | -2.84345800 | -1.74100300 | -1.43032900 |
| C | -1.71676400 | -2.68975800 | 1.62927000  |
| H | -1.69074700 | -1.42718600 | 3.37456000  |
| H | -1.90372200 | -3.69238900 | -0.26575800 |

|   |             |             |             |
|---|-------------|-------------|-------------|
| H | -1.30858600 | -3.55277000 | 2.14205700  |
| H | -0.87244100 | 2.83447500  | -1.20041600 |
| C | -0.38257400 | 0.84951200  | -1.25574600 |
| H | -0.87460600 | 0.15033400  | -1.92024200 |

**TS6**

**G +ZPE = -1077.624254 a.u**

|   |             |             |             |
|---|-------------|-------------|-------------|
| N | -0.81454500 | -0.69134100 | -0.83133600 |
| C | 0.43736100  | -0.19628900 | -1.13564700 |
| C | -2.00681400 | -0.00801200 | -1.36173900 |
| C | 1.61564600  | -1.16274400 | -1.09205200 |
| H | 0.42318500  | 0.46497000  | -1.99283700 |
| C | -0.98132500 | -1.98007400 | -0.23198600 |
| C | -2.82107600 | 0.87872700  | -0.42507300 |
| H | -1.68253600 | 0.59265800  | -2.21440900 |
| H | -2.66419600 | -0.78398500 | -1.76472900 |
| C | 1.13237200  | -2.58890000 | -1.38900000 |
| C | 2.42257400  | -1.11346300 | 0.23823400  |
| H | 2.30878600  | -0.85370800 | -1.87638400 |
| C | 0.29770300  | 2.41831400  | -0.05748200 |
| C | 2.48457600  | 1.27101600  | 0.12505100  |
| C | -0.00593700 | -2.96042200 | -0.48109100 |
| C | -2.11982200 | -2.30661200 | 0.51064000  |
| C | -3.83997600 | 1.64770200  | -1.00141800 |
| C | -2.62620400 | 0.95475400  | 0.95523700  |
| H | 0.79572300  | -2.63681500 | -2.43151300 |
| H | 1.96080600  | -3.29320200 | -1.29212300 |
| N | 3.17525800  | 0.13162700  | 0.30334000  |
| H | 3.12851800  | -1.93999900 | 0.26468900  |
| H | 1.76133900  | -1.22331000 | 1.10173500  |
| C | 0.92101200  | 3.57718700  | -0.41075400 |
| H | -0.77800200 | 2.38672900  | 0.04308000  |
| C | 3.10771600  | 2.51512900  | -0.16964900 |
| C | -0.15977400 | -4.23106200 | 0.06496900  |
| C | -2.26813600 | -3.59118600 | 1.03154300  |
| H | -2.89252500 | -1.57203700 | 0.68593800  |
| C | -4.64437400 | 2.46882900  | -0.21739300 |
| H | -4.00333600 | 1.60317700  | -2.07362400 |
| C | -3.43105700 | 1.77960400  | 1.74385800  |
| H | -1.84186500 | 0.37590400  | 1.42749600  |
| C | 4.64965600  | 0.07608700  | 0.29234800  |
| C | 2.34077700  | 3.61793200  | -0.44769300 |
| H | 0.35085000  | 4.47308200  | -0.62082200 |

|   |             |             |             |
|---|-------------|-------------|-------------|
| H | 4.18417100  | 2.60000900  | -0.18382400 |
| C | -1.28493400 | -4.55320900 | 0.82420300  |
| H | 0.60061800  | -4.98095000 | -0.12537500 |
| H | -3.15491400 | -3.83002600 | 1.60668100  |
| C | -4.44317700 | 2.53696700  | 1.16195800  |
| H | -5.42628200 | 3.05795900  | -0.68305800 |
| H | -3.26135800 | 1.82601600  | 2.81351900  |
| C | 5.26176800  | 0.37083400  | 1.66212500  |
| H | 5.02907800  | 0.76673300  | -0.46201700 |
| H | 4.92752100  | -0.92478100 | -0.03705100 |
| H | 2.83658100  | 4.54959900  | -0.69599600 |
| H | -1.39454500 | -5.54819400 | 1.23894900  |
| H | -5.06824900 | 3.17663500  | 1.77415000  |
| H | 6.35025400  | 0.30188700  | 1.59774300  |
| H | 5.00410600  | 1.37480300  | 2.00662900  |
| H | 4.91550000  | -0.34870900 | 2.40709000  |
| C | 1.03159800  | 1.20083200  | 0.17865800  |
| H | 0.64486600  | 0.57192300  | 0.97495300  |

**int-4**

**G +ZPE = -1077.631733 a.u**

|   |             |            |             |
|---|-------------|------------|-------------|
| N | 2.03144700  | 4.78253400 | 11.58300400 |
| C | 2.50422900  | 3.89047900 | 12.65469300 |
| C | 0.58105500  | 4.99602600 | 11.55055400 |
| C | 4.02335600  | 3.73635300 | 12.63573500 |
| H | 2.21544500  | 4.30335100 | 13.62927600 |
| C | 2.85913500  | 5.80047400 | 11.07100900 |
| C | -0.18059800 | 4.28602300 | 10.43713700 |
| H | 0.16029900  | 4.69126200 | 12.51345900 |
| H | 0.38418700  | 6.07035600 | 11.48592900 |
| C | 4.69984800  | 5.10713500 | 12.64940500 |
| C | 4.44735400  | 2.89742500 | 11.43382100 |
| H | 4.30681500  | 3.18794500 | 13.53932000 |
| C | 0.88047400  | 2.14613300 | 13.64124300 |
| C | 2.73559600  | 1.32086600 | 12.13923000 |
| C | 4.17901500  | 5.98220100 | 11.53723100 |
| C | 2.39179900  | 6.64570600 | 10.04525500 |
| C | -1.57746500 | 4.21259100 | 10.51407500 |
| C | 0.46151200  | 3.72796400 | 9.32942700  |
| H | 4.50500600  | 5.57465600 | 13.62137400 |
| H | 5.78457700  | 4.99678000 | 12.57222300 |
| N | 3.87396500  | 1.53869500 | 11.51642300 |
| H | 5.53019300  | 2.78141700 | 11.41976200 |

|   |             |             |             |
|---|-------------|-------------|-------------|
| H | 4.14720200  | 3.36019500  | 10.48985600 |
| C | 0.56363800  | 0.87813800  | 13.95311800 |
| H | 0.38808700  | 2.97848000  | 14.12979200 |
| C | 2.24041200  | -0.00413400 | 12.38752000 |
| C | 4.97832400  | 6.97713100  | 10.97471800 |
| C | 3.20152400  | 7.64407800  | 9.51378300  |
| H | 1.39725300  | 6.51223300  | 9.64125100  |
| C | -2.31383400 | 3.59894600  | 9.50526300  |
| H | -2.09040200 | 4.63740000  | 11.37146400 |
| C | -0.27600700 | 3.11000600  | 8.31723700  |
| H | 1.54137900  | 3.77784700  | 9.25817500  |
| C | 4.65293500  | 0.45682400  | 10.85983800 |
| C | 1.21651600  | -0.20118100 | 13.26230500 |
| H | -0.17702700 | 0.65456800  | 14.70979000 |
| H | 2.73035300  | -0.85946200 | 11.94911900 |
| C | 4.50467700  | 7.81978700  | 9.97272700  |
| H | 5.99249800  | 7.09393600  | 11.34405100 |
| H | 2.80844400  | 8.27719700  | 8.72608400  |
| C | -1.66404800 | 3.04433300  | 8.40089000  |
| H | -3.39422100 | 3.54883700  | 9.58156100  |
| H | 0.23828300  | 2.68256700  | 7.46376600  |
| C | 4.14007800  | 0.13802900  | 9.45630800  |
| H | 4.64095800  | -0.42351600 | 11.50002900 |
| H | 5.68386900  | 0.80328400  | 10.82049200 |
| H | 0.90542700  | -1.21772300 | 13.47414700 |
| H | 5.14133500  | 8.59055400  | 9.55514300  |
| H | -2.23683100 | 2.56437000  | 7.61568900  |
| H | 4.76495200  | -0.64386400 | 9.01987400  |
| H | 3.10925500  | -0.22101000 | 9.47698500  |
| H | 4.19002000  | 1.01519400  | 8.80864300  |
| C | 1.84069300  | 2.47439300  | 12.53914000 |
| H | 1.19011500  | 2.51511100  | 11.64209800 |

**TS7**

**G +ZPE = -1077.596849 a.u**

|   |             |             |             |
|---|-------------|-------------|-------------|
| N | -0.74785900 | -0.00087800 | -0.68389400 |
| C | 0.60986900  | 0.17397100  | -0.98414000 |
| C | -1.72731700 | 0.72835400  | -1.53696600 |
| C | 1.40084500  | -1.03328100 | -1.35859900 |
| H | 0.76849000  | 1.01856600  | -1.64382400 |
| C | -1.11634400 | -1.23222600 | -0.05749100 |
| C | -3.01922500 | 1.14665100  | -0.86855000 |
| H | -1.21003500 | 1.61739400  | -1.90143800 |

|   |             |             |             |
|---|-------------|-------------|-------------|
| H | -1.96398000 | 0.11061800  | -2.41104600 |
| C | 0.56411800  | -2.28469700 | -1.55890800 |
| C | 2.73727400  | -1.40370000 | 0.08087600  |
| H | 2.10348800  | -0.82853200 | -2.16078800 |
| C | 0.75887200  | 2.15145000  | 0.90080400  |
| C | 2.86066100  | 0.94106800  | 0.39882800  |
| C | -0.46421200 | -2.40802100 | -0.46380400 |
| C | -2.06077200 | -1.27538400 | 0.97225100  |
| C | -4.19360400 | 0.42170800  | -1.09012600 |
| C | -3.07506800 | 2.28365000  | -0.05410600 |
| H | 0.05903500  | -2.20696700 | -2.53197500 |
| H | 1.19599000  | -3.17301900 | -1.60817200 |
| N | 3.50170200  | -0.22255000 | 0.16590200  |
| H | 3.31486400  | -2.25670200 | -0.25092600 |
| H | 2.11334100  | -1.61781400 | 0.94309500  |
| C | 1.41731100  | 3.33903800  | 0.85754400  |
| H | -0.29553900 | 2.10811200  | 1.14055700  |
| C | 3.52265900  | 2.20026100  | 0.36694800  |
| C | -0.77767800 | -3.61375000 | 0.16052900  |
| C | -2.38136700 | -2.49273200 | 1.57022700  |
| H | -2.53370200 | -0.36250900 | 1.30688500  |
| C | -5.39382200 | 0.80814300  | -0.49486400 |
| H | -4.16789900 | -0.45331200 | -1.73080700 |
| C | -4.27093900 | 2.67166300  | 0.54505900  |
| H | -2.18196500 | 2.87867100  | 0.10113700  |
| C | 4.92995600  | -0.28507000 | -0.22281500 |
| C | 2.81449600  | 3.35340200  | 0.57950700  |
| H | 0.90054100  | 4.27006200  | 1.05326200  |
| H | 4.58727600  | 2.25665900  | 0.19548000  |
| C | -1.74161500 | -3.66286900 | 1.16697000  |
| H | -0.26777900 | -4.51992800 | -0.14879400 |
| H | -3.11912300 | -2.52028400 | 2.36369100  |
| C | -5.43367200 | 1.93107900  | 0.32916700  |
| H | -6.29519000 | 0.23376900  | -0.67610000 |
| H | -4.29826600 | 3.55608800  | 1.17143700  |
| C | 5.85848400  | -0.40161900 | 0.98474400  |
| H | 5.16998600  | 0.58932600  | -0.82638900 |
| H | 5.03738700  | -1.15457600 | -0.87065300 |
| H | 3.33676600  | 4.30245700  | 0.54650800  |
| H | -1.98241500 | -4.60744300 | 1.64066400  |
| H | -6.36554100 | 2.23418100  | 0.79271700  |
| H | 6.89255900  | -0.47135900 | 0.63987700  |
| H | 5.77406000  | 0.46818700  | 1.63923700  |
| H | 5.63031800  | -1.29648300 | 1.56749500  |

|   |            |            |             |
|---|------------|------------|-------------|
| C | 1.42065000 | 0.90023600 | 0.60044100  |
| H | 1.06143300 | 0.06644100 | 1.19784600s |

C<sub>1</sub>

**G +ZPE = -1077.240477 a.u**

|   |             |             |             |
|---|-------------|-------------|-------------|
| N | 2.04142500  | 4.56030600  | 11.72204200 |
| C | 2.65656000  | 3.83745800  | 12.86338500 |
| C | 0.58004500  | 4.59348500  | 11.67754700 |
| C | 4.16324400  | 3.66773900  | 12.62759300 |
| C | 2.08791500  | 2.45324500  | 13.08291300 |
| H | 2.50901300  | 4.41963200  | 13.78499500 |
| C | 2.73357200  | 5.64410000  | 11.16126900 |
| C | -0.05473200 | 4.07182600  | 10.39476300 |
| H | 0.21267600  | 3.98003100  | 12.50060000 |
| H | 0.21622400  | 5.61087900  | 11.86998600 |
| C | 4.83213800  | 5.03176800  | 12.46822000 |
| C | 4.42119500  | 2.77750500  | 11.40713500 |
| H | 4.56300900  | 3.17402300  | 13.51729800 |
| C | 1.17138900  | 2.20510200  | 14.10125500 |
| C | 2.58252000  | 1.37751900  | 12.29802800 |
| C | 4.09318500  | 5.89875200  | 11.47303800 |
| C | 2.09767000  | 6.50606500  | 10.24100800 |
| C | -1.32098900 | 4.53189300  | 10.01646200 |
| C | 0.57035200  | 3.10047100  | 9.60873200  |
| H | 4.85796700  | 5.52662700  | 13.44601000 |
| H | 5.87554300  | 4.91430600  | 12.15834000 |
| N | 3.50506400  | 1.63169400  | 11.29225500 |
| H | 5.45204300  | 2.40410400  | 11.47069300 |
| H | 4.35731500  | 3.37888000  | 10.49583400 |
| C | 0.67553700  | 0.92541300  | 14.35083000 |
| H | 0.83660300  | 3.03940800  | 14.71053200 |
| C | 2.08839900  | 0.08396400  | 12.57079600 |
| C | 4.74898500  | 6.96921600  | 10.86544700 |
| C | 2.77437400  | 7.57296900  | 9.65868500  |
| H | 1.06938700  | 6.33270800  | 9.95875100  |
| C | -1.95274100 | 4.03006300  | 8.87984600  |
| H | -1.81528600 | 5.29230100  | 10.61379900 |
| C | -0.05869700 | 2.59994400  | 8.46885700  |
| H | 1.55239100  | 2.74182600  | 9.89463900  |
| C | 3.96796200  | 0.54743300  | 10.42504300 |
| C | 1.14206700  | -0.12803500 | 13.56990000 |
| H | -0.04674200 | 0.75729400  | 15.14053800 |
| H | 2.45681900  | -0.76985500 | 12.02004900 |

|   |             |             |             |
|---|-------------|-------------|-------------|
| C | 4.10999900  | 7.81811500  | 9.96484300  |
| H | 5.79229000  | 7.13874100  | 11.11555400 |
| H | 2.24714900  | 8.20938200  | 8.95599000  |
| C | -1.32211100 | 3.06060800  | 8.10037900  |
| H | -2.93315300 | 4.40001700  | 8.60030000  |
| H | 0.43980500  | 1.84731200  | 7.86737200  |
| C | 4.47239500  | 1.02790700  | 9.06296500  |
| H | 3.12895000  | -0.12610600 | 10.25116800 |
| H | 4.75653800  | -0.04013400 | 10.92306900 |
| H | 0.78593600  | -1.13724700 | 13.74795600 |
| H | 4.64401500  | 8.64464800  | 9.51097900  |
| H | -1.80898400 | 2.67172600  | 7.21305900  |
| H | 4.71174600  | 0.15763100  | 8.44700900  |
| H | 3.70703900  | 1.61115500  | 8.54452300  |
| H | 5.37595300  | 1.63528800  | 9.13883100  |

**int-6**

**G +ZPE = -673.155089 a.u**

|   |             |             |             |
|---|-------------|-------------|-------------|
| C | -2.34165300 | -0.04883300 | -1.47462200 |
| C | -0.78792200 | -1.34919100 | -0.07347700 |
| C | -2.70233700 | -3.34560700 | 0.37041000  |
| C | -3.11761200 | 1.04581500  | -0.75180100 |
| H | -1.40130700 | 0.35471700  | -1.85998400 |
| H | -2.92189500 | -0.37787600 | -2.34273000 |
| C | -0.45875600 | -2.39572600 | 0.72452100  |
| H | -0.06340700 | -0.58340200 | -0.32670300 |
| C | -1.39035100 | -3.50106500 | 0.87151400  |
| C | -3.59062600 | -4.41612100 | 0.39715800  |
| C | -4.29911000 | 1.55036300  | -1.30090500 |
| C | -2.65729800 | 1.58044100  | 0.45763000  |
| H | 0.54270200  | -2.46940700 | 1.12740700  |
| C | -1.02381300 | -4.74194100 | 1.41858500  |
| C | -3.21347100 | -5.64517700 | 0.94412500  |
| H | -4.59346000 | -4.28822500 | 0.00079400  |
| C | -5.00380400 | 2.57331700  | -0.66546600 |
| H | -4.67164200 | 1.14032000  | -2.23430900 |
| C | -3.36035700 | 2.59833300  | 1.09733300  |
| H | -1.74612500 | 1.19799300  | 0.90481000  |
| C | -1.92751000 | -5.80015600 | 1.46158800  |
| H | -0.01688200 | -4.87311200 | 1.80205200  |
| H | -3.91802000 | -6.46856600 | 0.96835500  |
| C | -4.53588400 | 3.09982800  | 0.53627800  |
| H | -5.91847400 | 2.95312600  | -1.10692200 |

|   |             |             |             |
|---|-------------|-------------|-------------|
| H | -2.99071400 | 3.00217200  | 2.03333300  |
| H | -1.62547800 | -6.74917200 | 1.89128300  |
| H | -5.08247200 | 3.89237600  | 1.03467700  |
| C | -3.13909500 | -1.97508400 | -0.10560800 |
| H | -3.91312400 | -2.06473600 | -0.87252300 |
| H | -3.58703500 | -1.41513500 | 0.73451400  |
| N | -2.01676600 | -1.21628000 | -0.66503500 |

**int-6'**

**G +ZPE = -1103.225968 a.u**

|    |             |             |             |
|----|-------------|-------------|-------------|
| C  | -3.56138300 | -0.56324300 | 1.08327900  |
| N  | -2.80794200 | -0.65587800 | -0.19041400 |
| C  | -3.46223600 | -1.81759300 | 1.91347900  |
| C  | -3.22706000 | 0.27978000  | -1.27501400 |
| C  | -1.84300000 | -1.49263300 | -0.35408700 |
| H  | -3.17466500 | 0.30878900  | 1.61808200  |
| H  | -4.59929800 | -0.34987700 | 0.82520600  |
| C  | -4.43810100 | -2.08034300 | 2.87777500  |
| C  | -2.40437100 | -2.70947800 | 1.72293000  |
| C  | -3.16407300 | 1.72904900  | -0.84659100 |
| H  | -4.24474800 | 0.00171500  | -1.55242000 |
| H  | -2.57470900 | 0.08518700  | -2.12532900 |
| C  | -1.34809000 | -2.39869300 | 0.69642100  |
| H  | -1.34445400 | -1.47539500 | -1.31791200 |
| O  | -0.67773700 | -2.41892800 | 5.46679900  |
| C  | -4.35644800 | -3.22652100 | 3.66241500  |
| H  | -5.26323400 | -1.38955400 | 3.01165400  |
| C  | -2.34996700 | -3.87941600 | 2.48778000  |
| C  | -1.92918400 | 2.35536600  | -0.64220900 |
| C  | -4.34054200 | 2.46161800  | -0.66903200 |
| C  | -0.02445900 | -1.74821800 | 1.34240500  |
| H  | -0.98890900 | -3.30971700 | 0.21127600  |
| C  | -0.57402600 | -2.40220100 | 6.91602700  |
| Mg | 0.76275900  | -2.66085200 | 4.06666200  |
| H  | -1.58091500 | -2.63523700 | 5.19840000  |
| C  | -3.31230100 | -4.13159900 | 3.46274000  |
| H  | -5.11460600 | -3.42397000 | 4.41072400  |
| H  | -1.54803500 | -4.58682000 | 2.31680800  |
| C  | -1.87547300 | 3.69149600  | -0.25582900 |
| H  | -1.00790500 | 1.80144400  | -0.78817100 |
| C  | -4.28635700 | 3.80138300  | -0.28708800 |
| H  | -5.30174300 | 1.98737200  | -0.83460700 |
| O  | 0.58243200  | -2.62941500 | 2.19287000  |

|   |             |             |             |
|---|-------------|-------------|-------------|
| H | 0.62794400  | -1.48074700 | 0.49674300  |
| H | -0.34215200 | -0.80738300 | 1.82185200  |
| H | -1.26784300 | -1.66512600 | 7.31806800  |
| H | -0.78891200 | -3.39269800 | 7.31660500  |
| H | 0.44727500  | -2.11620500 | 7.15376900  |
| H | -3.25860900 | -5.03975800 | 4.05176500  |
| C | -3.05447300 | 4.41648700  | -0.07689100 |
| H | -0.91516800 | 4.16916900  | -0.10054500 |
| H | -5.20497800 | 4.36096000  | -0.15530200 |
| H | -3.01108800 | 5.45765100  | 0.22102300  |

**TS8**

**G +ZPE = -1103.221757 a.u**

|    |             |             |             |
|----|-------------|-------------|-------------|
| C  | -3.59398900 | -0.63263600 | 1.08516600  |
| N  | -2.89327300 | -0.70169600 | -0.21517300 |
| C  | -3.43067500 | -1.88513700 | 1.91621800  |
| C  | -3.31441600 | 0.27491900  | -1.24344000 |
| C  | -1.94628600 | -1.57886100 | -0.44475200 |
| H  | -3.21495500 | 0.24512100  | 1.61936200  |
| H  | -4.65036600 | -0.44549700 | 0.87856100  |
| C  | -4.29991500 | -2.12456900 | 2.97871600  |
| C  | -2.39994500 | -2.79463800 | 1.63269100  |
| C  | -3.18703100 | 1.71537000  | -0.79045800 |
| H  | -4.35256600 | 0.05380400  | -1.50120800 |
| H  | -2.70426600 | 0.08859500  | -2.12764400 |
| C  | -1.48482000 | -2.51215400 | 0.51354100  |
| H  | -1.47939400 | -1.52848400 | -1.42250900 |
| O  | -0.82644200 | -2.38181300 | 5.42737700  |
| C  | -4.14742700 | -3.25896200 | 3.77654300  |
| H  | -5.10135900 | -1.42360800 | 3.18646100  |
| C  | -2.27990900 | -3.95246600 | 2.41087100  |
| C  | -1.93575500 | 2.26195500  | -0.48268600 |
| C  | -4.32309100 | 2.52285400  | -0.70058800 |
| C  | 0.16312200  | -1.60538000 | 1.27731100  |
| H  | -0.95657700 | -3.35934300 | 0.09025000  |
| C  | -0.80076700 | -2.26747400 | 6.87588200  |
| Mg | 0.68633500  | -2.53702800 | 4.09522000  |
| H  | -1.71438800 | -2.61627300 | 5.12059600  |
| C  | -3.13791600 | -4.17814600 | 3.48657500  |
| H  | -4.82647800 | -3.43459000 | 4.60233100  |
| H  | -1.50929300 | -4.67599200 | 2.16992000  |
| C  | -1.82717400 | 3.59235600  | -0.08742800 |
| H  | -1.04322400 | 1.64872200  | -0.55246300 |

|   |             |             |             |
|---|-------------|-------------|-------------|
| C | -4.21473100 | 3.85752700  | -0.31085500 |
| H | -5.29663300 | 2.10820100  | -0.93945600 |
| O | 0.67056100  | -2.37510400 | 2.18766700  |
| H | 0.72014900  | -1.53156200 | 0.34002000  |
| H | -0.31412500 | -0.67051000 | 1.58877200  |
| H | -1.49112300 | -1.48505700 | 7.18846400  |
| H | -1.06898300 | -3.22222400 | 7.32721700  |
| H | 0.21546300  | -1.99690300 | 7.15141400  |
| H | -3.03173000 | -5.07740300 | 4.08233100  |
| C | -2.96701500 | 4.39347300  | -0.00171800 |
| H | -0.85367300 | 4.00663300  | 0.14816800  |
| H | -5.10400800 | 4.47393100  | -0.24824000 |
| H | -2.88069800 | 5.43001400  | 0.30308600  |

**TS9**

**G +ZPE = -1103.220292 a.u**

|   |             |             |             |
|---|-------------|-------------|-------------|
| C | -2.12269500 | 0.45767200  | -0.55896600 |
| C | -0.60969900 | -1.26900600 | 0.21531700  |
| C | -2.66624800 | -2.91410500 | 1.22010300  |
| C | -2.69540600 | 1.50866600  | 0.36576400  |
| H | -1.19440600 | 0.79355500  | -1.01955200 |
| H | -2.82813500 | 0.20717400  | -1.35190600 |
| H | 0.16274100  | -0.67779700 | -0.26284700 |
| C | -1.35930600 | -3.39686200 | 1.28871300  |
| C | -3.73666100 | -3.74791200 | 1.55731600  |
| C | -4.02946800 | 1.90531000  | 0.24242900  |
| C | -1.88651900 | 2.11351400  | 1.33488200  |
| C | -1.13532600 | -4.72017400 | 1.68400600  |
| C | -3.50550500 | -5.05566700 | 1.96723700  |
| H | -4.75150900 | -3.37039100 | 1.49624800  |
| C | -4.55100900 | 2.89145700  | 1.07868300  |
| H | -4.66156700 | 1.44776600  | -0.51082400 |
| C | -2.40910700 | 3.09403900  | 2.17284200  |
| H | -0.84596400 | 1.82308800  | 1.43400900  |
| C | -2.20012200 | -5.54512100 | 2.02725600  |
| H | -0.12256700 | -5.10640400 | 1.71675200  |
| H | -4.34047500 | -5.69436100 | 2.22931300  |
| C | -3.74279100 | 3.48454100  | 2.04574400  |
| H | -5.58601300 | 3.19441700  | 0.97280100  |
| H | -1.77537000 | 3.55813000  | 2.91937200  |
| H | -2.01450300 | -6.56756900 | 2.33383600  |
| H | -4.14751600 | 4.25103300  | 2.69632400  |
| C | -2.96034800 | -1.50152100 | 0.78736800  |

|    |             |             |            |
|----|-------------|-------------|------------|
| H  | -3.77699300 | -1.47975400 | 0.06347600 |
| H  | -3.26138200 | -0.87790200 | 1.63358000 |
| N  | -1.80985000 | -0.82011400 | 0.15208300 |
| C  | -0.19872900 | -2.50222300 | 0.92730400 |
| H  | 0.49326700  | -3.02351900 | 0.25531700 |
| C  | 0.65807900  | -2.09407500 | 2.17309000 |
| H  | 0.02862300  | -1.54923400 | 2.88393800 |
| H  | 0.98822500  | -3.01946200 | 2.65123300 |
| O  | 1.76104100  | -1.30896400 | 1.77628900 |
| H  | 1.88812600  | -0.27390500 | 2.24988600 |
| Mg | 3.72880900  | -1.13049900 | 2.35629100 |
| O  | 2.75141200  | 0.50861100  | 2.81853700 |
| C  | 2.86241300  | 1.88852900  | 2.52682900 |
| H  | 2.05848300  | 2.45015000  | 3.01738800 |
| H  | 3.81655700  | 2.28296500  | 2.89278200 |
| H  | 2.80605600  | 2.08687100  | 1.44819500 |

**in-7**

**G +ZPE = -1103.228384 a.u**

|   |             |             |             |
|---|-------------|-------------|-------------|
| C | -0.57164500 | 1.99690000  | -1.73956600 |
| C | 0.84608100  | 0.94511300  | -0.07253800 |
| C | -0.77111700 | -1.33271400 | 0.11075500  |
| C | -1.98659500 | 2.44975900  | -1.45776700 |
| H | 0.14565000  | 2.79941800  | -1.56752700 |
| H | -0.47121100 | 1.66851000  | -2.77548100 |
| H | 1.34113100  | 1.90960500  | -0.02198200 |
| C | 0.31580800  | -1.23505400 | 0.98526800  |
| C | -1.76599900 | -2.28641200 | 0.32948300  |
| C | -2.95844700 | 2.37247300  | -2.45841500 |
| C | -2.32742600 | 2.98483500  | -0.21045400 |
| C | 0.39707700  | -2.11108700 | 2.07132500  |
| C | -1.67441600 | -3.16085600 | 1.40827600  |
| H | -2.61115900 | -2.34574400 | -0.34725900 |
| C | -4.25501700 | 2.82610800  | -2.21837100 |
| H | -2.70086500 | 1.96274600  | -3.42906900 |
| C | -3.62315200 | 3.43113800  | 0.03099400  |
| H | -1.58121300 | 3.05808500  | 0.57335800  |
| C | -0.59025400 | -3.07145800 | 2.27864900  |
| H | 1.23685000  | -2.05623800 | 2.75155600  |
| H | -2.44631900 | -3.90374300 | 1.56953300  |
| C | -4.58899300 | 3.35365400  | -0.97346800 |
| H | -5.00041300 | 2.76517800  | -3.00260100 |
| H | -3.87836100 | 3.84485100  | 0.99959300  |

|    |             |             |             |
|----|-------------|-------------|-------------|
| H  | -0.51120600 | -3.74715200 | 3.12209500  |
| H  | -5.59665500 | 3.70541800  | -0.78501500 |
| C  | -0.85240300 | -0.43228200 | -1.09470000 |
| H  | -0.38890800 | -0.89676200 | -1.97324600 |
| H  | -1.88653400 | -0.20272000 | -1.34752200 |
| N  | -0.15052600 | 0.85353800  | -0.88390900 |
| C  | 1.37219100  | -0.18266700 | 0.70589400  |
| H  | 2.14493500  | -0.65782800 | -0.00355800 |
| C  | 2.18968100  | 0.30824700  | 1.90356000  |
| H  | 2.65477600  | 1.27052600  | 1.68471800  |
| H  | 1.57421700  | 0.40430400  | 2.79817700  |
| O  | 3.25167800  | -0.65038400 | 2.19554800  |
| H  | 3.52190800  | -0.55043800 | 3.11685000  |
| Mg | 4.55364700  | -1.57466000 | 0.87567300  |
| O  | 3.47111600  | -1.47308100 | -0.65184300 |
| C  | 3.34291800  | -2.06939300 | -1.91466900 |
| H  | 2.46078700  | -1.67335500 | -2.43984100 |
| H  | 4.21261600  | -1.87142600 | -2.55826200 |
| H  | 3.21958500  | -3.16100700 | -1.85523100 |

#### TS10

**G +ZPE = -1103.223018 a.u**

|   |             |             |             |
|---|-------------|-------------|-------------|
| C | -2.14170400 | 0.51110900  | -1.28738500 |
| C | -0.72655100 | -0.55513400 | 0.38200500  |
| C | -2.36207100 | -2.81516800 | 0.55749200  |
| C | -3.55464500 | 0.97884000  | -1.00870700 |
| H | -1.42071600 | 1.31033000  | -1.11280500 |
| H | -2.04416700 | 0.19111900  | -2.32699200 |
| H | -0.21441700 | 0.40115400  | 0.41416000  |
| C | -1.26800300 | -2.72141200 | 1.42732800  |
| C | -3.35307400 | -3.77234400 | 0.77443100  |
| C | -4.52446300 | 0.92135400  | -2.01248700 |
| C | -3.89837700 | 1.49830800  | 0.24458900  |
| C | -1.17866200 | -3.61476500 | 2.50063600  |
| C | -3.25446700 | -4.65953600 | 1.84295000  |
| H | -4.20263500 | -3.82559200 | 0.10225900  |
| C | -5.82016300 | 1.37745900  | -1.77044400 |
| H | -4.26620300 | 0.52249300  | -2.98760900 |
| C | -5.19256200 | 1.94832600  | 0.48837600  |
| H | -3.15455000 | 1.55390100  | 1.03219800  |
| C | -2.16272200 | -4.57936200 | 2.70456500  |
| H | -0.33496700 | -3.56462300 | 3.17705700  |
| H | -4.02442400 | -5.40527600 | 2.00084500  |

|    |             |             |             |
|----|-------------|-------------|-------------|
| C  | -6.15619600 | 1.88928700  | -0.51960100 |
| H  | -6.56344400 | 1.32996000  | -2.55773700 |
| H  | -5.44886000 | 2.34930300  | 1.46215800  |
| H  | -2.07566600 | -5.26529200 | 3.53912300  |
| H  | -7.16308700 | 2.24233400  | -0.32913700 |
| C  | -2.45128300 | -1.90626900 | -0.64247700 |
| H  | -2.00729700 | -2.37624900 | -1.52954200 |
| H  | -3.48844800 | -1.67149400 | -0.87968200 |
| N  | -1.73795400 | -0.63063500 | -0.43149100 |
| C  | -0.23625500 | -1.65085000 | 1.17734800  |
| H  | 0.63991400  | -2.17915700 | 0.43066300  |
| C  | 0.56804900  | -1.16693900 | 2.37797400  |
| H  | 1.00089200  | -0.18450300 | 2.18546700  |
| H  | -0.04506000 | -1.11729300 | 3.27876100  |
| O  | 1.67138100  | -2.09121300 | 2.66473600  |
| H  | 1.94357000  | -1.97980000 | 3.58402100  |
| Mg | 2.93737800  | -3.03082200 | 1.34330100  |
| O  | 1.73342500  | -2.83617900 | -0.11787200 |
| C  | 1.55593600  | -3.41766100 | -1.39517800 |
| H  | 0.75373800  | -2.90242100 | -1.93843000 |
| H  | 2.46776600  | -3.32992000 | -1.99652600 |
| H  | 1.28934100  | -4.47948600 | -1.32754900 |

**in-7'**

**G +ZPE = -1103.235332 a.u**

|   |             |             |             |
|---|-------------|-------------|-------------|
| C | -0.53279200 | 1.94673000  | -1.74805800 |
| C | 0.86260700  | 0.92450100  | -0.00032100 |
| C | -0.76429000 | -1.34438900 | 0.12278200  |
| C | -1.94439700 | 2.44354500  | -1.48573800 |
| H | 0.18821600  | 2.75113900  | -1.58976800 |
| H | -0.44003900 | 1.62417500  | -2.79045200 |
| H | 1.39636200  | 1.86887700  | -0.00623200 |
| C | 0.28825000  | -1.20232500 | 1.05069600  |
| C | -1.72082300 | -2.34068300 | 0.29694500  |
| C | -2.91739100 | 2.39488900  | -2.48620200 |
| C | -2.28913000 | 2.95770900  | -0.23000800 |
| C | 0.37006400  | -2.11626600 | 2.11308400  |
| C | -1.63387900 | -3.23598200 | 1.36301500  |
| H | -2.53664600 | -2.42604500 | -0.41359000 |
| C | -4.21338200 | 2.85172300  | -2.24010600 |
| H | -2.66271100 | 1.99675500  | -3.46301200 |
| C | -3.58031400 | 3.41340700  | 0.01819900  |
| H | -1.54422800 | 2.99892400  | 0.55757100  |

|    |             |             |             |
|----|-------------|-------------|-------------|
| C  | -0.57779400 | -3.12530900 | 2.26441300  |
| H  | 1.18218700  | -2.04161400 | 2.82537300  |
| H  | -2.37910900 | -4.01367700 | 1.48191200  |
| C  | -4.54731300 | 3.36026100  | -0.98757800 |
| H  | -4.95907300 | 2.80552000  | -3.02560900 |
| H  | -3.83357300 | 3.81118200  | 0.99441700  |
| H  | -0.49286400 | -3.82010900 | 3.09229600  |
| H  | -5.55361200 | 3.71353600  | -0.79360700 |
| C  | -0.81529400 | -0.45322100 | -1.09834100 |
| H  | -0.32493900 | -0.94662800 | -1.95330700 |
| H  | -1.85048200 | -0.26609200 | -1.38897900 |
| N  | -0.15723800 | 0.83734800  | -0.86667600 |
| C  | 1.20967400  | -0.06133900 | 0.90118700  |
| H  | 2.50343200  | -0.92131700 | -0.43540300 |
| C  | 2.15556000  | 0.31813600  | 1.98820900  |
| H  | 2.58773700  | 1.30174000  | 1.80841900  |
| H  | 1.66879800  | 0.31495800  | 2.96610000  |
| O  | 3.29681000  | -0.63705500 | 2.14266300  |
| H  | 3.56778900  | -0.63275800 | 3.06959000  |
| Mg | 4.57239400  | -1.54616000 | 0.85213700  |
| O  | 3.32811700  | -1.39329200 | -0.68815100 |
| C  | 3.19962200  | -2.04365900 | -1.97565100 |
| H  | 2.73298600  | -1.35678900 | -2.67870600 |
| H  | 4.20172100  | -2.29033100 | -2.31632100 |
| H  | 2.60029700  | -2.95071100 | -1.87851500 |

**in-8**

**G +ZPE = -711.669251 a.u**

|   |             |             |             |
|---|-------------|-------------|-------------|
| C | -1.94922300 | 0.37812500  | -1.12270100 |
| C | -0.73306900 | -1.13985900 | 0.33122200  |
| C | -2.70719600 | -3.14101900 | 0.26843900  |
| C | -3.12026900 | 1.19057400  | -0.61443700 |
| H | -1.01115600 | 0.92249000  | -1.02203000 |
| H | -2.08222300 | 0.12177600  | -2.17473300 |
| H | 0.01512400  | -0.35619600 | 0.37324400  |
| C | -1.56749100 | -3.37973000 | 1.04810100  |
| C | -3.74095600 | -4.08072800 | 0.23619500  |
| C | -4.25764300 | 1.35923900  | -1.40849700 |
| C | -3.06488400 | 1.80225800  | 0.64319200  |
| C | -1.48725100 | -4.56676300 | 1.79179100  |
| C | -3.64735100 | -5.25482000 | 0.97161800  |
| H | -4.62061200 | -3.88876600 | -0.36812500 |
| C | -5.32829800 | 2.12690700  | -0.95197400 |

|   |             |             |             |
|---|-------------|-------------|-------------|
| H | -4.30502400 | 0.89440500  | -2.38730100 |
| C | -4.13569700 | 2.56466500  | 1.10034600  |
| H | -2.18382600 | 1.68921300  | 1.26584800  |
| C | -2.51509900 | -5.49705000 | 1.75274900  |
| H | -0.61972300 | -4.76481100 | 2.40802600  |
| H | -4.45377400 | -5.97752100 | 0.94041100  |
| C | -5.26930400 | 2.72816000  | 0.30311000  |
| H | -6.20433500 | 2.25420600  | -1.57700000 |
| H | -4.08355200 | 3.03624500  | 2.07465500  |
| H | -2.43802900 | -6.40908100 | 2.33213500  |
| H | -6.10085800 | 3.32523700  | 0.65899800  |
| C | -2.86092300 | -1.89499700 | -0.56339700 |
| H | -2.88452700 | -2.13978900 | -1.63061500 |
| H | -3.79960900 | -1.38699300 | -0.33068000 |
| N | -1.78213300 | -0.90734500 | -0.38592500 |
| C | -0.49949600 | -2.36140900 | 1.06661100  |
| C | 0.68614300  | -2.44631100 | 1.70585200  |
| H | 1.39842800  | -1.63223700 | 1.66293600  |
| H | 0.97718700  | -3.31732200 | 2.27695400  |

#### TS11

**G +ZPE = -1655.607731 a.u**

|   |             |             |             |
|---|-------------|-------------|-------------|
| C | -0.52589700 | -2.12956200 | -1.01355000 |
| C | -0.39061100 | -1.92254400 | 1.40656700  |
| C | -2.83175100 | -3.23124900 | 1.85643400  |
| C | -1.47509600 | -1.30573800 | -1.85962700 |
| H | 0.44190000  | -1.63692200 | -0.91694400 |
| H | -0.36034800 | -3.10745600 | -1.47137100 |
| H | 0.51969100  | -1.36638700 | 1.21581100  |
| C | -2.12385100 | -2.74456600 | 2.96725600  |
| C | -4.10394600 | -3.77923200 | 2.02449400  |
| C | -2.00776800 | -1.83761100 | -3.03632400 |
| C | -1.80240500 | 0.00440100  | -1.49073100 |
| C | -2.72159100 | -2.81348700 | 4.23517200  |
| C | -4.68068900 | -3.85353900 | 3.28809000  |
| H | -4.64506600 | -4.15064500 | 1.16087900  |
| C | -2.85388600 | -1.07203300 | -3.83833200 |
| H | -1.75882300 | -2.85190200 | -3.32926900 |
| C | -2.65170800 | 0.76606300  | -2.28847300 |
| H | -1.39823300 | 0.43107100  | -0.57880500 |
| C | -3.98523600 | -3.36736000 | 4.39584300  |
| H | -2.20001100 | -2.42604800 | 5.10137700  |
| H | -5.66865300 | -4.28189800 | 3.40741600  |

|    |             |             |             |
|----|-------------|-------------|-------------|
| C  | -3.17774900 | 0.23008400  | -3.46485200 |
| H  | -3.25916400 | -1.49458900 | -4.75041500 |
| H  | -2.89977200 | 1.77945000  | -1.99472600 |
| H  | -4.43064200 | -3.41436800 | 5.38249300  |
| H  | -3.83640800 | 0.82610400  | -4.08598100 |
| C  | -2.23271900 | -3.20843500 | 0.47188400  |
| H  | -1.94286000 | -4.21856300 | 0.15677900  |
| H  | -2.96038800 | -2.84326900 | -0.25567500 |
| N  | -1.03130500 | -2.36411800 | 0.35825400  |
| C  | -0.80101300 | -2.14056700 | 2.74851000  |
| C  | 0.04657600  | -1.69901000 | 3.73810400  |
| H  | 1.03269700  | -1.33913500 | 3.47640100  |
| H  | -0.09101000 | -1.99526900 | 4.76834000  |
| H  | -0.36833500 | -0.08362100 | 4.21753800  |
| C  | -1.37691200 | 1.70476600  | 6.82467900  |
| C  | -1.89270200 | 2.93862100  | 6.28221300  |
| C  | -1.09610000 | 3.61881000  | 5.36786100  |
| C  | 0.17268000  | 3.07320400  | 4.97868800  |
| C  | 0.77412200  | 1.97561300  | 5.67146700  |
| C  | -0.03973300 | 1.29997300  | 6.62812700  |
| H  | -2.01454600 | 1.11096200  | 7.46807400  |
| H  | -1.47229100 | 4.49971200  | 4.86374700  |
| H  | 0.72526400  | 3.56615200  | 4.19051800  |
| H  | 0.33102700  | 0.41230800  | 7.12374700  |
| C  | 2.21142500  | 1.54584200  | 5.44775500  |
| H  | 2.25716300  | 0.47416400  | 5.66609700  |
| C  | 2.72192200  | 1.76049300  | 4.01766100  |
| H  | 3.71725100  | 1.32193200  | 3.91621000  |
| H  | 2.06544700  | 1.29044200  | 3.28237200  |
| H  | 2.80855200  | 2.82234900  | 3.77151100  |
| C  | 3.10818500  | 2.27270200  | 6.47194600  |
| H  | 2.78201800  | 2.08242700  | 7.49721400  |
| H  | 4.14034800  | 1.92732400  | 6.37414600  |
| H  | 3.09423200  | 3.35355800  | 6.30440200  |
| C  | -3.27037700 | 3.40117200  | 6.65523900  |
| H  | -3.98228100 | 2.57295000  | 6.63341800  |
| H  | -3.26210900 | 3.79534600  | 7.67677200  |
| H  | -3.62337900 | 4.18680600  | 5.98724300  |
| Ru | -1.05668900 | 1.33137200  | 4.66510000  |
| Cl | -1.61764200 | 1.48442500  | 2.30039500  |

int-9

G +ZPE = -712.427423 a.u

|   |             |             |             |
|---|-------------|-------------|-------------|
| C | -2.17742300 | 0.11607700  | -1.33896800 |
| C | -0.93868600 | -1.13604200 | 0.38143800  |
| C | -2.77972500 | -3.23028900 | 0.33495600  |
| C | -3.15024300 | 1.14311200  | -0.77164500 |
| H | -1.19741200 | 0.57512300  | -1.49317800 |
| H | -2.53612100 | -0.20247800 | -2.32280700 |
| H | -0.22616900 | -0.32032800 | 0.31970700  |
| C | -1.62431300 | -3.32382700 | 1.14597100  |
| C | -3.59042000 | -4.34269900 | 0.13729000  |
| C | -4.30131200 | 1.49353100  | -1.48195800 |
| C | -2.91067700 | 1.75977100  | 0.46289900  |
| C | -1.34786200 | -4.55548500 | 1.76503100  |
| C | -3.29997500 | -5.56104900 | 0.75666100  |
| H | -4.46870100 | -4.25585100 | -0.49522800 |
| C | -5.19274700 | 2.44206600  | -0.97895400 |
| H | -4.50221400 | 1.02137600  | -2.43848200 |
| C | -3.79946700 | 2.70410300  | 0.97028300  |
| H | -2.02479000 | 1.50087200  | 1.03264200  |
| C | -2.17900900 | -5.65832800 | 1.57776300  |
| H | -0.47017800 | -4.65473600 | 2.39259400  |
| H | -3.94542500 | -6.41808100 | 0.60202700  |
| C | -4.94392800 | 3.04945500  | 0.24946700  |
| H | -6.08020600 | 2.70200800  | -1.54518600 |
| H | -3.59854400 | 3.17383100  | 1.92674900  |
| H | -1.94411300 | -6.59649500 | 2.06889300  |
| H | -5.63489400 | 3.78553300  | 0.64453600  |
| C | -3.16370700 | -1.88029100 | -0.22909900 |
| H | -3.73894400 | -1.99864400 | -1.15119400 |
| H | -3.81681400 | -1.35167700 | 0.48932700  |
| N | -1.97891400 | -1.07348600 | -0.51674400 |
| C | -0.73691800 | -2.16437400 | 1.24562800  |
| C | 0.45967600  | -2.17977700 | 2.16108200  |
| H | 0.17110100  | -2.31259200 | 3.21021200  |
| H | 1.15451500  | -2.99367600 | 1.92014000  |
| H | 1.01400100  | -1.24155200 | 2.08846300  |

## TS12

**G +ZPE = -1116.909685 a.u**

|   |             |             |            |
|---|-------------|-------------|------------|
| C | -2.25981400 | -1.37785500 | 8.61889300 |
| C | 0.27711400  | -2.48789500 | 5.98172300 |
| C | -1.39639200 | -0.85490200 | 9.60071200 |
| C | -3.61039500 | -1.56727600 | 8.90571900 |
| H | -0.16448900 | -3.48580700 | 5.90991600 |

|   |             |             |             |
|---|-------------|-------------|-------------|
| H | 1.34669100  | -2.61207100 | 6.15301300  |
| C | 0.03066200  | -1.72232500 | 4.69400300  |
| C | -1.93108700 | -0.52954900 | 10.85812800 |
| C | -4.12983900 | -1.22929900 | 10.15384700 |
| H | -4.26375700 | -1.98224100 | 8.14520700  |
| C | -0.97523500 | -2.12250900 | 3.81005900  |
| C | 0.81330000  | -0.60841500 | 4.36798600  |
| H | -1.28275500 | -0.13976100 | 11.63297500 |
| C | -3.28398700 | -0.70817400 | 11.13078200 |
| H | -5.18321200 | -1.37653600 | 10.36080400 |
| H | -1.57966700 | -2.99312800 | 4.04219600  |
| C | -1.20492500 | -1.41788100 | 2.62842800  |
| C | 0.58608200  | 0.09700600  | 3.18906600  |
| H | 1.61368500  | -0.29660100 | 5.03097700  |
| H | -3.67419600 | -0.44735200 | 12.10780900 |
| H | -1.98829600 | -1.74067200 | 1.95233100  |
| C | -0.42637600 | -0.30538200 | 2.31725600  |
| H | 1.20315600  | 0.95462100  | 2.94660100  |
| H | -0.60169700 | 0.24207400  | 1.39828600  |
| C | 0.49170700  | -1.34320100 | 8.13994100  |
| C | 0.04003300  | -0.71281500 | 9.29561300  |
| C | 0.09875500  | 1.46367200  | 8.23010900  |
| H | -0.97580000 | 1.37594400  | 8.23913200  |
| H | 0.62953600  | 1.16611600  | 7.34141800  |
| N | 0.64428700  | 2.35693900  | 9.03859000  |
| C | -0.24810700 | 3.02735300  | 10.02719200 |
| H | -1.01546300 | 2.30291300  | 10.29477600 |
| H | 0.33066900  | 3.22619700  | 10.92701100 |
| C | -0.89174900 | 4.29723200  | 9.47196500  |
| H | -0.14989800 | 5.04220900  | 9.18138000  |
| H | -1.51136900 | 4.07049000  | 8.60182100  |
| H | -1.53209600 | 4.73484400  | 10.24095400 |
| C | 2.03291800  | 2.71256700  | 8.96471500  |
| C | 2.93348100  | 1.92542200  | 8.23390700  |
| C | 2.50494000  | 3.85412400  | 9.62431900  |
| C | 4.27489600  | 2.28437100  | 8.15966900  |
| H | 2.61203800  | 1.02375800  | 7.73273600  |
| C | 3.85063500  | 4.20164100  | 9.54305700  |
| H | 1.84041000  | 4.48714100  | 10.19325800 |
| C | 4.74307000  | 3.42348800  | 8.81135200  |
| H | 4.95596800  | 1.65984800  | 7.59410700  |
| H | 4.19505000  | 5.09117600  | 10.05665700 |
| H | 5.78929300  | 3.69745200  | 8.75230600  |
| H | 1.55729900  | -1.46592100 | 7.97946500  |

|   |             |             |             |
|---|-------------|-------------|-------------|
| N | -0.28612100 | -1.83617900 | 7.17704900  |
| C | -1.75031700 | -1.71813100 | 7.23522900  |
| H | -2.07028400 | -0.96057200 | 6.50887000  |
| H | -2.17702900 | -2.66852600 | 6.90055400  |
| C | 1.02793800  | -0.47247700 | 10.41031600 |
| H | 2.05389400  | -0.52874700 | 10.04311900 |
| H | 0.90293300  | 0.50914600  | 10.87657500 |
| H | 0.91389500  | -1.21881700 | 11.20359100 |

**TS12'**

**G +ZPE = -1116.906388 a.u**

|   |             |             |             |
|---|-------------|-------------|-------------|
| C | -1.09765700 | 2.69140300  | -0.16339600 |
| C | -3.17542400 | -0.04349700 | 1.53481300  |
| C | 0.17928700  | 2.39304700  | 0.34365200  |
| C | -1.31011400 | 3.86967300  | -0.87846900 |
| H | -3.92257400 | 0.67796100  | 1.87502600  |
| H | -2.85544500 | -0.62416700 | 2.39992900  |
| C | -3.76989600 | -0.95008100 | 0.47431100  |
| C | 1.22254400  | 3.30212600  | 0.10492300  |
| C | -0.26437500 | 4.75838000  | -1.11468600 |
| H | -2.30335600 | 4.09432700  | -1.25331100 |
| C | -4.89267400 | -0.55358600 | -0.25777900 |
| C | -3.20496600 | -2.20530400 | 0.22101400  |
| H | 2.21233400  | 3.09925200  | 0.49400000  |
| C | 1.00581500  | 4.46993100  | -0.61992500 |
| H | -0.44221100 | 5.66861800  | -1.67501900 |
| H | -5.35300100 | 0.40850100  | -0.05937100 |
| C | -5.43285800 | -1.38828100 | -1.23584700 |
| C | -3.74325600 | -3.04105700 | -0.75424000 |
| H | -2.35047200 | -2.53874700 | 0.80021900  |
| H | 1.82735300  | 5.15577900  | -0.79161700 |
| H | -6.30416700 | -1.06827600 | -1.79552700 |
| C | -4.85733900 | -2.63178800 | -1.48771000 |
| H | -3.29977900 | -4.01333300 | -0.93564200 |
| H | -5.27826100 | -3.28286000 | -2.24518900 |
| C | -0.78920100 | 0.49719600  | 1.53656300  |
| C | 0.38334100  | 1.14753300  | 1.12074800  |
| C | 0.92504800  | -0.23750400 | -0.50029400 |
| H | 1.42629600  | 0.60756000  | -0.95115600 |
| H | -0.09523100 | -0.42696700 | -0.80552900 |
| N | 1.68536700  | -1.30406100 | -0.23192100 |
| C | 1.07541200  | -2.64319300 | -0.04284100 |
| H | 0.00850100  | -2.52714500 | -0.23427600 |

|   |             |             |             |
|---|-------------|-------------|-------------|
| H | 1.47930200  | -3.29113000 | -0.82586500 |
| C | 1.29660600  | -3.28210600 | 1.32607900  |
| H | 2.34749400  | -3.51407000 | 1.50246400  |
| H | 0.93703000  | -2.64433200 | 2.13571600  |
| H | 0.74042500  | -4.22201800 | 1.36262100  |
| C | 3.12163800  | -1.22505000 | -0.37506400 |
| C | 3.97051000  | -1.37052600 | 0.72318200  |
| C | 3.65365700  | -1.02396600 | -1.65131100 |
| C | 5.35090500  | -1.31135500 | 0.53984100  |
| H | 3.56042700  | -1.50840500 | 1.71429700  |
| C | 5.03384900  | -0.95775000 | -1.82509000 |
| H | 2.98744600  | -0.92735900 | -2.50056000 |
| C | 5.88471900  | -1.10387500 | -0.73076400 |
| H | 6.00715600  | -1.41884400 | 1.39530500  |
| H | 5.44160300  | -0.79872500 | -2.81633700 |
| H | 6.95857300  | -1.05538000 | -0.86719400 |
| H | -0.72609300 | -0.28065900 | 2.28959000  |
| N | -2.00412200 | 0.72546900  | 1.06540100  |
| C | -2.26244700 | 1.74944900  | 0.04098300  |
| H | -2.52149300 | 1.24271300  | -0.89564900 |
| H | -3.15081600 | 2.30903200  | 0.34921900  |
| C | 1.58177700  | 1.04509400  | 2.04368600  |
| H | 1.58433000  | 0.09054900  | 2.57215100  |
| H | 2.52593500  | 1.12411400  | 1.50341100  |
| H | 1.56585500  | 1.84150100  | 2.79516300  |

**int-10a**

**G +ZPE = -1116.920512 a.u**

|   |             |             |             |
|---|-------------|-------------|-------------|
| C | -2.28080000 | -1.24749400 | 8.16982200  |
| C | 1.22138100  | -1.82989100 | 6.71185800  |
| C | -2.03134200 | -0.25627800 | 9.12352100  |
| C | -3.59277800 | -1.56485400 | 7.80850800  |
| H | 1.37259400  | -2.87653400 | 6.98184700  |
| H | 2.12637100  | -1.27848700 | 6.96254100  |
| C | 0.87524400  | -1.69643900 | 5.24697400  |
| C | -3.11868700 | 0.39535000  | 9.71867100  |
| C | -4.66430800 | -0.91204900 | 8.40594000  |
| H | -3.77178900 | -2.32738400 | 7.05836300  |
| C | 0.56167900  | -2.82893800 | 4.48982300  |
| C | 0.89166900  | -0.44145600 | 4.62800500  |
| H | -2.95721600 | 1.16019700  | 10.46727700 |
| C | -4.42429000 | 0.06885600  | 9.36649100  |
| H | -5.67889900 | -1.16487600 | 8.12233900  |

|   |             |             |             |
|---|-------------|-------------|-------------|
| H | 0.55760100  | -3.80687500 | 4.95889300  |
| C | 0.26110800  | -2.70924100 | 3.13374100  |
| C | 0.58772700  | -0.32192200 | 3.27500800  |
| H | 1.15122600  | 0.44146000  | 5.20120000  |
| H | -5.25184300 | 0.58316800  | 9.84038700  |
| H | 0.02227200  | -3.59384700 | 2.55519000  |
| C | 0.27087800  | -1.45575200 | 2.52598200  |
| H | 0.60516600  | 0.65371700  | 2.80355300  |
| H | 0.03800500  | -1.36168600 | 1.47166000  |
| C | 0.37073400  | -0.39020000 | 8.47317300  |
| C | -0.59442200 | 0.07736400  | 9.51017300  |
| C | -0.41232300 | 1.62933100  | 9.74559900  |
| H | -0.90267900 | 1.86273500  | 10.69036200 |
| H | -0.96493900 | 2.16628500  | 8.97493600  |
| N | 0.96215000  | 2.09285400  | 9.82130100  |
| C | 1.47381200  | 2.38557400  | 11.17159500 |
| H | 1.03883400  | 1.64939500  | 11.84698500 |
| H | 2.54967800  | 2.20446600  | 11.19216700 |
| C | 1.15105600  | 3.79572100  | 11.67700700 |
| H | 1.58693000  | 4.56354100  | 11.03493900 |
| H | 0.07091200  | 3.95941600  | 11.71828900 |
| H | 1.55056400  | 3.92909900  | 12.68588000 |
| C | 1.57337200  | 2.67282300  | 8.70172100  |
| C | 0.97591300  | 2.63416100  | 7.42253800  |
| C | 2.84076100  | 3.29095900  | 8.79865800  |
| C | 1.61310800  | 3.18607100  | 6.31211400  |
| H | 0.00238700  | 2.18745000  | 7.27374400  |
| C | 3.46444200  | 3.83162500  | 7.68074200  |
| H | 3.34801400  | 3.35651900  | 9.75012000  |
| C | 2.86165700  | 3.78905500  | 6.42375500  |
| H | 1.11300800  | 3.14392000  | 5.35068400  |
| H | 4.43640400  | 4.29752100  | 7.80121900  |
| H | 3.35124100  | 4.21774200  | 5.55790600  |
| H | 1.36961100  | 0.03186600  | 8.49144000  |
| N | 0.14411700  | -1.31929900 | 7.61650500  |
| C | -1.15424200 | -2.01861000 | 7.53767900  |
| H | -1.35356200 | -2.20697300 | 6.48327400  |
| H | -1.01145300 | -2.99108000 | 8.02191700  |
| C | -0.19023300 | -0.70043500 | 10.80449700 |
| H | 0.85170900  | -0.51620900 | 11.07168300 |
| H | -0.82924900 | -0.37023800 | 11.62550900 |
| H | -0.32829800 | -1.77446000 | 10.67176400 |

int-10b

**G +ZPE = -1116.919487 a.u**

|   |             |             |             |
|---|-------------|-------------|-------------|
| C | -3.78689700 | 2.20812400  | 7.00870700  |
| C | -1.83538200 | 5.45871700  | 6.32033800  |
| C | -2.84027500 | 1.45787000  | 7.71107100  |
| C | -5.09654300 | 1.73751600  | 6.86998000  |
| H | -1.89832900 | 5.44936600  | 5.23124400  |
| H | -0.80315900 | 5.66252700  | 6.60068400  |
| C | -2.78316500 | 6.48099900  | 6.90529500  |
| C | -3.22624000 | 0.22375700  | 8.25149400  |
| C | -5.46881700 | 0.51591700  | 7.41597500  |
| H | -5.82343900 | 2.33270200  | 6.32797300  |
| C | -3.75892600 | 7.07800700  | 6.10160900  |
| C | -2.67578200 | 6.86166200  | 8.24784100  |
| H | -2.50699600 | -0.38493700 | 8.78533000  |
| C | -4.52648600 | -0.24566100 | 8.10626600  |
| H | -6.48562300 | 0.15932100  | 7.30303800  |
| H | -3.84183500 | 6.79832100  | 5.05689600  |
| C | -4.62128800 | 8.03585300  | 6.63290300  |
| C | -3.53931300 | 7.81532400  | 8.77902800  |
| H | -1.91114400 | 6.42221000  | 8.87896500  |
| H | -4.80316800 | -1.20306800 | 8.53148600  |
| H | -5.37210100 | 8.49420300  | 6.00008800  |
| C | -4.51432400 | 8.40308600  | 7.97239100  |
| H | -3.44698500 | 8.10513700  | 9.81913500  |
| H | -5.18358500 | 9.14829200  | 8.38636000  |
| C | -1.27040100 | 3.37755500  | 7.42912000  |
| C | -1.41506900 | 1.96597700  | 7.87327000  |
| C | -0.96745600 | 1.90387000  | 9.38730200  |
| H | -0.95045600 | 0.84916600  | 9.66188700  |
| H | -1.74683200 | 2.37648600  | 9.99064500  |
| N | 0.33297900  | 2.52795500  | 9.64173400  |
| C | 0.24484800  | 3.71111400  | 10.53109600 |
| H | -0.61521800 | 4.29747500  | 10.19644400 |
| H | 0.03103800  | 3.40366500  | 11.56692800 |
| C | 1.48849100  | 4.59233300  | 10.50163400 |
| H | 2.36891700  | 4.06392200  | 10.87214000 |
| H | 1.70054900  | 4.93988300  | 9.48707900  |
| H | 1.32989300  | 5.46631600  | 11.13860100 |
| C | 1.39483700  | 1.61628500  | 9.99972400  |
| C | 2.59048600  | 1.64267500  | 9.27788800  |
| C | 1.26832800  | 0.72239100  | 11.07077900 |
| C | 3.64001700  | 0.78757200  | 9.61299100  |
| H | 2.68854600  | 2.33717600  | 8.45196300  |

|   |             |             |             |
|---|-------------|-------------|-------------|
| C | 2.31395800  | -0.13763800 | 11.40025300 |
| H | 0.35122600  | 0.69818500  | 11.64942500 |
| C | 3.50351700  | -0.10721500 | 10.67262200 |
| H | 4.56095800  | 0.81801000  | 9.04171800  |
| H | 2.20100300  | -0.82773700 | 12.22887400 |
| H | 4.31660300  | -0.77626600 | 10.92988600 |
| H | -0.32771900 | 3.85964100  | 7.66945600  |
| N | -2.13165100 | 4.06188100  | 6.76999000  |
| C | -3.43529700 | 3.51435200  | 6.34869000  |
| H | -4.18431700 | 4.27667000  | 6.56687400  |
| H | -3.38799500 | 3.40706700  | 5.25984100  |
| C | -0.42366600 | 1.14072600  | 7.00103500  |
| H | 0.59492300  | 1.51449500  | 7.10944200  |
| H | -0.44714200 | 0.09987300  | 7.32831500  |
| H | -0.70630000 | 1.17864500  | 5.94772300  |

**TS13**

**G +ZPE = -1116.891526 a.u**

|   |             |            |             |
|---|-------------|------------|-------------|
| C | 1.76829500  | 5.28551000 | 11.70674900 |
| C | -0.46239100 | 3.94403500 | 14.07406800 |
| C | 2.04903500  | 4.12493400 | 10.97816100 |
| C | 2.76592900  | 6.23415200 | 11.93825500 |
| H | 0.49098900  | 3.84762400 | 14.60846400 |
| H | -0.95478500 | 2.97017900 | 14.14378200 |
| C | -1.31132200 | 4.98738600 | 14.77970400 |
| C | 3.34705200  | 3.93886700 | 10.48660700 |
| C | 4.05060300  | 6.04243900 | 11.43973100 |
| H | 2.53363900  | 7.12295000 | 12.51526300 |
| C | -1.11392200 | 5.18883700 | 16.15041800 |
| C | -2.31110800 | 5.72040400 | 14.13298600 |
| H | 3.59695300  | 3.05148100 | 9.91971700  |
| C | 4.33934800  | 4.88928600 | 10.71309100 |
| H | 4.82129400  | 6.78189000 | 11.62354300 |
| H | -0.33215800 | 4.63912900 | 16.66448200 |
| C | -1.90749400 | 6.08534000 | 16.86223300 |
| C | -3.10123500 | 6.62484800 | 14.84170400 |
| H | -2.47054600 | 5.60344900 | 13.06797300 |
| H | 5.33720800  | 4.72473300 | 10.32344600 |
| H | -1.73997400 | 6.22593700 | 17.92401300 |
| C | -2.90569100 | 6.80719400 | 16.20911400 |
| H | -3.86837100 | 7.18748800 | 14.32196200 |
| H | -3.51994600 | 7.51053800 | 16.75938100 |
| C | -0.17539700 | 3.15783300 | 11.76110600 |

|   |             |            |             |
|---|-------------|------------|-------------|
| C | 0.92920600  | 3.11983600 | 10.67054900 |
| C | 0.38112400  | 3.51150800 | 9.25012200  |
| H | 1.21016500  | 3.52433800 | 8.54697500  |
| H | -0.03268700 | 4.52304500 | 9.27581400  |
| N | -0.60739400 | 2.55320200 | 8.77411300  |
| C | -0.34713300 | 1.80326800 | 7.53033700  |
| H | 0.72119100  | 1.87735500 | 7.33199900  |
| H | -0.55918000 | 0.74638700 | 7.69838400  |
| C | -1.14297500 | 2.34144000 | 6.34057600  |
| H | -2.21871400 | 2.26944500 | 6.51435200  |
| H | -0.89407600 | 3.38692200 | 6.14596800  |
| H | -0.90226000 | 1.75952700 | 5.44779400  |
| C | -1.64900700 | 2.29226400 | 9.58330300  |
| C | -1.82661800 | 3.15442200 | 10.74049900 |
| C | -2.52705600 | 1.18939500 | 9.39768300  |
| C | -2.91796100 | 2.85514100 | 11.63646600 |
| H | -1.70267400 | 4.21139600 | 10.51531000 |
| C | -3.50971000 | 0.93490200 | 10.32145300 |
| H | -2.42797000 | 0.54498900 | 8.53662200  |
| C | -3.70872400 | 1.76013800 | 11.46180700 |
| H | -3.08905800 | 3.52203500 | 12.47223900 |
| H | -4.15495600 | 0.07647000 | 10.17344300 |
| H | -4.50143800 | 1.52835900 | 12.16149200 |
| H | -0.29981300 | 2.19956900 | 12.25061400 |
| N | -0.19762200 | 4.19292200 | 12.65247800 |
| C | 0.37328500  | 5.47691900 | 12.24824000 |
| H | -0.27250300 | 5.95316700 | 11.49889900 |
| H | 0.38151000  | 6.14062500 | 13.11066000 |
| C | 1.45412300  | 1.66742600 | 10.62615900 |
| H | 2.13050300  | 1.50853900 | 9.78548700  |
| H | 1.98934600  | 1.43037300 | 11.54756200 |
| H | 0.63294700  | 0.95619900 | 10.52328300 |

#### TS14

**G +ZPE = -1116.900475 a.u**

|   |             |             |            |
|---|-------------|-------------|------------|
| C | -3.94088000 | 2.16963200  | 7.50306800 |
| C | -1.50447100 | 4.43792100  | 5.73516400 |
| C | -3.08714900 | 1.19949600  | 8.03242100 |
| C | -5.29244700 | 1.88595400  | 7.29437600 |
| H | -1.96464800 | 4.11931500  | 4.79847600 |
| H | -0.42699100 | 4.30324800  | 5.65203000 |
| C | -1.86362500 | 5.87256900  | 6.04618500 |
| C | -3.60879000 | -0.05771500 | 8.35416900 |

|   |             |             |             |
|---|-------------|-------------|-------------|
| C | -5.80401100 | 0.63705800  | 7.62754200  |
| H | -5.94058600 | 2.64362600  | 6.86842500  |
| C | -2.88697500 | 6.50773100  | 5.33627100  |
| C | -1.16248400 | 6.59061300  | 7.02195300  |
| H | -2.96813800 | -0.82762200 | 8.76330000  |
| C | -4.95820700 | -0.33557700 | 8.15764800  |
| H | -6.85331500 | 0.42121200  | 7.46602500  |
| H | -3.42482600 | 5.96710200  | 4.56498800  |
| C | -3.21389500 | 7.83601200  | 5.60411800  |
| C | -1.49114600 | 7.91582900  | 7.29204300  |
| H | -0.35005900 | 6.12190300  | 7.56543500  |
| H | -5.34617600 | -1.31393000 | 8.41523700  |
| H | -4.00688700 | 8.31829500  | 5.04486600  |
| C | -2.51905800 | 8.54013800  | 6.58480600  |
| H | -0.94072300 | 8.46306000  | 8.04823300  |
| H | -2.77135600 | 9.57324600  | 6.79362400  |
| C | -1.19215300 | 2.59718400  | 7.29354100  |
| C | -1.61018000 | 1.54952100  | 8.28791200  |
| C | -1.59135300 | 2.08903300  | 9.77143800  |
| H | -2.00774400 | 1.24692800  | 10.33780100 |
| H | -2.33069700 | 2.89452700  | 9.83504600  |
| N | -0.35170000 | 2.53060600  | 10.44246800 |
| C | -0.42307500 | 2.26079200  | 11.88993400 |
| H | -1.45886300 | 2.44072200  | 12.18834300 |
| H | -0.21706800 | 1.20324200  | 12.12105800 |
| C | 0.47828900  | 3.17251500  | 12.71828000 |
| H | 1.53567200  | 3.02015200  | 12.49389100 |
| H | 0.23648100  | 4.22192700  | 12.53180300 |
| H | 0.32870400  | 2.96777600  | 13.78147200 |
| C | 0.93502100  | 2.45777600  | 9.83762000  |
| C | 1.32391900  | 3.45612800  | 8.93431400  |
| C | 1.86764600  | 1.46054400  | 10.16591000 |
| C | 2.57728200  | 3.42707900  | 8.32389300  |
| H | 0.64490100  | 4.27988600  | 8.75106900  |
| C | 3.12916400  | 1.44720200  | 9.57649300  |
| H | 1.60248400  | 0.68681100  | 10.87638100 |
| C | 3.48610300  | 2.41989800  | 8.64167600  |
| H | 2.85160600  | 4.20914000  | 7.62488000  |
| H | 3.83343900  | 0.66633100  | 9.84125700  |
| H | 4.46723700  | 2.40242800  | 8.18186600  |
| H | -0.16563100 | 2.60636400  | 6.94718800  |
| N | -1.97835300 | 3.47251300  | 6.77828500  |
| C | -3.40890900 | 3.53324300  | 7.15175700  |
| H | -3.49894000 | 4.23859700  | 7.98310600  |

|   |             |             |            |
|---|-------------|-------------|------------|
| H | -3.95012400 | 3.95795100  | 6.30829400 |
| C | -0.68857100 | 0.32442000  | 8.09641600 |
| H | 0.36054300  | 0.61394000  | 8.09579800 |
| H | -0.82853500 | -0.39034700 | 8.90702900 |
| H | -0.91193100 | -0.17551500 | 7.15209700 |

**int-11**

**G +ZPE = -1116.893169 a.u**

|   |             |            |             |
|---|-------------|------------|-------------|
| C | 2.06673100  | 4.73741700 | 12.30326300 |
| C | -1.38665900 | 4.07597900 | 13.64661000 |
| C | 2.07264900  | 4.02023400 | 11.10740200 |
| C | 3.16187200  | 5.54586400 | 12.62905300 |
| H | -1.08513200 | 3.45617900 | 14.50731000 |
| H | -2.27723900 | 3.61362600 | 13.22111300 |
| C | -1.78663800 | 5.45401800 | 14.14217500 |
| C | 3.17830600  | 4.11418100 | 10.25188700 |
| C | 4.25458100  | 5.63905900 | 11.77503500 |
| H | 3.15299500  | 6.10472300 | 13.55929800 |
| C | -1.79021100 | 5.74615500 | 15.50815700 |
| C | -2.20210600 | 6.44138800 | 13.24067400 |
| H | 3.19015900  | 3.54632000 | 9.32690700  |
| C | 4.26424700  | 4.91730500 | 10.57964800 |
| H | 5.09535400  | 6.27095200 | 12.03736100 |
| H | -1.46704400 | 4.99110200 | 16.21744100 |
| C | -2.20199500 | 6.99743300 | 15.96909000 |
| C | -2.60994700 | 7.69181400 | 13.69724700 |
| H | -2.20072400 | 6.22668400 | 12.17797500 |
| H | 5.11437900  | 4.97943500 | 9.91022500  |
| H | -2.19749900 | 7.20786200 | 17.03272000 |
| C | -2.61203300 | 7.97385400 | 15.06450000 |
| H | -2.92968800 | 8.44666200 | 12.98740700 |
| H | -2.93018900 | 8.94753000 | 15.41954400 |
| C | -0.07014800 | 2.86421100 | 11.89815300 |
| C | 0.90088400  | 3.13685000 | 10.73598300 |
| H | 1.29551200  | 2.17157200 | 10.40091600 |
| C | 0.10611400  | 3.72497400 | 9.56030900  |
| H | 0.76080200  | 4.05814300 | 8.75966700  |
| H | -0.48907200 | 4.57855000 | 9.89842000  |
| N | -0.77325600 | 2.67861500 | 9.01248100  |
| C | -0.86888200 | 2.57263200 | 7.53712800  |
| H | 0.09532400  | 2.89308000 | 7.14464700  |
| H | -0.98753900 | 1.52657300 | 7.26353200  |
| C | -1.99782900 | 3.43182700 | 6.96925300  |

|   |             |             |             |
|---|-------------|-------------|-------------|
| H | -2.97046900 | 3.10957800  | 7.34647300  |
| H | -1.85798500 | 4.48499000  | 7.22028400  |
| H | -2.00348900 | 3.33834000  | 5.88140000  |
| C | -1.42007700 | 1.89667400  | 9.85060600  |
| C | -1.39999500 | 2.24384400  | 11.32639000 |
| C | -2.22088300 | 0.79246900  | 9.41285800  |
| C | -1.96696100 | 1.17902000  | 12.21365600 |
| H | -2.13225000 | 3.07196100  | 11.34535600 |
| C | -2.78583500 | -0.05183100 | 10.31691300 |
| H | -2.34929700 | 0.60085500  | 8.35893600  |
| C | -2.63092100 | 0.11352600  | 11.73759300 |
| H | -1.84383900 | 1.31724500  | 13.28020400 |
| H | -3.36048300 | -0.89507700 | 9.95159600  |
| H | -3.05258600 | -0.62571200 | 12.40607300 |
| H | 0.38206800  | 2.11314600  | 12.56390400 |
| N | -0.32468600 | 4.12498500  | 12.62398200 |
| C | 0.91160500  | 4.60424000  | 13.25848800 |
| H | 0.70223900  | 5.57364700  | 13.71292300 |
| H | 1.20479400  | 3.92897300  | 14.08512900 |

#### D<sub>1</sub>

**G +ZPE = -1116.507594 a.u**

|   |             |            |             |
|---|-------------|------------|-------------|
| C | 2.21594500  | 4.66784200 | 12.32363000 |
| C | -1.31919900 | 3.90791500 | 13.40918700 |
| C | 2.33585500  | 3.89575600 | 11.16322000 |
| C | 3.27033400  | 5.50545500 | 12.70569100 |
| H | -1.07721500 | 3.38199000 | 14.35010700 |
| H | -2.09974600 | 3.32740700 | 12.91634500 |
| C | -1.87477800 | 5.28054600 | 13.74209200 |
| C | 3.51246200  | 3.97306900 | 10.40712000 |
| C | 4.43411500  | 5.57955300 | 11.94758400 |
| H | 3.17458200  | 6.10405100 | 13.60647300 |
| C | -2.07172800 | 5.67126700 | 15.06912200 |
| C | -2.24022700 | 6.16821900 | 12.72197900 |
| H | 3.60829900  | 3.36636200 | 9.51182500  |
| C | 4.55750000  | 4.80660300 | 10.79156500 |
| H | 5.24112100  | 6.23512400 | 12.25509500 |
| H | -1.78874300 | 4.99662700 | 15.87090500 |
| C | -2.62433600 | 6.91599700 | 15.37560600 |
| C | -2.78890600 | 7.41186200 | 13.02339400 |
| H | -2.08701600 | 5.87808900 | 11.68871100 |
| H | 5.46282500  | 4.85300100 | 10.19681000 |
| H | -2.76814800 | 7.20146100 | 16.41191300 |

|   |             |             |             |
|---|-------------|-------------|-------------|
| C | -2.98421000 | 7.79058100  | 14.35311100 |
| H | -3.06762900 | 8.08672700  | 12.22134100 |
| H | -3.41146200 | 8.75914700  | 14.58750200 |
| C | 0.24011900  | 2.67327200  | 11.89196400 |
| C | 1.19680600  | 2.99912600  | 10.73145100 |
| H | 1.60910400  | 2.05555900  | 10.35715800 |
| C | 0.39243300  | 3.65116200  | 9.59778100  |
| H | 1.05289000  | 3.85219600  | 8.75099000  |
| H | 0.00533900  | 4.61384600  | 9.95513300  |
| N | -0.68100700 | 2.78019500  | 9.12893600  |
| C | -1.21477400 | 3.06784900  | 7.79960100  |
| H | -0.38000700 | 3.43054900  | 7.19506800  |
| H | -1.54213900 | 2.13640300  | 7.33114900  |
| C | -2.34936900 | 4.10051800  | 7.77741600  |
| H | -3.20945900 | 3.75864000  | 8.35793500  |
| H | -2.01671500 | 5.05573100  | 8.19154500  |
| H | -2.68109700 | 4.27435300  | 6.74985800  |
| C | -1.34341500 | 1.95400400  | 10.01874300 |
| C | -0.90678200 | 1.83391800  | 11.36721200 |
| C | -2.44087100 | 1.15807700  | 9.61072100  |
| C | -1.50454000 | 0.88451000  | 12.19805300 |
| C | -3.03343500 | 0.24655100  | 10.47482100 |
| H | -2.82935500 | 1.24359500  | 8.60572700  |
| C | -2.56460300 | 0.08629500  | 11.77784100 |
| H | -1.12704100 | 0.78164200  | 13.21090400 |
| H | -3.86829500 | -0.34753300 | 10.11812900 |
| H | -3.01478200 | -0.63483800 | 12.44930500 |
| H | 0.78055600  | 2.06640000  | 12.63911100 |
| N | -0.16503700 | 3.96559600  | 12.50707100 |
| C | 0.98182900  | 4.56836700  | 13.19008800 |
| H | 0.69737400  | 5.56664300  | 13.53065400 |
| H | 1.23630700  | 3.99059800  | 14.10194000 |

### TS15

**G +ZPE = -1103.213819 a.u**

|   |             |             |             |
|---|-------------|-------------|-------------|
| N | -1.33849200 | -0.14475300 | -1.46157800 |
| C | -0.37389100 | 0.59367800  | -1.99856100 |
| C | -2.73937000 | 0.07290400  | -1.88786900 |
| C | 0.98800800  | 0.46099100  | -1.68059500 |
| H | -0.70509200 | 1.36751000  | -2.68118400 |
| C | -1.01926200 | -1.16041700 | -0.49980200 |
| C | -3.62032800 | 0.81919100  | -0.90075500 |
| H | -2.68816100 | 0.62403400  | -2.82799900 |

|    |             |             |             |
|----|-------------|-------------|-------------|
| H  | -3.16975300 | -0.90201200 | -2.11919100 |
| C  | 1.42159600  | -0.87370800 | -1.12625100 |
| H  | 1.65088600  | 0.91129700  | -2.41161800 |
| C  | 0.32853300  | -1.50711700 | -0.29628000 |
| C  | -2.03189500 | -1.79135900 | 0.22890900  |
| C  | -4.96843700 | 0.46179900  | -0.79877200 |
| C  | -3.14565300 | 1.89641000  | -0.14875100 |
| H  | 1.69760300  | -1.55020200 | -1.94565600 |
| H  | 2.32608100  | -0.74214500 | -0.52600200 |
| C  | 0.62455900  | -2.48264400 | 0.65469700  |
| C  | -1.70923000 | -2.76821200 | 1.16556900  |
| H  | -3.06747400 | -1.51915400 | 0.08860000  |
| C  | -5.82810800 | 1.16950100  | 0.03885800  |
| H  | -5.34887700 | -0.37363500 | -1.37741200 |
| C  | -4.00320800 | 2.60031300  | 0.69456400  |
| H  | -2.10569800 | 2.19414700  | -0.21427100 |
| C  | -0.37908300 | -3.11446100 | 1.38481900  |
| H  | 1.66249000  | -2.75203000 | 0.81691700  |
| H  | -2.50189500 | -3.24908200 | 1.72554900  |
| C  | -5.34663600 | 2.24029700  | 0.78975500  |
| H  | -6.87043500 | 0.88025400  | 0.10727100  |
| H  | -3.62108900 | 3.43240100  | 1.27461800  |
| H  | -0.12351800 | -3.87057700 | 2.11739400  |
| H  | -6.01251900 | 2.78917100  | 1.44543500  |
| O  | 4.37761100  | -0.70467500 | 2.45370100  |
| C  | 1.32366200  | 1.81335400  | -0.23181900 |
| C  | 4.69336600  | -0.95780700 | 3.85109500  |
| Mg | 3.61950300  | 0.96293500  | 1.59000900  |
| H  | 4.71584000  | -1.41831400 | 1.90015100  |
| O  | 2.55116700  | 1.64135600  | 0.15972400  |
| H  | 1.12343000  | 2.71003400  | -0.82202300 |
| H  | 0.52022000  | 1.54690200  | 0.46223700  |
| H  | 4.23863500  | -1.89805900 | 4.15954700  |
| H  | 5.77407600  | -0.98718300 | 3.98438900  |
| H  | 4.26932300  | -0.13578700 | 4.42193000  |

**int-12**

**G +ZPE = -1103.225791 a.u**

|   |             |            |             |
|---|-------------|------------|-------------|
| N | -1.37396900 | 0.03791900 | -1.29304000 |
| C | -0.39341800 | 0.76740800 | -1.73652300 |
| C | -2.75536600 | 0.29175800 | -1.79820400 |
| C | 1.00290900  | 0.59933400 | -1.30646900 |
| H | -0.65855100 | 1.55344500 | -2.43460200 |

|    |             |             |             |
|----|-------------|-------------|-------------|
| C  | -1.13750000 | -1.03754300 | -0.35553400 |
| C  | -3.66494700 | 1.02910800  | -0.83309300 |
| H  | -2.63550700 | 0.86216600  | -2.71945400 |
| H  | -3.17812400 | -0.67508600 | -2.06834300 |
| C  | 1.29727800  | -0.86593000 | -0.98042100 |
| H  | 1.64447700  | 0.94997800  | -2.11715300 |
| C  | 0.18194000  | -1.48310700 | -0.17648400 |
| C  | -2.19969200 | -1.61870200 | 0.33788700  |
| C  | -5.01367000 | 0.66360200  | -0.77615600 |
| C  | -3.21747100 | 2.10546500  | -0.06288300 |
| H  | 1.42999900  | -1.43516500 | -1.90768400 |
| H  | 2.24110600  | -0.92005700 | -0.43569200 |
| C  | 0.40496700  | -2.52623100 | 0.71937500  |
| C  | -1.94873100 | -2.66024400 | 1.22549100  |
| H  | -3.21089000 | -1.26156600 | 0.21313500  |
| C  | -5.90158900 | 1.36352500  | 0.03790900  |
| H  | -5.37228900 | -0.16926400 | -1.37158500 |
| C  | -4.10432600 | 2.79908400  | 0.75790800  |
| H  | -2.17857000 | 2.41234900  | -0.09278000 |
| C  | -0.64725000 | -3.11512300 | 1.41751500  |
| H  | 1.41870700  | -2.88172600 | 0.86482400  |
| H  | -2.77316800 | -3.10787300 | 1.76607700  |
| C  | -5.44795200 | 2.43150100  | 0.80955900  |
| H  | -6.94425000 | 1.07004100  | 0.07161100  |
| H  | -3.74422800 | 3.62927100  | 1.35419800  |
| H  | -0.44996300 | -3.92516500 | 2.10926400  |
| H  | -6.13609200 | 2.97319400  | 1.44787000  |
| O  | 4.66405500  | -0.67971700 | 2.35806600  |
| C  | 1.32565900  | 1.57149900  | -0.08505500 |
| C  | 5.23713200  | -0.88534800 | 3.67782100  |
| Mg | 3.89102500  | 0.98751700  | 1.49990700  |
| H  | 4.76868400  | -1.47640400 | 1.82501600  |
| O  | 2.65989000  | 1.51052400  | 0.20911600  |
| H  | 1.01963900  | 2.58262100  | -0.39346100 |
| H  | 0.67463200  | 1.27595500  | 0.75376300  |
| H  | 4.72217100  | -1.70753600 | 4.17332400  |
| H  | 6.30247900  | -1.09461300 | 3.58740500  |
| H  | 5.08537300  | 0.03559700  | 4.23428700  |

### TS16

**G +ZPE = -1103.21612 a.u**

|   |             |            |             |
|---|-------------|------------|-------------|
| N | -1.38109600 | 0.38851300 | -1.18637800 |
| C | -0.51770800 | 1.30597400 | -1.49269400 |

|    |             |             |             |
|----|-------------|-------------|-------------|
| C  | -2.76516100 | 0.47915700  | -1.74696900 |
| C  | 0.87639100  | 1.31069900  | -0.98485800 |
| H  | -0.86863800 | 2.10505000  | -2.13538100 |
| C  | -1.02272900 | -0.72918400 | -0.34000200 |
| C  | -3.81350500 | 0.96120200  | -0.76171000 |
| H  | -2.69744400 | 1.15635700  | -2.59823900 |
| H  | -3.01560100 | -0.50727900 | -2.13401900 |
| C  | 1.37852100  | -0.12321600 | -0.79282900 |
| H  | 1.48980700  | 1.82652800  | -1.72739000 |
| C  | 0.34055200  | -0.98243500 | -0.12057800 |
| C  | -2.01118300 | -1.53684700 | 0.22444700  |
| C  | -5.07209500 | 0.35173400  | -0.77133400 |
| C  | -3.58379800 | 2.03805000  | 0.09874800  |
| H  | 1.62639700  | -0.55617200 | -1.76854600 |
| H  | 2.29791700  | -0.09860600 | -0.20796400 |
| C  | 0.68556900  | -2.06608800 | 0.68328400  |
| C  | -1.63873300 | -2.61381500 | 1.02168600  |
| H  | -3.05934100 | -1.33031100 | 0.07063600  |
| C  | -6.08547200 | 0.81077500  | 0.06744700  |
| H  | -5.26219800 | -0.48354700 | -1.43689400 |
| C  | -4.59491800 | 2.49021600  | 0.94372500  |
| H  | -2.62013700 | 2.53322900  | 0.12098000  |
| C  | -0.29163800 | -2.87968500 | 1.25207400  |
| H  | 1.73475200  | -2.27340100 | 0.85923900  |
| H  | -2.40547000 | -3.23805600 | 1.46273400  |
| C  | -5.84769400 | 1.87892400  | 0.92994800  |
| H  | -7.05622000 | 0.32950100  | 0.04944500  |
| H  | -4.40311300 | 3.32274100  | 1.61043300  |
| H  | -0.00092200 | -3.71763700 | 1.87398900  |
| H  | -6.63268800 | 2.23265500  | 1.58798300  |
| C  | 0.94655000  | 2.16604800  | 0.32638700  |
| H  | 0.62690100  | 3.18860500  | 0.09785900  |
| H  | 0.26159300  | 1.75242900  | 1.07164400  |
| O  | 2.25267200  | 2.13626700  | 0.84637600  |
| H  | 3.06084700  | 2.84431000  | 0.41778800  |
| Mg | 3.15011100  | 3.09458000  | 2.44478600  |
| O  | 3.97472800  | 3.67957100  | 0.75739600  |
| C  | 5.25978800  | 3.69635600  | 0.16693400  |
| H  | 5.66712900  | 2.68433900  | 0.04237400  |
| H  | 5.22224000  | 4.17090300  | -0.82087300 |
| H  | 5.95896400  | 4.26837100  | 0.78619200  |

**int-13**

**G +ZPE = -1103.21302 a.u**

|    |             |             |             |
|----|-------------|-------------|-------------|
| N  | -0.55290900 | 0.39814700  | -0.57991900 |
| C  | 0.58100000  | 1.02765200  | -0.54800100 |
| C  | -1.71441100 | 1.02400900  | -1.28356400 |
| C  | 1.78568900  | 0.47701100  | 0.09700400  |
| H  | 0.61475300  | 1.98284200  | -1.06043800 |
| C  | -0.69539600 | -0.90652900 | 0.02813500  |
| C  | -2.85332300 | 1.38477600  | -0.35332300 |
| H  | -1.31910900 | 1.91005300  | -1.77945100 |
| H  | -2.03944500 | 0.33849700  | -2.06446600 |
| C  | 1.40838700  | -0.38557200 | 1.30692400  |
| H  | 2.27503600  | -0.16492300 | -0.68453000 |
| C  | 0.27927500  | -1.31814100 | 0.95013900  |
| C  | -1.76623100 | -1.73358700 | -0.31086800 |
| C  | -4.15990600 | 1.02183900  | -0.68925200 |
| C  | -2.62825400 | 2.13577500  | 0.80492900  |
| H  | 2.27728000  | -0.95143400 | 1.64088700  |
| H  | 1.10142800  | 0.25892900  | 2.14105800  |
| C  | 0.14753700  | -2.57712800 | 1.52967700  |
| C  | -1.87337600 | -2.98873600 | 0.27948600  |
| H  | -2.51250800 | -1.42448400 | -1.02652900 |
| C  | -5.22834800 | 1.40169300  | 0.12137500  |
| H  | -4.34741300 | 0.44612500  | -1.58931400 |
| C  | -3.69482800 | 2.50723100  | 1.61905400  |
| H  | -1.62221800 | 2.43599900  | 1.07737000  |
| C  | -0.91978900 | -3.41048000 | 1.20149700  |
| H  | 0.89360300  | -2.90634500 | 2.24369600  |
| H  | -2.70305000 | -3.63145700 | 0.01367200  |
| C  | -4.99717400 | 2.14134600  | 1.27891300  |
| H  | -6.23747800 | 1.11523700  | -0.15055700 |
| H  | -3.50942800 | 3.08642600  | 2.51602700  |
| H  | -1.00266700 | -4.38750800 | 1.66183200  |
| H  | -5.82635300 | 2.43265200  | 1.91302500  |
| C  | 2.80577400  | 1.57307200  | 0.41219100  |
| H  | 2.93937300  | 2.24388600  | -0.43851400 |
| H  | 2.51172800  | 2.15695700  | 1.28491300  |
| O  | 4.08117700  | 0.93693500  | 0.70268400  |
| H  | 4.50920700  | 1.37313700  | 1.44784400  |
| Mg | 5.17217400  | -0.18908300 | -0.65161300 |
| O  | 3.75273900  | -0.85992300 | -1.66683400 |
| C  | 3.56636500  | -1.78462700 | -2.70105900 |
| H  | 4.10742900  | -1.50793800 | -3.61997400 |
| H  | 3.89338800  | -2.80103200 | -2.42902600 |
| H  | 2.50146600  | -1.85599500 | -2.97128400 |

**TS17****G +ZPE = -1103.221511 a.u**

|    |             |             |             |
|----|-------------|-------------|-------------|
| N  | -1.34943800 | 1.39629600  | -1.60855200 |
| C  | -0.20328000 | 2.04671100  | -1.55880100 |
| C  | -2.49005200 | 1.99274700  | -2.34452100 |
| C  | 0.96872400  | 1.56838400  | -0.91382600 |
| H  | -0.17758600 | 2.98454600  | -2.10311600 |
| C  | -1.47137000 | 0.09099700  | -1.01456300 |
| C  | -3.64421400 | 2.39724700  | -1.44649000 |
| H  | -2.09268500 | 2.86375300  | -2.86648300 |
| H  | -2.81827000 | 1.29065000  | -3.11095000 |
| C  | 0.70872800  | 0.54235300  | 0.18973900  |
| H  | 1.60437000  | 0.95927900  | -1.85487800 |
| C  | -0.44842100 | -0.36189400 | -0.16606400 |
| C  | -2.56969700 | -0.72141800 | -1.30365800 |
| C  | -4.95700800 | 2.15348200  | -1.85787700 |
| C  | -3.42270100 | 3.06860300  | -0.24015400 |
| H  | 1.60337100  | -0.05579600 | 0.36831200  |
| H  | 0.48608900  | 1.06193300  | 1.13266200  |
| C  | -0.55424900 | -1.64193900 | 0.37373100  |
| C  | -2.65453400 | -1.99473400 | -0.74756000 |
| H  | -3.36217100 | -0.38061200 | -1.95282500 |
| C  | -6.03290300 | 2.57523300  | -1.07801500 |
| H  | -5.14200300 | 1.63336000  | -2.79187400 |
| C  | -4.49703000 | 3.48379800  | 0.54280800  |
| H  | -2.41129800 | 3.26774900  | 0.09601500  |
| C  | -1.64638700 | -2.45931000 | 0.09095000  |
| H  | 0.23376500  | -1.99887800 | 1.02759600  |
| H  | -3.51023600 | -2.61778600 | -0.97664400 |
| C  | -5.80512100 | 3.23932500  | 0.12542400  |
| H  | -7.04620100 | 2.37896200  | -1.40877700 |
| H  | -4.31213600 | 4.00011100  | 1.47774000  |
| H  | -1.70729600 | -3.45108500 | 0.52252900  |
| H  | -6.64027400 | 3.56278800  | 0.73581300  |
| C  | 1.94821800  | 2.66994800  | -0.54745300 |
| H  | 1.95106300  | 3.46810400  | -1.29214300 |
| H  | 1.72556400  | 3.09317600  | 0.43428900  |
| O  | 3.29905200  | 2.11011200  | -0.46664800 |
| H  | 3.81867000  | 2.61912100  | 0.16609800  |
| Mg | 4.23162100  | 0.85716600  | -1.79037200 |
| O  | 2.56963300  | 0.38585400  | -2.62013400 |
| C  | 2.11605800  | -0.65527600 | -3.46893000 |

|   |            |             |             |
|---|------------|-------------|-------------|
| H | 2.62323300 | -0.61326100 | -4.43877400 |
| H | 2.28837600 | -1.64493000 | -3.03011100 |
| H | 1.04031200 | -0.54789700 | -3.65133700 |

**int-14**

**G +ZPE = -1103.234934 a.u**

|   |             |             |             |
|---|-------------|-------------|-------------|
| N | -1.40265500 | 1.18159300  | -1.23499900 |
| C | -0.20779600 | 1.85444700  | -1.11041700 |
| C | -2.40754600 | 1.68063800  | -2.17476700 |
| C | 0.79582500  | 1.49269500  | -0.28034800 |
| H | -0.12113300 | 2.74027800  | -1.72917000 |
| C | -1.55910300 | -0.07053800 | -0.59767500 |
| C | -3.68844900 | 2.19192600  | -1.53181800 |
| H | -1.93989100 | 2.49405400  | -2.73342100 |
| H | -2.64574600 | 0.90610400  | -2.90978400 |
| C | 0.62356200  | 0.33345400  | 0.66830500  |
| H | 1.46280100  | 0.67779500  | -2.33563000 |
| C | -0.56694500 | -0.52937500 | 0.29408400  |
| C | -2.67649400 | -0.87779000 | -0.85876800 |
| C | -4.89328600 | 2.10261000  | -2.23540800 |
| C | -3.68392900 | 2.79992400  | -0.27383100 |
| H | 1.52971900  | -0.28100400 | 0.69515800  |
| H | 0.49952700  | 0.71697400  | 1.69348100  |
| C | -0.71377800 | -1.79071000 | 0.86998400  |
| C | -2.80337700 | -2.12770800 | -0.26013400 |
| H | -3.45706900 | -0.53484900 | -1.52245700 |
| C | -6.07117200 | 2.61737600  | -1.69655100 |
| H | -4.91177000 | 1.62492900  | -3.21001700 |
| C | -4.86176900 | 3.31106400  | 0.26882800  |
| H | -2.75918600 | 2.86853900  | 0.28758100  |
| C | -1.81878400 | -2.59611400 | 0.60444100  |
| H | 0.05622000  | -2.14168200 | 1.54967000  |
| H | -3.67690000 | -2.73177500 | -0.47648900 |
| C | -6.05857700 | 3.22346900  | -0.44116000 |
| H | -6.99789100 | 2.53822300  | -2.25366200 |
| H | -4.84413700 | 3.77746400  | 1.24749000  |
| H | -1.90988900 | -3.57025300 | 1.06987000  |
| H | -6.97438300 | 3.61955500  | -0.01752600 |
| C | 1.99573900  | 2.35962600  | -0.13892000 |
| H | 1.96523900  | 3.21938100  | -0.80691300 |
| H | 2.12516800  | 2.71295300  | 0.88647800  |
| O | 3.24752700  | 1.61822600  | -0.45783100 |
| H | 3.77232100  | 1.49431200  | 0.34097100  |

|    |            |             |             |
|----|------------|-------------|-------------|
| Mg | 4.01158600 | 1.09757200  | -2.26232200 |
| O  | 2.20331400 | 0.56061700  | -2.95966800 |
| C  | 1.73885000 | 0.14076500  | -4.26764100 |
| H  | 1.08858000 | 0.90539700  | -4.69199300 |
| H  | 2.61928200 | 0.01449400  | -4.89285600 |
| H  | 1.20955800 | -0.80746700 | -4.17945600 |

**int-15**

**G +ZPE = -711.662522 a.u**

|   |             |             |             |
|---|-------------|-------------|-------------|
| N | -1.62998900 | 0.59352100  | -1.53496300 |
| C | -0.50704900 | 1.23706600  | -1.70994800 |
| C | -2.78874100 | 0.94814200  | -2.40081800 |
| C | 0.68404700  | 1.00066700  | -0.94853300 |
| H | -0.50190400 | 2.00469600  | -2.47371100 |
| C | -1.77353100 | -0.40963600 | -0.51015600 |
| C | -3.85001800 | 1.78332800  | -1.70762500 |
| H | -2.37352600 | 1.48620700  | -3.25304700 |
| H | -3.20770100 | 0.01904900  | -2.78489100 |
| C | 0.71806700  | -0.19506000 | -0.03002400 |
| C | -0.65053500 | -0.77206700 | 0.24868200  |
| C | -3.01862900 | -1.00037500 | -0.27707000 |
| C | -5.19023300 | 1.58832200  | -2.05503200 |
| C | -3.52134200 | 2.78448800  | -0.79006100 |
| H | 1.33332500  | -0.97380200 | -0.49622300 |
| H | 1.21306200  | 0.06302100  | 0.90832100  |
| C | -0.81277600 | -1.72683700 | 1.25012100  |
| C | -3.15201400 | -1.95598000 | 0.72306700  |
| H | -3.88787700 | -0.71801300 | -0.85055900 |
| C | -6.18705100 | 2.38506300  | -1.49608900 |
| H | -5.45713200 | 0.81336100  | -2.76576100 |
| C | -4.52013400 | 3.57482200  | -0.22506400 |
| H | -2.48970100 | 2.95500600  | -0.50428000 |
| C | -2.04945100 | -2.31852700 | 1.49152900  |
| H | 0.04834800  | -2.01296300 | 1.84327500  |
| H | -4.11954200 | -2.40837800 | 0.90003300  |
| C | -5.85433600 | 3.37880800  | -0.57740900 |
| H | -7.22196500 | 2.22395200  | -1.77445600 |
| H | -4.25339400 | 4.34464300  | 0.48954500  |
| H | -2.14975600 | -3.05937500 | 2.27531600  |
| H | -6.62947500 | 3.99490200  | -0.13693500 |
| C | 1.70582700  | 1.86041900  | -1.12259800 |
| H | 1.64119700  | 2.67667700  | -1.83180800 |
| H | 2.62512700  | 1.76621100  | -0.55708300 |

**TS18****G +ZPE = -1655.601004 a.u**

|   |             |             |             |
|---|-------------|-------------|-------------|
| N | -1.64301700 | -0.60719300 | -1.26125800 |
| C | -0.61420000 | -0.01489600 | -1.84598500 |
| C | -3.01021100 | -0.25048600 | -1.70184800 |
| C | 0.73244100  | -0.26040000 | -1.52583000 |
| H | -0.85576900 | 0.72419100  | -2.59853400 |
| C | -1.44498700 | -1.56146200 | -0.20905400 |
| C | -3.76943900 | 0.65321900  | -0.74529500 |
| H | -2.90071800 | 0.23729300  | -2.67110400 |
| H | -3.55997400 | -1.17532900 | -1.87870100 |
| C | 1.06659500  | -1.41113000 | -0.61332800 |
| C | -0.13693400 | -1.93804500 | 0.13662300  |
| C | -2.54230400 | -2.10210300 | 0.46901800  |
| C | -5.15790200 | 0.51943600  | -0.64915600 |
| C | -3.13017300 | 1.65492000  | -0.01045400 |
| H | 1.48788500  | -2.22394500 | -1.22129700 |
| H | 1.84984800  | -1.12639000 | 0.09388300  |
| C | 0.03562700  | -2.85214600 | 1.17465400  |
| C | -2.34300900 | -3.01933400 | 1.49482700  |
| H | -3.55019400 | -1.80745900 | 0.21857100  |
| C | -5.89651500 | 1.37616400  | 0.16435300  |
| H | -5.66490900 | -0.25726100 | -1.21219400 |
| C | -3.86824600 | 2.50675200  | 0.80923800  |
| H | -2.05443800 | 1.77475300  | -0.06725700 |
| C | -1.05178900 | -3.39531000 | 1.85318700  |
| H | 1.04340000  | -3.14561400 | 1.44752500  |
| H | -3.20023400 | -3.43087400 | 2.01318000  |
| C | -5.25273500 | 2.37148100  | 0.89759700  |
| H | -6.97227000 | 1.26075100  | 0.22936800  |
| H | -3.35968000 | 3.27665500  | 1.37796300  |
| H | -0.89051300 | -4.10600500 | 2.65469700  |
| H | -5.82512300 | 3.03471900  | 1.53566000  |
| C | 1.68932300  | 0.49743700  | -2.15140300 |
| H | 1.40692300  | 1.33477100  | -2.77629600 |
| H | 2.72052200  | 0.46412000  | -1.82292500 |
| H | 2.24037000  | -0.38189200 | -3.58860900 |
| C | 2.40579300  | 0.01870600  | -6.74666900 |
| C | 2.56767500  | -1.26735900 | -7.37929700 |
| C | 3.59799400  | -2.07414700 | -6.90541800 |
| C | 4.46025000  | -1.61424100 | -5.85487600 |
| C | 4.45690200  | -0.27353500 | -5.39283200 |

|    |            |             |             |
|----|------------|-------------|-------------|
| C  | 3.38429400 | 0.54236100  | -5.85320300 |
| H  | 1.56287500 | 0.64047000  | -7.02125500 |
| H  | 3.69886800 | -3.09180900 | -7.26074500 |
| H  | 5.17869200 | -2.31228100 | -5.44574500 |
| H  | 3.26288400 | 1.54529200  | -5.46446000 |
| C  | 5.50718000 | 0.28490700  | -4.45147600 |
| H  | 5.03797300 | 1.11657300  | -3.91608500 |
| C  | 6.00967200 | -0.72023000 | -3.40730700 |
| H  | 6.67716700 | -0.21584100 | -2.70481100 |
| H  | 5.18220500 | -1.15268100 | -2.83983000 |
| H  | 6.57662900 | -1.53559400 | -3.86504800 |
| C  | 6.67363700 | 0.85769300  | -5.28166500 |
| H  | 6.32651200 | 1.60983500  | -5.99430600 |
| H  | 7.40800200 | 1.32766000  | -4.62266900 |
| H  | 7.17782700 | 0.06515200  | -5.84227800 |
| C  | 1.60170300 | -1.71965900 | -8.43261400 |
| H  | 0.57283200 | -1.50194000 | -8.13833800 |
| H  | 1.79717800 | -1.18210900 | -9.36609200 |
| H  | 1.69413000 | -2.78842900 | -8.62617800 |
| Ru | 2.45949800 | -1.20954300 | -4.98271800 |
| Cl | 0.15114200 | -1.88286400 | -4.65071700 |

**int-16**

**G +ZPE = -712.42951 a.u**

|   |             |             |             |
|---|-------------|-------------|-------------|
| N | -1.69003700 | 0.74896400  | -1.50956900 |
| C | -0.44133600 | 1.38082400  | -1.56972700 |
| C | -2.77370200 | 1.25227000  | -2.34132300 |
| H | -0.41533200 | 2.24149400  | -2.22721000 |
| C | -1.84390500 | -0.40152600 | -0.72990600 |
| C | -3.86733500 | 2.01791200  | -1.60587800 |
| H | -2.32303300 | 1.91269300  | -3.08634100 |
| H | -3.22273000 | 0.42918000  | -2.90659900 |
| C | 0.59755800  | -0.19802900 | 0.02447900  |
| C | -0.74975900 | -0.89885900 | 0.01616100  |
| C | -3.07299700 | -1.08529100 | -0.67416800 |
| C | -5.14367500 | 2.10649000  | -2.17130900 |
| C | -3.61760400 | 2.67792000  | -0.40037100 |
| H | 1.38864900  | -0.91125000 | -0.25157500 |
| H | 0.84953000  | 0.11371200  | 1.05038400  |
| C | -0.92220500 | -2.06158100 | 0.76655400  |
| C | -3.21375300 | -2.24188500 | 0.08575400  |
| H | -3.92946700 | -0.70911700 | -1.21605500 |
| C | -6.14826800 | 2.84595100  | -1.55009800 |

|   |             |             |             |
|---|-------------|-------------|-------------|
| H | -5.35375900 | 1.59088200  | -3.10349300 |
| C | -4.62229600 | 3.41565600  | 0.22512300  |
| H | -2.63569800 | 2.60989500  | 0.05351900  |
| C | -2.13696100 | -2.74296500 | 0.81222600  |
| H | -0.07545700 | -2.43910000 | 1.33232400  |
| H | -4.17348100 | -2.74622700 | 0.10835400  |
| C | -5.89004500 | 3.50404100  | -0.34785600 |
| H | -7.13289000 | 2.90272400  | -2.00084400 |
| H | -4.41387700 | 3.92061000  | 1.16193600  |
| H | -2.23962500 | -3.64330200 | 1.40652000  |
| H | -6.67115600 | 4.07619100  | 0.13978700  |
| C | 1.95547100  | 1.72175500  | -1.00866700 |
| H | 2.28653200  | 2.09604800  | -0.03131900 |
| H | 2.74909900  | 1.05518500  | -1.36980900 |
| H | 1.89091500  | 2.57184000  | -1.69168300 |
| C | 0.64712600  | 0.99445500  | -0.89505600 |

### TS19

**G +ZPE = -1116.900602 a.u**

|   |             |             |             |
|---|-------------|-------------|-------------|
| N | -1.78125100 | 0.16510000  | 1.38393800  |
| C | -1.46105400 | 1.43936400  | 0.82621000  |
| C | -3.17733100 | -0.30760100 | 1.42389300  |
| C | -0.15545900 | 1.94275500  | 0.97202500  |
| C | -2.42694900 | 2.17934600  | 0.13475400  |
| H | -3.79366100 | 0.49313700  | 1.83706300  |
| H | -3.20439600 | -1.12360000 | 2.14797600  |
| C | -3.76409300 | -0.78268400 | 0.10339200  |
| C | 0.14884900  | 3.17775500  | 0.40098500  |
| C | -2.09975300 | 3.41492800  | -0.41509100 |
| H | -3.42851400 | 1.79580000  | 0.00701700  |
| C | -5.13338000 | -0.60816800 | -0.12269900 |
| C | -3.00090300 | -1.44515300 | -0.85994200 |
| H | 1.15623600  | 3.56538500  | 0.50861700  |
| C | -0.80816300 | 3.91758600  | -0.28915000 |
| H | -2.85815800 | 3.97551700  | -0.94825300 |
| H | -5.73827700 | -0.09116400 | 0.61523400  |
| C | -5.72859700 | -1.09058800 | -1.28647100 |
| C | -3.59287100 | -1.92249100 | -2.02801800 |
| H | -1.93801700 | -1.58827900 | -0.70916000 |
| H | -0.54655600 | 4.87523000  | -0.72292300 |
| H | -6.79091600 | -0.94615000 | -1.44656700 |
| C | -4.95874900 | -1.74873300 | -2.24422600 |
| H | -2.98533000 | -2.43094700 | -2.76791000 |

|   |             |             |             |
|---|-------------|-------------|-------------|
| H | -5.41852400 | -2.11982300 | -3.15284900 |
| C | 0.52821300  | -0.26242500 | 1.98520800  |
| C | 0.88531300  | 1.19513000  | 1.77700800  |
| H | 1.86582800  | 1.29327800  | 1.30367400  |
| H | 0.98993400  | 1.66940700  | 2.76475400  |
| C | 0.98465400  | -1.19837200 | 0.02714400  |
| H | 0.58455000  | -0.34368900 | -0.49936900 |
| H | 0.34713400  | -2.06231100 | 0.14305300  |
| N | 2.29172200  | -1.44174900 | -0.10408600 |
| C | 2.80703200  | -2.82908700 | 0.06943000  |
| H | 2.02223100  | -3.38755100 | 0.57921400  |
| H | 2.91924300  | -3.25323600 | -0.93382200 |
| C | 4.12062000  | -2.95726700 | 0.83004900  |
| H | 4.94093300  | -2.45249900 | 0.31845100  |
| H | 4.04490500  | -2.56691800 | 1.84643100  |
| H | 4.37305000  | -4.01828600 | 0.89434100  |
| C | 3.14053700  | -0.47144100 | -0.76101300 |
| C | 4.15049300  | 0.19091200  | -0.06217800 |
| C | 2.94233400  | -0.21982100 | -2.12036500 |
| C | 4.95691100  | 1.11229600  | -0.72747300 |
| H | 4.29861200  | -0.00078600 | 0.99259100  |
| C | 3.74984100  | 0.70577200  | -2.77714300 |
| H | 2.16398600  | -0.74935300 | -2.65722200 |
| C | 4.75804900  | 1.37177600  | -2.08261800 |
| H | 5.73665200  | 1.63051300  | -0.18226900 |
| H | 3.59160900  | 0.90141100  | -3.83100600 |
| H | 5.38637300  | 2.09062400  | -2.59498200 |
| C | -0.81647900 | -0.59241600 | 1.93836400  |
| H | -1.15113500 | -1.55139900 | 2.31751700  |
| C | 1.42678900  | -1.04022000 | 2.91148400  |
| H | 1.08421300  | -2.06786600 | 3.05115800  |
| H | 2.44877800  | -1.06955600 | 2.52506500  |
| H | 1.47080700  | -0.55726000 | 3.89386100  |

**int-17**

**G +ZPE = -1116.918547 a.u**

|   |             |             |             |
|---|-------------|-------------|-------------|
| N | -0.19856200 | 1.56276200  | 11.89307600 |
| C | 0.53645800  | 2.00548600  | 13.05638300 |
| C | -1.15146900 | 0.41551900  | 12.01242400 |
| C | 1.21366800  | 3.23166700  | 12.98129900 |
| C | 0.58818900  | 1.21579300  | 14.20628800 |
| H | -0.56840800 | -0.46075200 | 12.29650300 |
| H | -1.52876800 | 0.23783700  | 11.00581900 |

|   |             |             |             |
|---|-------------|-------------|-------------|
| C | -2.29234600 | 0.64620600  | 12.98075000 |
| C | 1.93408500  | 3.65271900  | 14.09729400 |
| C | 1.31647800  | 1.65795800  | 15.30496500 |
| H | 0.07838500  | 0.26610400  | 14.25999100 |
| C | -2.72363700 | -0.41660600 | 13.77968400 |
| C | -2.96726700 | 1.86765600  | 13.04613800 |
| H | 2.46509500  | 4.59650900  | 14.05198600 |
| C | 1.98495300  | 2.87871700  | 15.25383400 |
| H | 1.35895100  | 1.04460900  | 16.19611200 |
| H | -2.20679300 | -1.36944900 | 13.73717100 |
| C | -3.81639800 | -0.26187800 | 14.63031100 |
| C | -4.05239100 | 2.02509400  | 13.90530700 |
| H | -2.65296800 | 2.69996000  | 12.42829300 |
| H | 2.55166900  | 3.22452700  | 16.10988200 |
| H | -4.14167700 | -1.09414400 | 15.24347300 |
| C | -4.48113000 | 0.96095200  | 14.69757400 |
| H | -4.56469000 | 2.97900000  | 13.95204800 |
| H | -5.32676000 | 1.08494100  | 15.36395800 |
| C | 1.02247500  | 3.15943200  | 10.47501300 |
| C | 1.13667900  | 4.04988700  | 11.72164500 |
| H | 0.26475600  | 4.71242000  | 11.75295600 |
| H | 2.01740800  | 4.68941700  | 11.63256000 |
| C | 0.68521000  | 3.99545900  | 9.20720800  |
| H | 0.61286500  | 3.30755200  | 8.35279200  |
| H | 1.56035700  | 4.62036400  | 9.02237300  |
| N | -0.46941600 | 4.88050800  | 9.33908300  |
| C | -0.31863400 | 6.13816200  | 8.56779600  |
| H | 0.69304500  | 6.50317100  | 8.75887400  |
| H | -0.39311100 | 5.94731400  | 7.48500600  |
| C | -1.31621600 | 7.22106400  | 8.96522600  |
| H | -2.34558100 | 6.93067500  | 8.74635100  |
| H | -1.24197400 | 7.44655000  | 10.03210900 |
| H | -1.10092800 | 8.13442900  | 8.40451700  |
| C | -1.75047800 | 4.24366100  | 9.14680200  |
| C | -2.75448600 | 4.44184200  | 10.10011400 |
| C | -2.03776400 | 3.46824100  | 8.01410600  |
| C | -4.01848400 | 3.87741300  | 9.92917500  |
| H | -2.53404600 | 5.04823800  | 10.97060800 |
| C | -3.29692600 | 2.89482100  | 7.85050700  |
| H | -1.28215400 | 3.31745000  | 7.25157900  |
| C | -4.29176400 | 3.09816900  | 8.80696100  |
| H | -4.78629900 | 4.04316100  | 10.67608900 |
| H | -3.50372200 | 2.29675900  | 6.97014400  |
| H | -5.27184700 | 2.65428000  | 8.67628800  |

|   |             |            |             |
|---|-------------|------------|-------------|
| C | 0.00754400  | 2.09343700 | 10.72693000 |
| H | -0.54991800 | 1.66994500 | 9.89912000  |
| C | 2.35302900  | 2.40230500 | 10.18152200 |
| H | 2.25846300  | 1.76199200 | 9.30239700  |
| H | 3.13380300  | 3.14142400 | 9.98845600  |
| H | 2.66339100  | 1.78755100 | 11.02719500 |

**TS20**

**G +ZPE = -1116.892376 a.u**

|   |             |             |             |
|---|-------------|-------------|-------------|
| N | -0.81458000 | -0.69271700 | -0.85890400 |
| C | 0.42877100  | -0.19082600 | -1.18591200 |
| C | -2.02194500 | -0.02188000 | -1.37442700 |
| C | 1.62773700  | -1.14851400 | -1.22179200 |
| H | 0.38183000  | 0.49443600  | -2.02320000 |
| C | -0.96025400 | -1.96399900 | -0.21994400 |
| C | -2.82699600 | 0.87585000  | -0.43999100 |
| H | -1.71709200 | 0.56568500  | -2.24286600 |
| H | -2.68109300 | -0.80912600 | -1.75227900 |
| C | 1.10562500  | -2.58410600 | -1.44194100 |
| C | 2.43433300  | -1.13954500 | 0.12194400  |
| C | 0.31424600  | 2.40696600  | -0.05306600 |
| C | 2.49212700  | 1.24769500  | 0.13837600  |
| C | 0.01853900  | -2.93909300 | -0.46983200 |
| C | -2.07220500 | -2.28226300 | 0.56440000  |
| C | -3.85364400 | 1.63466700  | -1.01718600 |
| C | -2.62125400 | 0.97088600  | 0.93765100  |
| H | 0.70482400  | -2.65068000 | -2.46064200 |
| H | 1.93543300  | -3.29142800 | -1.38337000 |
| N | 3.17915700  | 0.10116300  | 0.28246700  |
| H | 3.14626600  | -1.96180700 | 0.11263500  |
| H | 1.76016600  | -1.30469600 | 0.96656400  |
| C | 0.94958600  | 3.57682800  | -0.34403600 |
| H | -0.76371500 | 2.38262600  | 0.02245200  |
| C | 3.12625700  | 2.50032200  | -0.09005300 |
| C | -0.09590500 | -4.19234300 | 0.12324800  |
| C | -2.18339400 | -3.55102900 | 1.13256400  |
| H | -2.85327500 | -1.55641900 | 0.73802000  |
| C | -4.65478800 | 2.46244400  | -0.23696400 |
| H | -4.02558900 | 1.57719400  | -2.08740200 |
| C | -3.42270900 | 1.80265400  | 1.72231700  |
| H | -1.83167500 | 0.40228400  | 1.41314800  |
| C | 4.65140100  | 0.05802700  | 0.37727600  |
| C | 2.36939900  | 3.61592300  | -0.34412800 |

|   |             |             |             |
|---|-------------|-------------|-------------|
| H | 0.38621100  | 4.48180900  | -0.53229500 |
| H | 4.20310600  | 2.57957400  | -0.08076900 |
| C | -1.19085500 | -4.50411300 | 0.92977000  |
| H | 0.66809500  | -4.93787400 | -0.06877600 |
| H | -3.04945100 | -3.78371200 | 1.74077900  |
| C | -4.44232100 | 2.54907800  | 1.13955900  |
| H | -5.44298900 | 3.04220500  | -0.70363300 |
| H | -3.24415600 | 1.86315900  | 2.78976000  |
| C | 5.16244900  | 0.39582300  | 1.77850100  |
| H | 5.08167700  | 0.72842700  | -0.36951500 |
| H | 4.95774800  | -0.95015500 | 0.10319500  |
| H | 2.87301400  | 4.55465300  | -0.54519400 |
| H | -1.27151900 | -5.48521600 | 1.38228000  |
| H | -5.06474300 | 3.19396900  | 1.74888300  |
| H | 6.25303600  | 0.33226600  | 1.79287500  |
| H | 4.87697500  | 1.40627300  | 2.07798500  |
| H | 4.76710200  | -0.30661800 | 2.51522800  |
| C | 1.03828800  | 1.17738100  | 0.15514600  |
| H | 0.64139300  | 0.52807700  | 0.93002600  |
| C | 2.54243100  | -0.75656900 | -2.39567000 |
| H | 3.42750200  | -1.39708600 | -2.41716700 |
| H | 2.01167700  | -0.88441800 | -3.34155800 |
| H | 2.87468800  | 0.28118000  | -2.33922600 |

**int-18**

**G +ZPE = -1116.901008 a.u**

|   |             |            |             |
|---|-------------|------------|-------------|
| N | 2.03856600  | 4.77884100 | 11.60617400 |
| C | 2.48892500  | 3.89280100 | 12.69511900 |
| C | 0.59056700  | 5.00859200 | 11.56145400 |
| C | 4.01887400  | 3.74353900 | 12.75915700 |
| H | 2.15279600  | 4.30548000 | 13.65477600 |
| C | 2.87832600  | 5.76034300 | 11.05228900 |
| C | -0.18080900 | 4.26461300 | 10.47672800 |
| H | 0.16520100  | 4.74993200 | 12.53624600 |
| H | 0.41040500  | 6.08209500 | 11.45089500 |
| C | 4.66763900  | 5.13702100 | 12.70150300 |
| C | 4.47785000  | 2.92637200 | 11.54315100 |
| C | 0.87039000  | 2.10264700 | 13.63321500 |
| C | 2.70901800  | 1.34313400 | 12.08069300 |
| C | 4.19245000  | 5.94736400 | 11.52630100 |
| C | 2.43322400  | 6.56033200 | 9.98148300  |
| C | -1.57575700 | 4.18169600 | 10.57467200 |
| C | 0.45069800  | 3.68588500 | 9.37303800  |

|   |             |             |             |
|---|-------------|-------------|-------------|
| H | 4.42464900  | 5.65676000  | 13.63601500 |
| H | 5.75656100  | 5.03685300  | 12.68120500 |
| N | 3.86732500  | 1.58141900  | 11.50635600 |
| H | 5.55713900  | 2.77905400  | 11.58307700 |
| H | 4.24737200  | 3.44467700  | 10.60911800 |
| C | 0.52671400  | 0.82254000  | 13.85780600 |
| H | 0.39651000  | 2.91221800  | 14.17526200 |
| C | 2.18047100  | 0.01528000  | 12.22715400 |
| C | 5.01721100  | 6.89585300  | 10.92204100 |
| C | 3.26599800  | 7.51659500  | 9.40946200  |
| H | 1.43985100  | 6.42396900  | 9.57541800  |
| C | -2.32080800 | 3.53902200  | 9.59047800  |
| H | -2.08031800 | 4.62152300  | 11.42938900 |
| C | -0.29545700 | 3.03840900  | 8.38607000  |
| H | 1.52921900  | 3.74126200  | 9.28528500  |
| C | 4.64085900  | 0.53125800  | 10.79436100 |
| C | 1.15145300  | -0.21905900 | 13.08738300 |
| H | -0.21636300 | 0.56236100  | 14.60024800 |
| H | 2.65173500  | -0.81744300 | 11.72868900 |
| C | 4.56841700  | 7.69184900  | 9.87137800  |
| H | 6.02828200  | 7.01651000  | 11.29839900 |
| H | 2.89190400  | 8.11621200  | 8.58705400  |
| C | -1.68170100 | 2.96391800  | 8.49049800  |
| H | -3.39953200 | 3.48165900  | 9.68316500  |
| H | 0.21065200  | 2.59478400  | 7.53600700  |
| C | 4.14651300  | 0.31149700  | 9.36544600  |
| H | 4.60567100  | -0.38772000 | 11.37782200 |
| H | 5.67707200  | 0.86366800  | 10.79243400 |
| H | 0.81534000  | -1.24029900 | 13.22529600 |
| H | 5.22261900  | 8.42846300  | 9.42061900  |
| H | -2.26114200 | 2.46081400  | 7.72493200  |
| H | 4.76767200  | -0.44891600 | 8.88779400  |
| H | 3.11069400  | -0.03287600 | 9.34631800  |
| H | 4.21845700  | 1.22902900  | 8.77850000  |
| C | 1.82862500  | 2.47890700  | 12.54548300 |
| H | 1.16640700  | 2.55280700  | 11.65826600 |
| C | 4.43080000  | 3.06183600  | 14.07733600 |
| H | 5.51745700  | 2.95401600  | 14.11617300 |
| H | 4.12270800  | 3.67457400  | 14.92727600 |
| H | 3.99705600  | 2.06921400  | 14.21192400 |

Cr'

G +ZPE = -1116.510123 a.u

|   |             |             |             |
|---|-------------|-------------|-------------|
| N | 2.05037300  | 4.56350500  | 11.73931900 |
| C | 2.65474700  | 3.82904400  | 12.88345600 |
| C | 0.58892800  | 4.61498300  | 11.69962400 |
| C | 4.18001500  | 3.66263200  | 12.69350800 |
| C | 2.06166400  | 2.44749500  | 13.05599900 |
| H | 2.48350800  | 4.39810600  | 13.80914700 |
| C | 2.74568400  | 5.62883100  | 11.15321600 |
| C | -0.06358600 | 4.06626900  | 10.43694300 |
| H | 0.21345900  | 4.03620200  | 12.54335700 |
| H | 0.24443300  | 5.64419400  | 11.86098500 |
| C | 4.81570700  | 5.04582400  | 12.49768800 |
| C | 4.42993400  | 2.80275900  | 11.44129400 |
| C | 1.11047700  | 2.18821200  | 14.03892700 |
| C | 2.55862300  | 1.38593400  | 12.25401600 |
| C | 4.10168200  | 5.88464200  | 11.46730600 |
| C | 2.11991200  | 6.46716400  | 10.20437100 |
| C | -1.34910900 | 4.49649700  | 10.08851500 |
| C | 0.56254900  | 3.10564800  | 9.63937000  |
| H | 4.81087800  | 5.56322700  | 13.46518500 |
| H | 5.86946600  | 4.93320800  | 12.22112400 |
| N | 3.53201300  | 1.64524500  | 11.30190800 |
| H | 5.46583700  | 2.44080500  | 11.48221100 |
| H | 4.34798900  | 3.42701600  | 10.54758000 |
| C | 0.57824200  | 0.91370000  | 14.23307800 |
| H | 0.77720600  | 3.01022600  | 14.66550800 |
| C | 2.02672000  | 0.09596700  | 12.47043000 |
| C | 4.77111300  | 6.93129500  | 10.83376800 |
| C | 2.80808700  | 7.51248700  | 9.59670900  |
| H | 1.09251500  | 6.29187500  | 9.91984100  |
| C | -1.99828500 | 3.97500900  | 8.97110300  |
| H | -1.84474500 | 5.24902600  | 10.69469400 |
| C | -0.08418400 | 2.58513100  | 8.51816700  |
| H | 1.55936100  | 2.77063400  | 9.90072100  |
| C | 4.01433500  | 0.58233100  | 10.41841400 |
| C | 1.04489600  | -0.12489200 | 13.43228700 |
| H | -0.17092200 | 0.73776000  | 14.99553000 |
| H | 2.39461300  | -0.75000200 | 11.90753900 |
| C | 4.14378700  | 7.75711500  | 9.90383300  |
| H | 5.81348700  | 7.10147300  | 11.08719300 |
| H | 2.29001600  | 8.13192900  | 8.87235200  |
| C | -1.36639100 | 3.01537700  | 8.18017800  |
| H | -2.99356100 | 4.32163200  | 8.71517000  |
| H | 0.41586600  | 1.84101000  | 7.90747600  |
| C | 4.52736800  | 1.09202300  | 9.06976900  |

|   |             |             |             |
|---|-------------|-------------|-------------|
| H | 3.18504800  | -0.09628100 | 10.22224700 |
| H | 4.80322800  | -0.00584300 | 10.91423800 |
| H | 0.66118400  | -1.13080800 | 13.56646400 |
| H | 4.68626600  | 8.56627700  | 9.42918100  |
| H | -1.86708900 | 2.61109000  | 7.30756600  |
| H | 4.78444500  | 0.23506800  | 8.44230400  |
| H | 3.75989300  | 1.67381500  | 8.55278300  |
| H | 5.42203200  | 1.70967000  | 9.16501300  |
| C | 4.80329100  | 3.00840800  | 13.94027600 |
| H | 5.89382600  | 3.02545000  | 13.85756700 |
| H | 4.52620000  | 3.55665100  | 14.84551700 |
| H | 4.49173100  | 1.97082700  | 14.06624600 |

## TS21

**G +ZPE = -1077.641935 a.u**

|   |             |             |             |
|---|-------------|-------------|-------------|
| C | -2.39935100 | -1.36114600 | 8.46212100  |
| C | 0.34932600  | -2.44805900 | 6.05490100  |
| C | -1.62735500 | -0.78280500 | 9.48661000  |
| C | -3.74379300 | -1.65187100 | 8.68366800  |
| H | -0.04498700 | -3.46722100 | 6.00943500  |
| H | 1.41022400  | -2.51701200 | 6.29896200  |
| C | 0.15433900  | -1.76601200 | 4.71213200  |
| C | -2.23808600 | -0.49843400 | 10.71773200 |
| C | -4.34324000 | -1.35505000 | 9.90729900  |
| H | -4.33009700 | -2.10904000 | 7.89319700  |
| C | -0.67537100 | -2.33572300 | 3.74314900  |
| C | 0.80960700  | -0.56406200 | 4.41948300  |
| H | -1.64437200 | -0.07100500 | 11.51889700 |
| C | -3.58554600 | -0.77517500 | 10.92475900 |
| H | -5.39183600 | -1.57822000 | 10.06486600 |
| H | -1.18099500 | -3.27233600 | 3.95367300  |
| C | -0.85500300 | -1.71564700 | 2.50649300  |
| C | 0.63100000  | 0.05788200  | 3.18669400  |
| H | 1.47117400  | -0.11503800 | 5.15259100  |
| H | -4.04184300 | -0.54738600 | 11.88128400 |
| H | -1.50106700 | -2.17051800 | 1.76438800  |
| C | -0.20389200 | -0.51652400 | 2.22704500  |
| H | 1.14799600  | 0.98606900  | 2.97138700  |
| H | -0.34090200 | -0.03328900 | 1.26647900  |
| C | 0.38168400  | -1.19412100 | 8.16515100  |
| C | -0.20238900 | -0.55705600 | 9.24732900  |
| C | -0.09881300 | 1.76569300  | 8.46030400  |
| H | -1.15040000 | 1.70593600  | 8.69093300  |

|   |             |             |             |
|---|-------------|-------------|-------------|
| H | 0.23161000  | 1.52084000  | 7.46387100  |
| N | 0.65789900  | 2.52220500  | 9.22613200  |
| C | 0.06276200  | 3.05758400  | 10.48461400 |
| H | -0.58591500 | 2.27638600  | 10.87962600 |
| H | 0.87123700  | 3.19581000  | 11.19923200 |
| C | -0.72697700 | 4.34631300  | 10.26557000 |
| H | -0.10071700 | 5.14943100  | 9.87432500  |
| H | -1.55463000 | 4.18586500  | 9.57164700  |
| H | -1.14367400 | 4.67216000  | 11.22099100 |
| C | 2.03445300  | 2.79060800  | 8.92012500  |
| C | 2.75776100  | 1.92315800  | 8.09459300  |
| C | 2.66017300  | 3.92634600  | 9.44628000  |
| C | 4.08696000  | 2.19909100  | 7.79016700  |
| H | 2.30399400  | 1.02336300  | 7.70540100  |
| C | 3.99036600  | 4.19130700  | 9.13501500  |
| H | 2.12225800  | 4.61546700  | 10.08144700 |
| C | 4.70963800  | 3.33351600  | 8.30593900  |
| H | 4.63667300  | 1.51453900  | 7.15553900  |
| H | 4.46067800  | 5.07772700  | 9.54314500  |
| H | 5.74533900  | 3.54385000  | 8.06864800  |
| H | 1.45971100  | -1.28034600 | 8.09092800  |
| N | -0.31120300 | -1.75682600 | 7.17240400  |
| C | -1.77742300 | -1.62979700 | 7.10805900  |
| H | -2.02770600 | -0.82635400 | 6.40255700  |
| H | -2.17752300 | -2.55459600 | 6.68504900  |
| H | 0.44011100  | -0.29882800 | 10.07839800 |

**int-19**

**G +ZPE = -1077.655926 a.u**

|   |             |             |             |
|---|-------------|-------------|-------------|
| C | -2.36345200 | -1.18922500 | 8.29983900  |
| C | 0.98816300  | -1.97378200 | 6.61234600  |
| C | -1.94819600 | -0.38777300 | 9.36232800  |
| C | -3.66247600 | -1.70576700 | 8.27956100  |
| H | 0.88425300  | -3.03462900 | 6.84560700  |
| H | 1.97346700  | -1.64648100 | 6.94066100  |
| C | 0.78670300  | -1.72808700 | 5.13499600  |
| C | -2.83778100 | -0.12108900 | 10.40923600 |
| C | -4.54708000 | -1.42000600 | 9.31270500  |
| H | -3.97774000 | -2.33452600 | 7.45405200  |
| C | 0.20375700  | -2.70970900 | 4.32811000  |
| C | 1.20941900  | -0.52724800 | 4.55396200  |
| H | -2.51281100 | 0.48077900  | 11.25094900 |
| C | -4.13161200 | -0.62823300 | 10.38410500 |

|   |             |             |             |
|---|-------------|-------------|-------------|
| H | -5.55288100 | -1.82198400 | 9.28879600  |
| H | -0.10967000 | -3.65234600 | 4.76379400  |
| C | 0.03181700  | -2.48931300 | 2.96254400  |
| C | 1.03539200  | -0.30625000 | 3.19062200  |
| H | 1.68540100  | 0.23074500  | 5.16526000  |
| H | -4.81163500 | -0.41352600 | 11.19977400 |
| H | -0.41871600 | -3.25810600 | 2.34589200  |
| C | 0.44360000  | -1.28618600 | 2.39323700  |
| H | 1.36876400  | 0.62585400  | 2.74956300  |
| H | 0.31180700  | -1.11472600 | 1.33121900  |
| C | 0.36687100  | -0.50038100 | 8.44041000  |
| C | -0.54356700 | 0.16766900  | 9.39811200  |
| C | -0.52443100 | 1.74763600  | 9.22057400  |
| H | -1.29031400 | 2.11948000  | 9.90286300  |
| H | -0.85863600 | 2.00187100  | 8.21703200  |
| N | 0.73470100  | 2.36848300  | 9.54273500  |
| C | 0.95716700  | 2.65509100  | 10.96487700 |
| H | 0.38821800  | 1.91982500  | 11.53878000 |
| H | 2.00488700  | 2.47441500  | 11.21248000 |
| C | 0.53459500  | 4.06602600  | 11.38687900 |
| H | 1.10162900  | 4.82989500  | 10.85097200 |
| H | -0.52786000 | 4.22974000  | 11.18911300 |
| H | 0.70497600  | 4.20342300  | 12.45805100 |
| C | 1.64255200  | 2.77869600  | 8.56792900  |
| C | 1.41867700  | 2.54994800  | 7.19196000  |
| C | 2.83961200  | 3.44366800  | 8.92052000  |
| C | 2.34075400  | 2.96456100  | 6.23388300  |
| H | 0.51696000  | 2.06240500  | 6.84895700  |
| C | 3.75239700  | 3.84361200  | 7.95142500  |
| H | 3.06214400  | 3.66119800  | 9.95496200  |
| C | 3.51867000  | 3.61165400  | 6.59677700  |
| H | 2.12325400  | 2.77986100  | 5.18745200  |
| H | 4.65740800  | 4.35116500  | 8.26731500  |
| H | 4.23101000  | 3.93181100  | 5.84633300  |
| H | 1.43565000  | -0.35865800 | 8.56006200  |
| N | -0.00880800 | -1.26460500 | 7.47580300  |
| C | -1.43276300 | -1.51683800 | 7.16225600  |
| H | -1.66481000 | -0.92876000 | 6.26965800  |
| H | -1.51676200 | -2.56866900 | 6.88604700  |
| H | -0.10438100 | -0.00956000 | 10.38676700 |

**TS22**

**G +ZPE = -1077.626713 a.u**

|   |             |            |             |
|---|-------------|------------|-------------|
| C | 1.78120000  | 5.32754100 | 11.71446100 |
| C | -0.47601900 | 3.95099300 | 14.03999700 |
| C | 2.01168200  | 4.19906500 | 10.92584300 |
| C | 2.82515000  | 6.21115800 | 11.99184500 |
| H | 0.47527000  | 3.83284500 | 14.57397700 |
| H | -0.97744500 | 2.98019000 | 14.08410900 |
| C | -1.31852800 | 4.98322700 | 14.76950200 |
| C | 3.29474000  | 3.95462400 | 10.42882700 |
| C | 4.09872000  | 5.97256600 | 11.48082400 |
| H | 2.64265400  | 7.08209600 | 12.61232600 |
| C | -1.12658500 | 5.14718300 | 16.14594400 |
| C | -2.30769100 | 5.74245300 | 14.13675100 |
| H | 3.48105800  | 3.06975200 | 9.82918200  |
| C | 4.33448000  | 4.84000300 | 10.70158200 |
| H | 4.90710300  | 6.66038700 | 11.70011200 |
| H | -0.35312900 | 4.57658100 | 16.64973100 |
| C | -1.91497100 | 6.03313100 | 16.87653600 |
| C | -3.09257100 | 6.63629700 | 14.86452600 |
| H | -2.46217600 | 5.65422800 | 13.06816200 |
| H | 5.32680400  | 4.64287900 | 10.31298600 |
| H | -1.75174300 | 6.14473700 | 17.94243000 |
| C | -2.90241200 | 6.78159300 | 16.23714400 |
| H | -3.85126000 | 7.21990600 | 14.35560400 |
| H | -3.51242500 | 7.47686600 | 16.80219500 |
| C | -0.19738800 | 3.21794900 | 11.71023200 |
| C | 0.86183600  | 3.26512900 | 10.59445600 |
| C | 0.28538500  | 3.61180800 | 9.18520600  |
| H | 1.09907500  | 3.64797000 | 8.46567800  |
| H | -0.18284300 | 4.59981700 | 9.19428300  |
| N | -0.65599600 | 2.58278900 | 8.76546600  |
| C | -0.32853700 | 1.76885200 | 7.57989300  |
| H | 0.75308000  | 1.81472700 | 7.45087200  |
| H | -0.57103400 | 0.72627400 | 7.78461100  |
| C | -1.03730900 | 2.25946800 | 6.31720900  |
| H | -2.12260500 | 2.20449000 | 6.42655600  |
| H | -0.76501900 | 3.29302400 | 6.09244000  |
| H | -0.74646500 | 1.63607200 | 5.46846800  |
| C | -1.67983500 | 2.30744200 | 9.59226700  |
| C | -1.87391100 | 3.19047900 | 10.73137900 |
| C | -2.52152800 | 1.17043900 | 9.44652900  |
| C | -2.94566000 | 2.87971600 | 11.64632200 |
| H | -1.77460200 | 4.24652700 | 10.49265000 |
| C | -3.48382500 | 0.90634800 | 10.38843700 |
| H | -2.41535200 | 0.51127800 | 8.59765800  |

|   |             |            |             |
|---|-------------|------------|-------------|
| C | -3.69876000 | 1.75318100 | 11.51025200 |
| H | -3.13267600 | 3.56465800 | 12.46398700 |
| H | -4.10293600 | 0.02465900 | 10.26804500 |
| H | -4.47654200 | 1.51337000 | 12.22385800 |
| H | -0.28020900 | 2.24142100 | 12.17178300 |
| N | -0.20698300 | 4.23395100 | 12.62629000 |
| C | 0.38733200  | 5.52473000 | 12.26155500 |
| H | -0.24979900 | 6.03194500 | 11.52609400 |
| H | 0.40206400  | 6.15969200 | 13.14523600 |
| H | 1.25483400  | 2.25089700 | 10.50164200 |

**int-20**

**G +ZPE = -1077.627937 a.u**

|   |             |            |             |
|---|-------------|------------|-------------|
| C | 2.05805800  | 4.74601600 | 12.28392000 |
| C | -1.38863100 | 4.07866900 | 13.64112800 |
| C | 2.05844100  | 4.03323900 | 11.08540600 |
| C | 3.15419900  | 5.55410900 | 12.60715100 |
| H | -1.08373600 | 3.45484500 | 14.49775400 |
| H | -2.28151600 | 3.61890000 | 13.21758700 |
| C | -1.78537800 | 5.45478000 | 14.14468600 |
| C | 3.15967800  | 4.13124300 | 10.22466600 |
| C | 4.24252200  | 5.65130000 | 11.74798300 |
| H | 3.14959000  | 6.10954300 | 13.53947300 |
| C | -1.78653600 | 5.73928400 | 15.51229100 |
| C | -2.20036000 | 6.44791900 | 13.24934000 |
| H | 3.16731100  | 3.56684300 | 9.29752600  |
| C | 4.24666100  | 4.93399900 | 10.54989800 |
| H | 5.08413100  | 6.28286400 | 12.00841300 |
| H | -1.46357000 | 4.97978200 | 16.21689200 |
| C | -2.19558400 | 6.98863200 | 15.98081500 |
| C | -2.60541700 | 7.69646000 | 13.71349900 |
| H | -2.20057500 | 6.23927800 | 12.18546100 |
| H | 5.09333700  | 4.99924900 | 9.87640300  |
| H | -2.18922500 | 7.19307500 | 17.04560200 |
| C | -2.60520800 | 7.97082600 | 15.08230400 |
| H | -2.92473700 | 8.45584400 | 13.00832200 |
| H | -2.92118500 | 8.94304500 | 15.44323900 |
| C | -0.07986700 | 2.87317200 | 11.88266300 |
| C | 0.88569900  | 3.14993700 | 10.71686800 |
| C | 0.08504300  | 3.74033200 | 9.54626600  |
| H | 0.73576200  | 4.07643800 | 8.74362800  |
| H | -0.50969900 | 4.59227400 | 9.88923300  |
| N | -0.79544800 | 2.69431000 | 8.99964300  |

|   |             |             |             |
|---|-------------|-------------|-------------|
| C | -0.89655300 | 2.59100900  | 7.52444700  |
| H | 0.06594000  | 2.91289100  | 7.12892600  |
| H | -1.01548300 | 1.54536100  | 7.24940700  |
| C | -2.02835100 | 3.45036400  | 6.96251900  |
| H | -2.99923100 | 3.12680200  | 7.34315200  |
| H | -1.88819000 | 4.50319600  | 7.21474600  |
| H | -2.03832400 | 3.35869500  | 5.87454400  |
| C | -1.43819300 | 1.91003900  | 9.83869100  |
| C | -1.41218700 | 2.25406100  | 11.31512300 |
| C | -2.23985200 | 0.80613400  | 9.40176700  |
| C | -1.97510700 | 1.18705200  | 12.20236400 |
| H | -2.14437600 | 3.08210200  | 11.33910800 |
| C | -2.80064800 | -0.04042100 | 10.30628200 |
| H | -2.37235000 | 0.61674400  | 8.34794400  |
| C | -2.64023200 | 0.12212000  | 11.72669000 |
| H | -1.84786000 | 1.32306700  | 13.26869900 |
| H | -3.37618700 | -0.88330000 | 9.94151900  |
| H | -3.05878700 | -0.61878600 | 12.39528000 |
| H | 0.37570500  | 2.12009900  | 12.54382800 |
| N | -0.33137400 | 4.13140000  | 12.61391900 |
| C | 0.90780800  | 4.60849100  | 13.24437800 |
| H | 0.70036400  | 5.57595700  | 13.70377700 |
| H | 1.20529700  | 3.92993500  | 14.06677600 |
| H | 1.27968000  | 2.18593100  | 10.37745900 |

**D<sub>1</sub>'**

**G +ZPE = -1077.240823 a.u**

|   |             |            |             |
|---|-------------|------------|-------------|
| C | 2.21594500  | 4.66784200 | 12.32363000 |
| C | -1.31919900 | 3.90791500 | 13.40918700 |
| C | 2.33585500  | 3.89575600 | 11.16322000 |
| C | 3.27033400  | 5.50545500 | 12.70569100 |
| H | -1.07721500 | 3.38199000 | 14.35010700 |
| H | -2.09974600 | 3.32740700 | 12.91634500 |
| C | -1.87477800 | 5.28054600 | 13.74209200 |
| C | 3.51246200  | 3.97306900 | 10.40712000 |
| C | 4.43411500  | 5.57955300 | 11.94758400 |
| H | 3.17458200  | 6.10405100 | 13.60647300 |
| C | -2.07172800 | 5.67126700 | 15.06912200 |
| C | -2.24022700 | 6.16821900 | 12.72197900 |
| H | 3.60829900  | 3.36636200 | 9.51182500  |
| C | 4.55750000  | 4.80660300 | 10.79156500 |
| H | 5.24112100  | 6.23512400 | 12.25509500 |
| H | -1.78874300 | 4.99662700 | 15.87090500 |

|   |             |             |             |
|---|-------------|-------------|-------------|
| C | -2.62433600 | 6.91599700  | 15.37560600 |
| C | -2.78890600 | 7.41186200  | 13.02339400 |
| H | -2.08701600 | 5.87808900  | 11.68871100 |
| H | 5.46282500  | 4.85300100  | 10.19681000 |
| H | -2.76814800 | 7.20146100  | 16.41191300 |
| C | -2.98421000 | 7.79058100  | 14.35311100 |
| H | -3.06762900 | 8.08672700  | 12.22134100 |
| H | -3.41146200 | 8.75914700  | 14.58750200 |
| C | 0.24011900  | 2.67327200  | 11.89196400 |
| C | 1.19680600  | 2.99912600  | 10.73145100 |
| H | 1.60910400  | 2.05555900  | 10.35715800 |
| C | 0.39243300  | 3.65116200  | 9.59778100  |
| H | 1.05289000  | 3.85219600  | 8.75099000  |
| H | 0.00533900  | 4.61384600  | 9.95513300  |
| N | -0.68100700 | 2.78019500  | 9.12893600  |
| C | -1.21477400 | 3.06784900  | 7.79960100  |
| H | -0.38000700 | 3.43054900  | 7.19506800  |
| H | -1.54213900 | 2.13640300  | 7.33114900  |
| C | -2.34936900 | 4.10051800  | 7.77741600  |
| H | -3.20945900 | 3.75864000  | 8.35793500  |
| H | -2.01671500 | 5.05573100  | 8.19154500  |
| H | -2.68109700 | 4.27435300  | 6.74985800  |
| C | -1.34341500 | 1.95400400  | 10.01874300 |
| C | -0.90678200 | 1.83391800  | 11.36721200 |
| C | -2.44087100 | 1.15807700  | 9.61072100  |
| C | -1.50454000 | 0.88451000  | 12.19805300 |
| C | -3.03343500 | 0.24655100  | 10.47482100 |
| H | -2.82935500 | 1.24359500  | 8.60572700  |
| C | -2.56460300 | 0.08629500  | 11.77784100 |
| H | -1.12704100 | 0.78164200  | 13.21090400 |
| H | -3.86829500 | -0.34753300 | 10.11812900 |
| H | -3.01478200 | -0.63483800 | 12.44930500 |
| H | 0.78055600  | 2.06640000  | 12.63911100 |
| N | -0.16503700 | 3.96559600  | 12.50707100 |
| C | 0.98182900  | 4.56836700  | 13.19008800 |
| H | 0.69737400  | 5.56664300  | 13.53065400 |
| H | 1.23630700  | 3.99059800  | 14.10194000 |

**TS1**

**G +ZPE = -544.903059 a.u**

|   |             |             |             |
|---|-------------|-------------|-------------|
| C | -1.95110600 | 0.25090600  | -1.42135500 |
| O | -1.04353000 | -0.02285800 | -0.64485200 |
| H | -2.08039800 | 1.28149900  | -1.78199600 |

|    |             |             |             |
|----|-------------|-------------|-------------|
| H  | -2.62165600 | -0.51112700 | -1.82858400 |
| C  | -4.76961000 | -0.87194400 | 0.67095800  |
| H  | -5.18321500 | -1.38395100 | -0.21628500 |
| H  | -5.42343600 | -0.00450800 | 0.86372800  |
| H  | -4.91058900 | -1.56226500 | 1.52095000  |
| O  | -3.44007800 | -0.48844800 | 0.48834500  |
| C  | 0.13573700  | -3.55410100 | 1.68444400  |
| H  | -0.25541400 | -4.33959300 | 1.01134300  |
| H  | 0.40379600  | -4.06592100 | 2.62577400  |
| H  | 1.08984100  | -3.21450500 | 1.24025000  |
| O  | -0.76635300 | -2.51840100 | 1.90383500  |
| Mg | -1.76178100 | -1.30074400 | 0.90428400  |

**int-21**

**G +ZPE = -544.916387 a.u**

|    |             |             |             |
|----|-------------|-------------|-------------|
| C  | -2.50116000 | 0.46030800  | -0.67916000 |
| O  | -1.16451700 | 0.35024700  | -0.59105400 |
| H  | -2.91477900 | 1.42076400  | -0.32359000 |
| H  | -2.92711500 | 0.22304700  | -1.67205000 |
| C  | -4.41668900 | -0.92610600 | 0.12494300  |
| H  | -4.63412500 | -1.30713800 | -0.87865900 |
| H  | -5.04661300 | -0.05353400 | 0.32438600  |
| H  | -4.63460800 | -1.69918000 | 0.86079200  |
| O  | -3.03875500 | -0.58567100 | 0.25104800  |
| C  | -0.04731300 | -3.81503600 | 1.80717800  |
| H  | 0.44127300  | -4.05006600 | 2.76966700  |
| H  | 0.52881600  | -4.35552100 | 1.03336200  |
| H  | -1.04162800 | -4.29729700 | 1.84446000  |
| O  | -0.10349500 | -2.44438200 | 1.58147600  |
| Mg | -1.07708500 | -1.22639300 | 0.56804200  |

**int-22**

**G +ZPE = -1948.584984 a.u**

|   |             |             |             |
|---|-------------|-------------|-------------|
| C | -1.23486600 | 0.30672000  | 0.31426400  |
| C | -0.11309100 | 0.46146400  | -0.53398700 |
| C | 0.17241300  | 1.77246300  | -1.03997900 |
| C | -0.67107300 | 2.87359600  | -0.77030100 |
| C | -1.76970400 | 2.73607400  | 0.11019200  |
| C | -2.00918000 | 1.43931900  | 0.67384100  |
| H | -1.38454800 | -0.63495400 | 0.83913400  |
| H | 1.07215300  | 1.92675700  | -1.62213000 |
| H | -0.38867000 | 3.84926000  | -1.13824000 |

|    |             |             |             |
|----|-------------|-------------|-------------|
| H  | -2.78903600 | 1.32983900  | 1.41723600  |
| C  | -2.68512200 | 3.88406900  | 0.48635100  |
| H  | -2.96359100 | 3.73055200  | 1.53432600  |
| C  | -2.05044900 | 5.27323800  | 0.35984300  |
| H  | -2.74231900 | 6.02355100  | 0.74885400  |
| H  | -1.11900700 | 5.34030000  | 0.92496300  |
| H  | -1.84501300 | 5.53119900  | -0.68303800 |
| C  | -3.97155500 | 3.77944200  | -0.36232000 |
| H  | -4.46487800 | 2.81312200  | -0.23483100 |
| H  | -4.67341100 | 4.56103100  | -0.06240600 |
| H  | -3.74728800 | 3.91202500  | -1.42440600 |
| C  | 0.78046700  | -0.69296200 | -0.87348200 |
| H  | 0.68471200  | -1.49886500 | -0.14687100 |
| H  | 0.49420900  | -1.08397300 | -1.85569700 |
| H  | 1.82524900  | -0.38404800 | -0.93057500 |
| Ru | 0.05123300  | 1.93260700  | 1.14409400  |
| O  | 0.69355900  | 0.81233400  | 2.73165800  |
| C  | 1.21922800  | 1.23829800  | 3.94457800  |
| H  | 0.64438800  | 2.05181300  | 4.39727600  |
| H  | 2.28027100  | 1.50857500  | 3.87729800  |
| O  | 1.08987300  | 0.04833700  | 4.75895000  |
| C  | 1.85719400  | 0.03084200  | 5.96903100  |
| H  | 1.54679400  | 0.84903600  | 6.62375500  |
| H  | 1.65501900  | -0.92091000 | 6.45577900  |
| H  | 2.92506400  | 0.11526700  | 5.74876300  |
| C  | -2.29914300 | -2.07495000 | 3.15100000  |
| H  | -3.06705000 | -1.57561700 | 2.53162400  |
| H  | -2.64330300 | -3.11587800 | 3.28177000  |
| H  | -2.35493500 | -1.60334000 | 4.14851800  |
| O  | -1.03297600 | -2.00601500 | 2.56849300  |
| Mg | 0.60176500  | -1.22016300 | 3.11570100  |
| Cl | 2.65247600  | -2.25112600 | 2.53417700  |
| Cl | 1.15059200  | 3.88740000  | 2.07883100  |

**int-23**

**G +ZPE = -1172.969884 a.u**

|   |             |            |             |
|---|-------------|------------|-------------|
| C | -1.25148300 | 1.18104500 | 0.07881700  |
| C | -0.06520700 | 1.36335400 | -0.67997100 |
| C | 0.23067300  | 2.68112600 | -1.15868800 |
| C | -0.62776600 | 3.76925800 | -0.89368300 |
| C | -1.75917900 | 3.61392800 | -0.06038900 |
| C | -2.04599100 | 2.29566800 | 0.43089600  |
| H | -1.47112800 | 0.21126600 | 0.50586800  |

|    |             |             |             |
|----|-------------|-------------|-------------|
| H  | 1.15264000  | 2.85117700  | -1.69931700 |
| H  | -0.32702900 | 4.75587600  | -1.21551300 |
| H  | -2.87818000 | 2.15815200  | 1.11054700  |
| C  | -2.68183000 | 4.75781800  | 0.31436300  |
| H  | -3.04061100 | 4.54787800  | 1.32765500  |
| C  | -2.00746000 | 6.13441000  | 0.32814700  |
| H  | -2.70469400 | 6.87727000  | 0.72232300  |
| H  | -1.11387900 | 6.13465400  | 0.95577000  |
| H  | -1.72412900 | 6.45704400  | -0.67784000 |
| C  | -3.90440100 | 4.74364200  | -0.62796900 |
| H  | -4.42489400 | 3.78337300  | -0.60057100 |
| H  | -4.61156400 | 5.52116600  | -0.32894000 |
| H  | -3.60085200 | 4.93806500  | -1.66059300 |
| C  | 0.85216900  | 0.21535900  | -0.98238900 |
| H  | 0.77686200  | -0.56426800 | -0.22415100 |
| H  | 0.57552000  | -0.22115800 | -1.94791900 |
| H  | 1.88931700  | 0.54643800  | -1.04959400 |
| Ru | 0.00180800  | 2.74495200  | 1.04577900  |
| O  | 0.38430500  | 1.67714900  | 2.65779100  |
| C  | 1.18798300  | 2.00153000  | 3.73438200  |
| H  | 0.81271800  | 2.88533400  | 4.27800300  |
| H  | 2.22921500  | 2.19977900  | 3.42844000  |
| O  | 1.16659000  | 0.87509800  | 4.60679200  |
| C  | 1.97627100  | 1.07858100  | 5.75240000  |
| H  | 1.63511200  | 1.93936400  | 6.34475800  |
| H  | 1.90368200  | 0.17941300  | 6.36449900  |
| H  | 3.02960900  | 1.24018200  | 5.48278800  |
| Cl | 1.37212100  | 4.59746400  | 1.87113400  |

## TS2

**G +ZPE = -1172.96371 a.u**

|   |             |             |             |
|---|-------------|-------------|-------------|
| C | -1.92691400 | 0.18264000  | -0.11702700 |
| C | -0.69010300 | -0.00368100 | -0.75675100 |
| C | 0.17771700  | 1.13461400  | -0.88862500 |
| C | -0.20508300 | 2.40616100  | -0.43185100 |
| C | -1.45577500 | 2.59589900  | 0.23952900  |
| C | -2.28700600 | 1.45926600  | 0.40760000  |
| H | -2.57827100 | -0.66534300 | 0.05107500  |
| H | 1.16043100  | 1.00018000  | -1.32044600 |
| H | 0.48771400  | 3.22973600  | -0.53434900 |
| H | -3.21459600 | 1.56061400  | 0.95706700  |
| C | -1.93157300 | 3.95575400  | 0.71796300  |
| H | -2.59284500 | 3.77369400  | 1.57144400  |

|    |             |             |             |
|----|-------------|-------------|-------------|
| C  | -0.81119000 | 4.89690600  | 1.17844600  |
| H  | -1.24889100 | 5.80208900  | 1.60524300  |
| H  | -0.18105200 | 4.43530900  | 1.94157800  |
| H  | -0.17187500 | 5.20655800  | 0.34725600  |
| C  | -2.77408300 | 4.60627600  | -0.39964300 |
| H  | -3.61155600 | 3.96888500  | -0.69231000 |
| H  | -3.17667700 | 5.56162500  | -0.05430300 |
| H  | -2.16330400 | 4.79610400  | -1.28706700 |
| C  | -0.25936100 | -1.34378600 | -1.27514400 |
| H  | -0.33252300 | -1.35357800 | -2.36738200 |
| H  | 0.77742800  | -1.54906800 | -1.00405100 |
| H  | -0.88915700 | -2.14223800 | -0.88224000 |
| Ru | -0.31419300 | 0.96331500  | 1.29273000  |
| O  | -0.99763400 | 0.41836200  | 3.21792000  |
| C  | -0.34876300 | 1.47259500  | 3.61853500  |
| H  | -0.92873700 | 2.38316600  | 3.84052800  |
| H  | 0.34170300  | 1.95791700  | 2.55628200  |
| O  | 0.63248300  | 1.24638200  | 4.55244400  |
| C  | 1.27588800  | 2.42787300  | 5.04282400  |
| H  | 0.54262300  | 3.15646500  | 5.40301900  |
| H  | 1.91109700  | 2.11347100  | 5.86787600  |
| H  | 1.89384600  | 2.88455200  | 4.26258000  |
| Cl | 1.70248200  | -0.45368000 | 1.73493500  |

**int-24**

**G +ZPE = -1172.990867 a.u**

|   |             |            |             |
|---|-------------|------------|-------------|
| C | -1.74648600 | 0.83942900 | 0.68625400  |
| C | -0.62536200 | 0.53890300 | -0.17498300 |
| C | 0.02652100  | 1.61123200 | -0.76163800 |
| C | -0.41702800 | 2.95740300 | -0.50290800 |
| C | -1.64661700 | 3.24208300 | 0.14332600  |
| C | -2.31392400 | 2.13114600 | 0.75440200  |
| H | -2.22577200 | 0.02947700 | 1.22308200  |
| H | 0.92205300  | 1.45349800 | -1.34959600 |
| H | 0.17086500  | 3.77279700 | -0.90181500 |
| H | -3.22213000 | 2.28922200 | 1.32159200  |
| C | -2.27624400 | 4.62358300 | 0.17944100  |
| H | -2.87129000 | 4.67281000 | 1.09726800  |
| C | -1.27016200 | 5.78015100 | 0.21242200  |
| H | -1.80409300 | 6.72671200 | 0.32732500  |
| H | -0.57241700 | 5.67891200 | 1.04605200  |
| H | -0.69264100 | 5.84412500 | -0.71415900 |
| C | -3.24291400 | 4.76599600 | -1.01415400 |

|    |             |             |             |
|----|-------------|-------------|-------------|
| H  | -3.99306600 | 3.97115700  | -1.01970700 |
| H  | -3.76564200 | 5.72473700  | -0.96358500 |
| H  | -2.69819600 | 4.72561800  | -1.96219400 |
| C  | -0.17781500 | -0.88364500 | -0.35146700 |
| H  | -0.09924500 | -1.39133900 | 0.61309800  |
| H  | -0.90962400 | -1.43610300 | -0.94982300 |
| H  | 0.78799000  | -0.93857300 | -0.85461900 |
| Ru | -0.28404900 | 2.24122800  | 1.58060600  |
| O  | 0.25886400  | 0.82420000  | 3.17427400  |
| C  | 0.72566400  | 1.11017600  | 4.26653600  |
| H  | -0.81201500 | 3.16829700  | 2.75164100  |
| H  | 0.87930000  | 2.14148700  | 4.59756600  |
| O  | 1.07268400  | 0.15972200  | 5.10267300  |
| C  | 1.60434700  | 0.53705500  | 6.39899800  |
| H  | 0.90503000  | 0.18955700  | 7.15671300  |
| H  | 2.56411000  | 0.03767600  | 6.50919000  |
| H  | 1.73069600  | 1.61783200  | 6.46510000  |
| Cl | 1.92378700  | 3.33850900  | 2.05254200  |

**int-25**

**G +ZPE = -947.431605 a.u**

|   |             |             |             |
|---|-------------|-------------|-------------|
| C | -2.56762600 | 0.62033500  | -0.72586800 |
| O | -1.25572900 | 0.62754100  | -0.72354200 |
| H | -3.05304200 | 1.53182400  | -0.30236000 |
| H | -3.05016800 | 0.41613600  | -1.71172200 |
| C | -4.44124900 | -0.93692600 | 0.09611200  |
| O | -3.07535400 | -0.51024800 | 0.18625200  |
| C | -4.65438000 | -1.85319000 | 1.30834000  |
| H | -5.67115600 | -2.25639800 | 1.32497300  |
| H | -3.95264400 | -2.69150900 | 1.27757500  |
| H | -4.48590200 | -1.29898200 | 2.23556900  |
| C | -5.41294600 | 0.25427500  | 0.17626500  |
| H | -5.32360700 | 0.90623900  | -0.69544200 |
| H | -6.44697200 | -0.09955500 | 0.22517400  |
| H | -5.21099600 | 0.84913100  | 1.07113200  |
| C | -4.67832400 | -1.73676000 | -1.19942400 |
| H | -3.98160600 | -2.57802500 | -1.25206900 |
| H | -5.69787900 | -2.13280300 | -1.23275900 |
| H | -4.53109500 | -1.11465100 | -2.08484500 |
| K | -0.59241300 | -1.27580700 | 0.78085600  |

**int-26**

**G +ZPE = -2351.115885 a.u**

|    |             |             |             |
|----|-------------|-------------|-------------|
| C  | -0.71921700 | 0.17210700  | -0.11710500 |
| C  | 0.34887700  | 0.71801800  | -0.89814500 |
| C  | 0.31628100  | 2.10699500  | -1.21030700 |
| C  | -0.68499600 | 2.94430200  | -0.68582400 |
| C  | -1.69741600 | 2.42527900  | 0.17172700  |
| C  | -1.71845100 | 1.01204500  | 0.40514500  |
| H  | -0.70808400 | -0.87799600 | 0.15813600  |
| H  | 1.13777500  | 2.54347300  | -1.76281800 |
| H  | -0.61302800 | 4.01032900  | -0.84846200 |
| H  | -2.46677600 | 0.59813000  | 1.06959500  |
| C  | -2.77292400 | 3.29960600  | 0.78622200  |
| H  | -3.11636000 | 2.78282700  | 1.68796800  |
| C  | -2.28959700 | 4.69573100  | 1.19880000  |
| H  | -3.09069300 | 5.21585900  | 1.72880000  |
| H  | -1.42340900 | 4.63706600  | 1.86156800  |
| H  | -2.02054900 | 5.30808900  | 0.33402300  |
| C  | -3.96480700 | 3.38093900  | -0.19117100 |
| H  | -4.34255100 | 2.38826300  | -0.44742900 |
| H  | -4.77965500 | 3.94699700  | 0.26651100  |
| H  | -3.67712300 | 3.88671100  | -1.11717400 |
| C  | 1.45478300  | -0.16050000 | -1.40484200 |
| H  | 1.64270900  | -0.99267400 | -0.72591500 |
| H  | 1.16435900  | -0.57762100 | -2.37516200 |
| H  | 2.37778900  | 0.40323300  | -1.54317000 |
| Ru | 0.25562000  | 1.81636200  | 1.02072100  |
| O  | 0.41635400  | 0.91748100  | 2.79666300  |
| C  | 1.25239800  | 1.29835300  | 3.84118800  |
| H  | 1.00187000  | 2.30300900  | 4.20424300  |
| H  | 2.30693800  | 1.27984300  | 3.54146100  |
| O  | 1.01934200  | 0.33633900  | 4.87782300  |
| C  | 1.86643200  | 0.37805400  | 6.05992300  |
| Cl | -1.13699800 | -3.29377000 | 1.37650100  |
| Cl | 1.96622000  | 3.46748400  | 1.60960200  |
| K  | -0.80437300 | -1.31453600 | 3.73665700  |
| C  | 1.26671300  | -0.69078300 | 6.97649900  |
| H  | 1.29576600  | -1.67033300 | 6.49244600  |
| H  | 1.82952400  | -0.75360100 | 7.91057000  |
| H  | 0.22754400  | -0.45018900 | 7.21421800  |
| C  | 1.79360500  | 1.75519100  | 6.73452500  |
| H  | 2.31371600  | 1.72692200  | 7.69524800  |
| H  | 2.26201800  | 2.53350300  | 6.12816800  |
| H  | 0.75274300  | 2.03529400  | 6.91603000  |
| C  | 3.31388500  | 0.01301400  | 5.69893200  |

|   |            |             |            |
|---|------------|-------------|------------|
| H | 3.91169000 | -0.08719100 | 6.60843000 |
| H | 3.34126300 | -0.93901900 | 5.16292100 |
| H | 3.78693200 | 0.77549500  | 5.07669000 |

**int-27**

**G +ZPE = -1290.79235 a.u**

|    |             |            |             |
|----|-------------|------------|-------------|
| C  | -0.37297500 | 1.18696600 | 0.11975400  |
| C  | 0.63313100  | 1.75655100 | -0.72723400 |
| C  | 0.41955700  | 3.06931700 | -1.23211900 |
| C  | -0.69064900 | 3.83092700 | -0.82441400 |
| C  | -1.64268900 | 3.30470500 | 0.09702700  |
| C  | -1.49033600 | 1.94312400 | 0.51607900  |
| H  | -0.22396400 | 0.19636000 | 0.53027800  |
| H  | 1.18582600  | 3.53180600 | -1.84005300 |
| H  | -0.75594900 | 4.86489700 | -1.13230400 |
| H  | -2.19053400 | 1.52639700 | 1.22891800  |
| C  | -2.83706000 | 4.10557000 | 0.57906500  |
| H  | -3.14401700 | 3.66419500 | 1.53248000  |
| C  | -2.54017300 | 5.59078700 | 0.82236000  |
| H  | -3.41499400 | 6.06869300 | 1.26916100  |
| H  | -1.69547800 | 5.72086900 | 1.50238400  |
| H  | -2.31886000 | 6.12146900 | -0.10753900 |
| C  | -3.99734200 | 3.92001800 | -0.42126200 |
| H  | -4.24319400 | 2.86443200 | -0.55968900 |
| H  | -4.88990500 | 4.43127100 | -0.05256300 |
| H  | -3.74227000 | 4.34216400 | -1.39745000 |
| C  | 1.85098400  | 0.96694200 | -1.11000700 |
| H  | 2.13648500  | 0.27044400 | -0.32085500 |
| H  | 1.63359100  | 0.38346100 | -2.01114900 |
| H  | 2.69550900  | 1.62132200 | -1.32764900 |
| Ru | 0.34503100  | 3.06725000 | 1.03332200  |
| O  | 0.51086700  | 2.46348400 | 2.90037400  |
| C  | 1.24340300  | 3.05180300 | 3.93945800  |
| H  | 1.02836300  | 4.12193700 | 4.01650600  |
| H  | 2.32056600  | 2.92385800 | 3.77239200  |
| O  | 0.85395800  | 2.49750500 | 5.17977200  |
| C  | 1.58327000  | 1.35241500 | 5.70155700  |
| Cl | 1.90644900  | 4.92432400 | 1.40137600  |
| C  | 0.73479100  | 0.89870800 | 6.89169600  |
| H  | 1.20453700  | 0.05475700 | 7.40284900  |
| H  | 0.61852200  | 1.71687300 | 7.60672300  |
| H  | -0.25843400 | 0.59272800 | 6.55420300  |
| C  | 1.70037500  | 0.22295000 | 4.66983800  |

|   |            |             |            |
|---|------------|-------------|------------|
| H | 0.71218800 | -0.08706300 | 4.32529200 |
| H | 2.28349800 | 0.53120700  | 3.80004300 |
| H | 2.19889400 | -0.63894700 | 5.12243200 |
| C | 2.97148600 | 1.80202400  | 6.18182700 |
| H | 2.87441700 | 2.61828100  | 6.90201600 |
| H | 3.49558800 | 0.97352800  | 6.66593400 |
| H | 3.59339100 | 2.14647400  | 5.35199400 |

### TS3

G +ZPE = -1290.781851 a.u

|    |             |             |             |
|----|-------------|-------------|-------------|
| C  | -2.04462100 | 0.21624100  | -0.11429300 |
| C  | -0.85637000 | -0.06242800 | -0.81058100 |
| C  | 0.06626800  | 1.01853800  | -1.02463100 |
| C  | -0.21773900 | 2.32382900  | -0.59260500 |
| C  | -1.41660500 | 2.60634300  | 0.13720900  |
| C  | -2.30279300 | 1.52670700  | 0.38585600  |
| H  | -2.73323800 | -0.58671200 | 0.11551500  |
| H  | 1.01574500  | 0.81365800  | -1.50090900 |
| H  | 0.51405300  | 3.10154500  | -0.75965700 |
| H  | -3.19358700 | 1.69931100  | 0.97681200  |
| C  | -1.78902900 | 4.00571900  | 0.59356900  |
| H  | -2.36301100 | 3.89208300  | 1.51915900  |
| C  | -0.59160200 | 4.91858700  | 0.88416100  |
| H  | -0.94402200 | 5.85474900  | 1.32272800  |
| H  | 0.10809200  | 4.45968000  | 1.58545700  |
| H  | -0.04418700 | 5.17274600  | -0.02766900 |
| C  | -2.71950700 | 4.64035600  | -0.46181500 |
| H  | -3.61071500 | 4.03123100  | -0.62890600 |
| H  | -3.04047300 | 5.63027100  | -0.12836700 |
| H  | -2.20088600 | 4.75586400  | -1.41800000 |
| C  | -0.53220600 | -1.44050400 | -1.30741200 |
| H  | -1.17992600 | -2.18930100 | -0.85087200 |
| H  | -0.67241200 | -1.48062200 | -2.39242300 |
| H  | 0.50637400  | -1.69619200 | -1.09155200 |
| Ru | -0.31961300 | 0.93833800  | 1.18486700  |
| O  | -0.92967200 | 0.44032400  | 3.13749700  |
| C  | -0.22122300 | 1.47019300  | 3.52184300  |
| H  | -0.76376300 | 2.39803800  | 3.74482300  |
| H  | 0.42884700  | 1.90905400  | 2.42115800  |
| O  | 0.77285200  | 1.18554000  | 4.41821000  |
| C  | 1.34261500  | 2.25796400  | 5.25270800  |
| C  | 0.27610300  | 2.78140500  | 6.22089800  |
| H  | 0.72867300  | 3.48809300  | 6.92067500  |

|    |             |             |            |
|----|-------------|-------------|------------|
| H  | -0.53194500 | 3.30376100  | 5.70391700 |
| H  | -0.15325100 | 1.95660300  | 6.79409400 |
| C  | 1.91857700  | 3.37489000  | 4.37728900 |
| H  | 2.45490700  | 4.09133900  | 5.00400400 |
| H  | 2.62071300  | 2.96755100  | 3.64635100 |
| H  | 1.13861200  | 3.92565000  | 3.84674800 |
| C  | 2.45657100  | 1.54252500  | 6.01566500 |
| H  | 3.20016500  | 1.14500700  | 5.32179900 |
| H  | 2.95208000  | 2.23589200  | 6.69881900 |
| H  | 2.04695800  | 0.71408300  | 6.59765600 |
| Cl | 1.66097200  | -0.55274800 | 1.55095200 |

**int-28**

**G +ZPE = -1290.813539 a.u**

|    |             |             |             |
|----|-------------|-------------|-------------|
| C  | -1.71762700 | 0.87879200  | 0.54969100  |
| C  | -0.53874200 | 0.64376500  | -0.25287500 |
| C  | 0.12490500  | 1.75750600  | -0.74045300 |
| C  | -0.36236100 | 3.08026300  | -0.44211100 |
| C  | -1.63579100 | 3.30777400  | 0.13767600  |
| C  | -2.31638900 | 2.15451100  | 0.64725600  |
| H  | -2.21190200 | 0.03327300  | 1.01313000  |
| H  | 1.05907500  | 1.64743800  | -1.27702900 |
| H  | 0.23136400  | 3.92597400  | -0.76139700 |
| H  | -3.26228600 | 2.26599200  | 1.16141400  |
| C  | -2.29687300 | 4.67333300  | 0.20346100  |
| H  | -2.95468900 | 4.66101900  | 1.07873300  |
| C  | -1.32163800 | 5.84473900  | 0.36837900  |
| H  | -1.88296400 | 6.77372200  | 0.49570100  |
| H  | -0.68136300 | 5.71046600  | 1.24248400  |
| H  | -0.68293200 | 5.96953000  | -0.51060900 |
| C  | -3.18205100 | 4.86272300  | -1.04559000 |
| H  | -3.91175900 | 4.05529400  | -1.14614000 |
| H  | -3.72869200 | 5.80718400  | -0.98088600 |
| H  | -2.57232000 | 4.88457700  | -1.95384300 |
| C  | -0.05150200 | -0.75924100 | -0.47531800 |
| H  | -0.03376600 | -1.32052600 | 0.46217800  |
| H  | -0.72603100 | -1.28785300 | -1.15683300 |
| H  | 0.94961600  | -0.76996300 | -0.90743200 |
| Ru | -0.34602200 | 2.25642300  | 1.60757200  |
| O  | 0.09184000  | 0.77105800  | 3.16528000  |
| C  | 0.47516500  | 1.01383500  | 4.30475600  |
| H  | -0.96050300 | 3.12045400  | 2.78456900  |
| H  | 0.61719000  | 2.03630300  | 4.65871800  |

|    |             |             |            |
|----|-------------|-------------|------------|
| O  | 0.72863600  | 0.03169400  | 5.12999900 |
| C  | 1.18103000  | 0.31305200  | 6.53919800 |
| C  | 1.33842800  | -1.08802600 | 7.11807300 |
| H  | 2.07935100  | -1.65633900 | 6.55261000 |
| H  | 1.66995500  | -1.02082300 | 8.15613300 |
| H  | 0.38805000  | -1.62445200 | 7.09066600 |
| C  | 2.51552300  | 1.05332200  | 6.49135200 |
| H  | 2.41595600  | 2.05797900  | 6.07573600 |
| H  | 2.90555800  | 1.15251600  | 7.50664100 |
| H  | 3.24289800  | 0.49627500  | 5.89735900 |
| C  | 0.08868000  | 1.09855000  | 7.26139500 |
| H  | -0.03497700 | 2.10419200  | 6.85447900 |
| H  | -0.86659600 | 0.57298000  | 7.20159700 |
| H  | 0.35867500  | 1.20030100  | 8.31466800 |
| Cl | 1.81503800  | 3.34465600  | 2.27325200 |

**int-29**

**G +ZPE = -829.614872 a.u**

|   |             |             |             |
|---|-------------|-------------|-------------|
| C | -2.54027100 | 0.38039900  | -0.78292200 |
| O | -1.24473600 | 0.52684600  | -0.68693900 |
| H | -3.16403500 | 1.27247700  | -0.50407500 |
| H | -2.92764300 | 0.01509600  | -1.77241700 |
| C | -4.42674200 | -0.88431800 | 0.12063000  |
| H | -4.75166500 | -1.20384000 | -0.88259500 |
| H | -4.98320000 | 0.03251800  | 0.37343000  |
| H | -4.70738300 | -1.66254200 | 0.83487400  |
| O | -3.03464900 | -0.69024000 | 0.18591400  |
| K | -0.57512200 | -1.13005200 | 1.09879600  |

**int-30**

**G +ZPE = -2233.298213 a.u**

|   |             |             |             |
|---|-------------|-------------|-------------|
| C | -0.83207500 | 0.15951600  | 0.04143000  |
| C | 0.23484900  | 0.60218400  | -0.80248200 |
| C | 0.24827300  | 1.96540000  | -1.21767500 |
| C | -0.71050100 | 2.87823300  | -0.74148900 |
| C | -1.71743400 | 2.46654000  | 0.17733600  |
| C | -1.78189500 | 1.07728200  | 0.52360800  |
| H | -0.85178000 | -0.86618900 | 0.39693800  |
| H | 1.07129800  | 2.32579100  | -1.82060600 |
| H | -0.60319900 | 3.92496300  | -0.98792100 |
| H | -2.52410500 | 0.74710400  | 1.23980500  |
| C | -2.74286800 | 3.42589400  | 0.74882300  |

|    |             |             |             |
|----|-------------|-------------|-------------|
| H  | -3.07392700 | 2.99694600  | 1.69999400  |
| C  | -2.20055400 | 4.83303600  | 1.02919900  |
| H  | -2.96447000 | 5.42142100  | 1.54245700  |
| H  | -1.31191300 | 4.79836700  | 1.66326300  |
| H  | -1.94585200 | 5.36365700  | 0.10790200  |
| C  | -3.96220200 | 3.47060100  | -0.19653900 |
| H  | -4.38186500 | 2.47505400  | -0.35924400 |
| H  | -4.74192800 | 4.10148300  | 0.23685600  |
| H  | -3.68699900 | 3.88911400  | -1.16877900 |
| C  | 1.29328000  | -0.35473400 | -1.26620800 |
| H  | 1.45871400  | -1.14778800 | -0.53661400 |
| H  | 0.96689700  | -0.82163600 | -2.20183300 |
| H  | 2.23631400  | 0.15820400  | -1.45698500 |
| Ru | 0.23362100  | 1.84923300  | 1.02478700  |
| O  | 0.44572600  | 1.04985700  | 2.84276200  |
| C  | 1.33536400  | 1.44729300  | 3.82526000  |
| H  | 1.14410600  | 2.47533700  | 4.17035400  |
| H  | 2.38309700  | 1.37542800  | 3.49498000  |
| O  | 1.13589300  | 0.54772400  | 4.92241800  |
| C  | 2.00632500  | 0.81657800  | 6.01338100  |
| H  | 1.84927900  | 1.82766900  | 6.41006400  |
| H  | 1.78150600  | 0.08964300  | 6.79325100  |
| H  | 3.05856000  | 0.71310100  | 5.71954300  |
| Cl | -1.22663000 | -3.19280300 | 1.76061900  |
| Cl | 1.94847700  | 3.53138800  | 1.49464600  |
| K  | -0.79752600 | -1.08936000 | 3.98733300  |

**[RuCl<sub>2</sub>]**

**G + ZPE = -1403.658702 a.u**

|   |             |             |             |
|---|-------------|-------------|-------------|
| C | -1.99058200 | 0.68511500  | -0.66000900 |
| C | -0.65853400 | 0.55003000  | -1.15049400 |
| C | 0.13195000  | 1.71898400  | -1.18439300 |
| C | -0.40336200 | 2.98248300  | -0.79753800 |
| C | -1.76949500 | 3.14048000  | -0.43094600 |
| C | -2.54334600 | 1.95863700  | -0.34194100 |
| H | -2.58956900 | -0.20234900 | -0.50026700 |
| H | 1.18533400  | 1.64683500  | -1.42198600 |
| H | 0.26531900  | 3.83122800  | -0.75474400 |
| H | -3.54767200 | 2.00668400  | 0.05914100  |
| C | -2.38856100 | 4.48209800  | -0.09606500 |
| H | -3.16203100 | 4.28956300  | 0.65357900  |
| C | -1.40745300 | 5.50462300  | 0.48935200  |
| H | -1.95801000 | 6.39560800  | 0.79919400  |

|    |             |             |             |
|----|-------------|-------------|-------------|
| H  | -0.89071000 | 5.10505200  | 1.36382600  |
| H  | -0.66254700 | 5.82279700  | -0.24532600 |
| C  | -3.07984700 | 5.03084000  | -1.36222700 |
| H  | -3.82115700 | 4.32985000  | -1.75289400 |
| H  | -3.58872600 | 5.96870200  | -1.12736900 |
| H  | -2.34835900 | 5.22889300  | -2.15083700 |
| C  | -0.10221800 | -0.78853300 | -1.52899900 |
| H  | -0.56330800 | -1.58801300 | -0.94847800 |
| H  | -0.31169900 | -0.97465400 | -2.58730500 |
| H  | 0.97741100  | -0.82489300 | -1.38479900 |
| Ru | -0.72827500 | 1.59265700  | 0.86013900  |
| Cl | -1.37712200 | 2.52268700  | 2.99688200  |
| Cl | 0.73017300  | 0.02636600  | 1.98201700  |

**[RuHCl]**

**G +ZPE = -943.956897 a.u**

|    |             |             |             |
|----|-------------|-------------|-------------|
| C  | -2.03791200 | 0.66582800  | -0.46992000 |
| C  | -0.75510800 | 0.52471600  | -1.06399900 |
| C  | 0.02680300  | 1.70927400  | -1.13626400 |
| C  | -0.50654200 | 2.94457400  | -0.65957200 |
| C  | -1.92070700 | 3.11111700  | -0.39067800 |
| C  | -2.66389400 | 1.94950300  | -0.28191900 |
| H  | -2.61980100 | -0.22771900 | -0.27698900 |
| H  | 1.05421900  | 1.66503000  | -1.47261600 |
| H  | 0.14317100  | 3.80978100  | -0.65378700 |
| H  | -3.70146800 | 1.98985400  | 0.02669800  |
| C  | -2.54561300 | 4.47984700  | -0.21180900 |
| H  | -3.52658800 | 4.32022900  | 0.24696200  |
| C  | -1.74120000 | 5.41349200  | 0.70621300  |
| H  | -2.30064000 | 6.33837800  | 0.86731900  |
| H  | -1.54836700 | 4.95040900  | 1.67544200  |
| H  | -0.77971300 | 5.68693400  | 0.26260400  |
| C  | -2.77321100 | 5.12411100  | -1.59523000 |
| H  | -3.39454600 | 4.49043600  | -2.23256200 |
| H  | -3.27436200 | 6.08870100  | -1.47936000 |
| H  | -1.82311300 | 5.29776300  | -2.10920300 |
| C  | -0.24125700 | -0.80638200 | -1.53394200 |
| H  | -0.66037600 | -1.62140400 | -0.94158000 |
| H  | -0.53432300 | -0.96602400 | -2.57675800 |
| H  | 0.84663000  | -0.85716900 | -1.47729000 |
| Ru | -0.55564500 | 1.49203700  | 0.93184000  |
| Cl | -0.11837300 | 2.68957300  | 3.01677900  |
| H  | 0.82058100  | 0.74695300  | 1.20024500  |
